# Supplementary material for: Py-2NO ligand enabled Ni(ii)-catalyzed asymmetric Michael addition reaction of indoles with β,γ-unsaturated α-keto esters
Source: Royal Society of Chemistry journal article supplement (doi:10.1039/d3nj05076a), 2024-01-01

## Py-2NO ligand enabled Ni(II)-catalyzed asymmetric Michael addition reaction of indoles with $\beta,\gamma$ -unsaturated $\alpha$ -keto esters

Zi-Yue Chen<sup>a,b,c</sup>, Xi-Rui Wang<sup>b,c</sup>, Ke-Lan Xu<sup>b,c</sup>, Pan Hu<sup>b</sup>, You-Ping Tian<sup>a,\*</sup>, Hui-Juan Wang<sup>a</sup>, Ying  
Zhou<sup>a</sup>, and Xiong-Li Liu<sup>a,b,\*</sup>

<sup>a</sup> College of Pharmaceutical Sciences, Guizhou University of Traditional Chinese Medicine, Guiyang, 550025.

<sup>b</sup> National & Local Joint Engineering Research Center for the Exploitation of Homology Resources of Southwest Medicine and Food, Guizhou University, Guiyang 550025, Guizhou, China.

<sup>c</sup> These three authors contributed equally to this work.

\*E-mail address: tianyouping034@gzy.edu.cn and xlliu1@gzu.edu.cn

### Table of Contents

|                                                                                                                                           |     |
|-------------------------------------------------------------------------------------------------------------------------------------------|-----|
| Table of contents.....                                                                                                                    | S1  |
| 1. General experimental information.....                                                                                                  | S2  |
| 2. General procedure for preparation of chiral Py-2NO ligands <b>L1</b> .....                                                             | S2  |
| 3. Characterization data of ligands <b>L1</b> , <b>L3g</b> , <b>L4g</b> and <b>5</b> .....                                                | S2  |
| 4. Catalytic asymmetric synthesis of compounds <b>8</b> .....                                                                             | S6  |
| 5. Characterization data of compounds <b>8</b> .....                                                                                      | S6  |
| 6. Control experiments and HPLC spectra for compound <b>8a</b> .....                                                                      | S12 |
| 7. X-ray crystal data for compounds <b>3h</b> , <b>L1g</b> , <b>4</b> and <b>5</b> .....                                                  | S16 |
| 8. References.....                                                                                                                        | S18 |
| 9. The copies of <sup>1</sup> H NMR, <sup>13</sup> C NMR and HPLC spectra for compounds <b>L</b> , <b>4</b> , <b>5</b> and <b>8</b> ..... | S19 |

## 1. General information

Reactions were monitored by thin layer chromatography using UV light to visualize the course of reaction. Purification of reaction products was carried out by flash chromatography.  $^1\text{H}$  and  $^{13}\text{C}$ NMR spectra were obtained using a Bruker DPX-400 spectrometer.  $^1\text{H}$  NMR chemical shifts are reported in ppm ( $\delta$ ) relative to tetramethylsilane (TMS) with the solvent resonance employed as the internal standard. Data are reported as follows: chemical shift, multiplicity (s = singlet, d = doublet, t = triplet, m = multiplet), coupling constants (Hz) and integration.  $^{13}\text{C}$  NMR chemical shifts are reported in ppm ( $\delta$ ) from tetramethylsilane (TMS) with the solvent resonance as the internal standard. Melting points were measured on an electrothermal digital melting point apparatus.

## 2. General procedure for preparation of chiral Py-2NO ligands L1

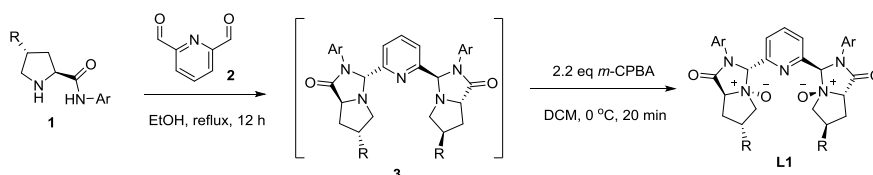

**General procedure A**—In a sealed tube equipped with a magnetic stirring bar, pyridine-2,6-dicarbaldehyde **2** (1.0 mmol) and optically pure 4-hydroxyprolinamide or prolinamide **1** (2.4 mmol, 2.4 equiv) were added. Then, ethanol (6.0 mL) was added and the reaction was heated with stirring at reflux for 12 h. After completion of the reaction, as indicated by TLC, the aftertreatment residue was purified by flash column chromatography to give the intermediate **3**.

For the oxidation step, see: X. Liu, L. Lin and X. Feng, Chiral *N,N'*-dioxide ligands: synthesis, coordination chemistry and asymmetric catalysis, *Org. Chem. Front.*, 2014, **1**, 298-302. In a sealed tube equipped with a magnetic stirring bar, to the intermediate **3** was added 3.0 mL of DCM and *m*-CPBA (2.2 eq). The reaction mixture was stirred at 0 °C for 20 min. After completion of the reaction, as indicated by TLC, the aftertreatment residue was purified by flash column chromatography to furnish the Py-2NO ligand L1.

## 3. Characterization data of ligands L1, L3g, L4g 4 and 5

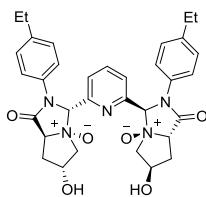

**L1a** (Prepared according to general procedure A): White solid, m.p. 237.5-238.1 °C; overall yield 55%, >20:1 dr; <sup>1</sup>H NMR (CD<sub>3</sub>OD, 400 MHz) δ: 1.05-1.09 (m, 6H), 2.29-2.35 (m, 2H), 2.46-2.52 (m, 4H), 2.61-2.67 (m, 2H), 3.78-3.81 (m, 2H), 4.13-4.16 (m, 2H), 4.19-4.24 (m, 2H), 4.46-4.50 (m, 2H), 6.66 (s, 2H), 7.06 (d, *J* = 8.8 Hz, 4H), 7.28 (d, *J* = 8.8 Hz, 4H), 7.65 (d, *J* = 8.0 Hz, 2H), 7.84-7.88 (m, 1H); <sup>13</sup>C NMR (CD<sub>3</sub>OD, 100 MHz) δ: 14.6, 27.9, 35.1, 70.0, 76.2, 76.4, 87.5, 123.0, 128.4, 129.1, 132.9, 137.4, 143.4, 149.9, 168.0; HRMS (ESI-TOF) *m/z*: Calcd. for C<sub>33</sub>H<sub>37</sub>N<sub>5</sub>NaO<sub>6</sub> [M+Na]<sup>+</sup>: 622.2636; Found: 622.2636.

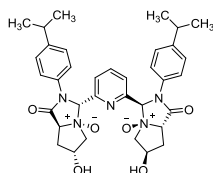

**L1b** (Prepared according to general procedure A): White solid, m.p. 248.3-248.9 °C; overall yield 51%, >20:1 dr; <sup>1</sup>H NMR (CD<sub>3</sub>OD, 400 MHz) δ: 1.07 (s, 6H), 1.09 (s, 6H), 2.29-3.35 (m, 2H), 2.60-2.67 (m, 2H), 2.71-2.78 (m, 2H), 3.81 (d, *J* = 12.0 Hz, 2H), 4.15-4.24 (m, 4H), 4.48 (s, 2H), 6.67 (s, 2H), 7.09 (d, *J* = 8.8 Hz, 4H), 7.29 (d, *J* = 8.8 Hz, 4H), 7.64 (d, *J* = 8.0 Hz, 2H), 7.81-7.85 (m, 1H); <sup>13</sup>C NMR (CD<sub>3</sub>OD, 100 MHz) δ: 22.9, 33.5, 35.2, 70.0, 76.1, 76.4, 87.5, 123.1, 127.0, 129.1, 132.9, 137.4, 148.0, 149.9, 168.0; HRMS (ESI-TOF) *m/z*: Calcd. for C<sub>35</sub>H<sub>41</sub>N<sub>5</sub>NaO<sub>6</sub> [M+Na]<sup>+</sup>: 650.2949; Found: 650.2952.

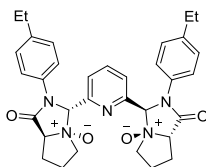

**L1c** (Prepared according to general procedure A): White solid, m.p. 223.5-223.9 °C; overall yield 53%, 19:1 dr; <sup>1</sup>H NMR (CD<sub>3</sub>OD, 400 MHz) δ: 1.15-1.19 (m, 6H), 2.13-2.21 (m, 2H), 2.33-2.46 (m, 6H), 2.55-2.61 (m, 4H), 3.84-3.88 (m, 2H), 3.98-4.01 (m, 2H), 4.07-4.14 (m, 2H), 6.77 (s, 2H), 7.16 (d, *J* = 8.8 Hz, 4H), 7.41 (d, *J* = 8.8 Hz, 4H), 7.77 (d, *J* = 8.0 Hz, 2H), 7.94-7.98 (m, 1H); <sup>13</sup>C NMR (CD<sub>3</sub>OD, 100 MHz) δ: 14.6, 22.1, 24.1, 27.9, 71.0, 76.7, 87.2, 122.8, 128.4, 129.0, 133.1,

137.1, 143.1, 150.2, 168.6; HRMS (ESI-TOF)  $m/z$ : Calcd. for  $C_{33}H_{37}N_5NaO_4$   $[M+Na]^+$ : 590.2738; Found: 590.2734.

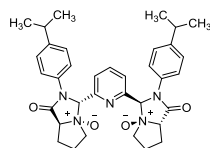

**L1d** (Prepared according to general procedure A): White solid, m.p. 210.3-211.0 °C; overall yield 53%, 19:1 dr;  $^1H$  NMR ( $CD_3OD$ , 400 MHz)  $\delta$ : 1.07 (s, 6H), 1.08 (s, 6H), 2.02-2.07 (m, 2H), 2.22-2.27 (m, 4H), 2.30-2.39 (m, 2H), 2.70-2.77 (m, 2H), 3.73-3.78 (m, 2H), 3.91-4.01 (m, 4H), 6.66 (s, 2H), 7.09 (d,  $J = 8.8$  Hz, 4H), 7.31 (d,  $J = 8.4$  Hz, 4H), 7.65 (d,  $J = 7.6$  Hz, 2H), 7.82-7.86 (m, 1H);  $^{13}C$  NMR ( $CD_3OD$ , 100 MHz)  $\delta$ : 22.2, 22.9, 23.0, 24.2, 33.6, 71.0, 76.8, 87.2, 122.9, 127.0, 129.0, 133.2, 137.2, 147.8, 150.3, 168.6; HRMS (ESI-TOF)  $m/z$ : Calcd. for  $C_{35}H_{41}N_5NaO_4$   $[M+Na]^+$ : 618.3051; Found: 618.3051.

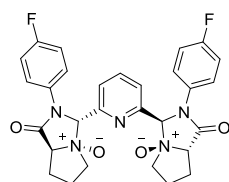

**L1e** (Prepared according to general procedure A): White solid, m.p. 248.5-249.1 °C; overall yield 54%, >20:1 dr;  $^1H$  NMR ( $CD_3OD$ , 400 MHz)  $\delta$ : 2.06-2.12 (m, 2H), 2.23-2.40 (m, 6H), 3.76-3.80 (m, 2H), 4.01-4.09 (m, 4H), 6.66 (s, 2H), 6.94-6.98 (m, 4H), 7.38-7.41 (m, 4H), 7.64 (d,  $J = 7.6$  Hz, 2H), 7.85-7.88 (m, 1H);  $^{13}C$  NMR ( $CD_3OD$ , 100 MHz)  $\delta$ : 22.3, 24.3, 71.3, 76.9, 87.5, 115.8 (d,  $J_{CF} = 23.2$  Hz), 125.7 (d,  $J_{CF} = 9.0$  Hz), 129.0, 131.4 (d,  $J_{CF} = 3.1$  Hz), 137.5, 150.5, 161.6 (d,  $J_{CF} = 245.0$  Hz), 168.9; HRMS (ESI-TOF)  $m/z$ : Calcd. for  $C_{29}H_{27}F_2N_5NaO_4$   $[M+Na]^+$ : 570.1923; Found: 570.1925.

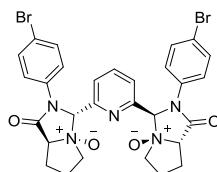

**L1f** (Prepared according to general procedure A): White solid, m.p. 239.5-239.4 °C; overall yield 57%, >20:1 dr;  $^1H$  NMR ( $CD_3OD$ , 400 MHz)  $\delta$ : 2.14-2.20 (m, 2H), 2.33-2.38 (m, 4H), 2.41-2.48

(m, 2H), 3.78-3.87 (m, 4H), 4.05-4.12 (m, 2H), 6.85 (s, 2H), 7.47 (s, 8H), 7.81 (d,  $J = 7.6$  Hz, 2H), 7.99-8.03 (m, 1H);  $^{13}\text{C}$  NMR ( $\text{CD}_3\text{OD}$ , 100 MHz)  $\delta$ : 22.2, 24.1, 70.9, 76.5, 86.4, 119.4, 123.8, 129.4, 132.1, 134.9, 137.3, 149.7, 168.4; HRMS (ESI-TOF)  $m/z$ : Calcd. for  $\text{C}_{29}\text{H}_{27}\text{Br}_2\text{N}_5\text{NaO}_4$   $[\text{M}+\text{Na}]^+$ : 690.0322; Found: 690.0322.

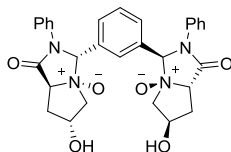

**L3g** (Prepared according to general procedure A): White solid, m.p. 227.1-228.0 °C; overall yield 29%, 15:1 dr;  $^1\text{H}$  NMR ( $\text{CD}_3\text{OD}$ , 400 MHz)  $\delta$ : 2.52-2.58 (m, 2H), 2.77-2.83 (m, 2H), 3.77 (d,  $J = 12.4$  Hz, 2H), 4.25-4.30 (m, 2H), 4.50-4.53 (m, 2H), 4.66 (s, 2H), 6.76 (s, 2H), 7.18-7.21 (m, 2H), 7.27-7.31 (m, 5H), 7.41 (d,  $J = 7.6$  Hz, 4H), 7.49-7.50 (m, 1H), 7.63-7.67 (m, 2H);  $^{13}\text{C}$  NMR ( $\text{CD}_3\text{OD}$ , 100 MHz)  $\delta$ : 35.1, 69.9, 75.8, 76.3, 88.3, 122.9, 123.7, 126.6, 128.6, 128.9, 129.8, 131.9, 135.3, 167.2; HRMS (ESI-TOF)  $m/z$ : Calcd. for  $\text{C}_{30}\text{H}_{30}\text{N}_4\text{NaO}_6$   $[\text{M}+\text{Na}]^+$ : 565.2058; Found: 565.2049.

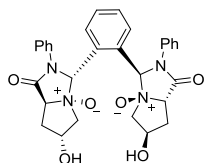

**L4g** (Prepared according to general procedure A): White solid, m.p. 268.2-269.0 °C; overall yield 34%, 17:1 dr;  $^1\text{H}$  NMR ( $\text{CD}_3\text{OD}$ , 400 MHz)  $\delta$ : 2.56-2.63 (m, 2H), 2.88-2.94 (m, 2H), 4.22 (d,  $J = 11.6$  Hz, 2H), 4.34-4.38 (m, 2H), 4.58 (d,  $J = 8.4$  Hz, 2H), 4.65 (s, 2H), 7.16-7.19 (m, 2H), 7.30-7.34 (m, 4H), 7.48-7.52 (m, 2H), 7.57-7.59 (m, 2H), 7.75 (d,  $J = 8.0$  Hz, 4H), 8.07 (s, 2H);  $^{13}\text{C}$  NMR ( $\text{CD}_3\text{OD}$ , 100 MHz)  $\delta$ : 35.2, 70.2, 74.5, 76.6, 85.3, 122.1, 126.1, 127.9, 128.6, 130.6, 133.4, 135.6, 167.3; HRMS (ESI-TOF)  $m/z$ : Calcd. for  $\text{C}_{30}\text{H}_{30}\text{N}_4\text{NaO}_6$   $[\text{M}+\text{Na}]^+$ : 565.2058; Found: 565.2054.

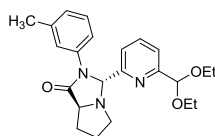

**4**: Light yellow oil; yield 70%, 15:1 dr;  $^1\text{H}$  NMR ( $\text{CDCl}_3$ , 400 MHz)  $\delta$ : 1.11-1.15 (m, 6H), 1.79-1.84 (m, 2H), 2.11-2.21 (m, 5H), 2.86-2.93 (m, 1H), 3.35-3.40 (m, 1H), 3.45-3.61 (m, 4H),

4.11-4.14 (m, 1H), 5.35 (s, 1H), 5.70 (s, 1H), 6.81 (d,  $J = 7.6$  Hz, 1H), 7.02-7.14 (m, 3H), 7.27 (s, 1H), 7.44 (d,  $J = 7.6$  Hz, 1H), 7.59-7.63 (m, 1H);  $^{13}\text{C}$  NMR ( $\text{CDCl}_3$ , 100 MHz)  $\delta$ : 15.2, 15.3, 21.5, 24.8, 27.9, 56.4, 61.9, 62.5, 64.9, 84.8, 102.5, 118.6, 120.0, 120.7, 122.2, 126.1, 128.7, 137.2, 137.9, 138.8, 157.5, 158.6, 175.0; HRMS (ESI-TOF)  $m/z$ : Calcd. for  $\text{C}_{23}\text{H}_{29}\text{N}_3\text{NaO}_3$   $[\text{M}+\text{Na}]^+$ : 418.2101; Found: 418.2091.

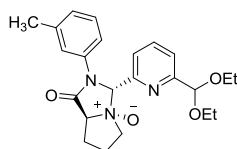

**5** (Prepared according to general procedure A): White solid, m.p. 253.3-254.5 °C; yield 71%, >20:1 dr;  $^1\text{H}$  NMR ( $\text{CD}_3\text{OD}$ , 400 MHz)  $\delta$ : 1.11-1.15 (m, 3H), 1.22-1.25 (m, 3H), 2.21-2.25 (m, 4H), 2.41-2.59 (m, 3H), 3.53-3.58 (m, 2H), 3.62-3.66 (m, 1H), 3.74-3.81 (m, 1H), 3.88-3.92 (m, 1H), 4.11-4.16 (m, 1H), 4.70-4.73 (m, 1H), 5.45 (s, 1H), 6.69 (s, 1H), 7.01-7.03 (m, 1H), 7.15-7.20 (m, 2H), 7.29 (s, 1H), 7.56-7.63 (m, 2H), 7.84-7.87 (m, 1H);  $^{13}\text{C}$  NMR ( $\text{CD}_3\text{OD}$ , 100 MHz)  $\delta$ : 14.2, 14.3, 20.0, 22.3, 24.2, 61.9, 62.6, 70.8, 76.7, 87.9, 102.4, 120.3, 122.0, 123.8, 126.7, 127.5, 128.7, 135.3, 137.3, 139.1, 149.6, 158.7, 169.1; HRMS (ESI-TOF)  $m/z$ : Calcd. for  $\text{C}_{23}\text{H}_{29}\text{N}_3\text{NaO}_4$   $[\text{M}+\text{Na}]^+$ : 434.2050; Found: 434.2057.

#### 4. Catalytic asymmetric synthesis of compounds **8**

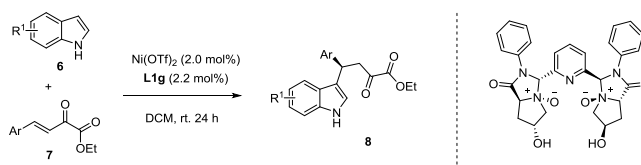

In a sealed tube equipped with a magnetic stirring bar, to the mixture of  $\text{Ni}(\text{OTf})_2$  (2.0 mol %), **L1a** (2.2 mol %) in 2.0 mL of  $\text{CH}_2\text{Cl}_2$  was added **6** (0.30 mmol), and **7** (0.20 mmol). The reaction mixture was stirred at room temperature for 24 h and was directly loaded onto a silica gel and purified by flash chromatography to give the desired product **8**, using hexane/EtOAc (10/1, v/v) as the eluent.

#### 5. Characterization data of compounds **8**

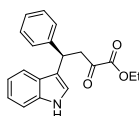

**8a:** Product in accordance with literature characterization data<sup>1a</sup>. 91%, 98% ee,  $[\alpha]_D^{20} = -25.1$  (c 0.720, CHCl<sub>3</sub>); The ee was determined by HPLC analysis using a Chiralpak IA column (95/5 hexane/*i*-PrOH; flow rate: 1.0 mL/min;  $\lambda = 254$  nm;  $\tau_{major} = 38.22$  min;  $\tau_{minor} = 49.46$  min); <sup>1</sup>H NMR (CDCl<sub>3</sub>, 400 MHz)  $\delta$ : 1.18-1.21 (m, 3H), 3.49-3.64 (m, 2H), 4.11-4.16 (m, 2H), 4.82-4.86 (m, 2H), 6.93-6.97 (m, 2H), 7.05-7.12 (m, 2H), 7.17-7.21 (m, 2H), 7.23-7.26 (m, 3H), 7.35 (d,  $J = 8.0$  Hz, 1H), 7.96 (br s, 1H); <sup>13</sup>C NMR (CDCl<sub>3</sub>, 100 MHz)  $\delta$ : 13.9, 37.8, 45.6, 62.5, 111.2, 119.4, 119.5, 122.3, 126.6, 127.8, 128.6, 136.6, 143.3, 161.0, 193.1.

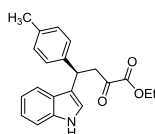

**8b:** Product in accordance with literature characterization data<sup>1b</sup>. 90%, 98% ee,  $[\alpha]_D^{20} = -74.5$  (c 0.6, CHCl<sub>3</sub>); The ee was determined by HPLC analysis using a Chiralpak IA column (90/10 hexane/*i*-PrOH; flow rate: 1.0 mL/min;  $\lambda = 254$  nm;  $\tau_{major} = 15.96$  min;  $\tau_{minor} = 21.32$  min); <sup>1</sup>H NMR (CDCl<sub>3</sub>, 400 MHz)  $\delta$ : 1.15-1.19 (m, 3H), 2.19 (s, 3H), 3.45-3.60 (m, 2H), 4.09-4.14 (m, 2H), 4.77-4.81 (m, 1H), 6.89-6.99 (m, 4H), 7.03-7.07 (m, 1H), 7.12 (d,  $J = 7.6$  Hz, 2H), 7.19 (d,  $J = 8.0$  Hz, 1H), 7.35 (d,  $J = 8.0$  Hz, 1H), 7.95 (br s, 1H); <sup>13</sup>C NMR (CDCl<sub>3</sub>, 100 MHz)  $\delta$ : 13.9, 21.0, 37.5, 45.8, 62.5, 111.2, 119.4, 119.5, 122.2, 127.7, 129.3, 136.1, 136.6, 140.3, 161.1, 193.3.

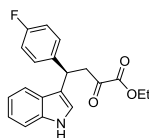

**8c:** 92%, 91% ee; The ee was determined by HPLC analysis using a Chiralpak IA column (90/10 hexane/*i*-PrOH; flow rate: 1.0 mL/min;  $\lambda = 254$  nm;  $\tau_{major} = 16.91$  min;  $\tau_{minor} = 24.98$  min); <sup>1</sup>H NMR (CDCl<sub>3</sub>, 400 MHz)  $\delta$ : 1.18-1.22 (m, 3H), 3.46-3.61 (m, 2H), 4.12-4.17 (m, 2H), 4.80-4.84 (m, 1H), 6.83-6.89 (m, 2H), 6.94-6.96 (m, 2H), 7.06-7.10 (m, 1H), 7.17-7.25 (m, 3H), 7.29 (d,  $J = 8.0$  Hz, 1H), 7.99 (br s, 1H); <sup>13</sup>C NMR (CDCl<sub>3</sub>, 100 MHz)  $\delta$ : 12.9, 36.0, 44.6, 61.5, 110.2, 114.3 (d,  $J_{CF} = 21.3$  Hz), 117.1, 118.4 (d,  $J_{CF} = 29.0$  Hz), 120.4, 121.3, 125.2, 128.2 (d,  $J_{CF} = 8.3$  Hz), 135.6, 137.9, 138.0, 159.9, 160.5 (d,  $J_{CF} = 244.2$  Hz), 191.9; HRMS (ESI-TOF)  $m/z$ : Calcd. for C<sub>20</sub>H<sub>18</sub>FNNaO<sub>3</sub> [M+Na]<sup>+</sup>: 362.1163; Found: 362.1168.

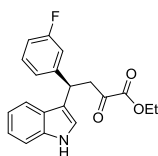

**8d:** Product in accordance with literature characterization data<sup>1b</sup>. 89%, 90% ee,  $[\alpha]_D^{20} = -64.4$  (c 0.45,  $\text{CHCl}_3$ ); The ee was determined by HPLC analysis using a Chiralpak ID column (95/5 hexane/*i*-PrOH; flow rate: 1.0 mL/min;  $\lambda = 254$  nm;  $\tau_{\text{major}} = 17.04$  min;  $\tau_{\text{minor}} = 20.74$  min);  $^1\text{H}$  NMR ( $\text{DMSO-}d_6$ , 400 MHz)  $\delta$ : 1.21-1.24 (m, 3H), 3.59-3.65 (m, 1H), 3.72-3.79 (m, 1H), 4.16-4.22 (m, 2H), 4.74-4.78 (m, 1H), 6.90-6.98 (m, 2H), 7.03-7.06 (m, 1H), 7.18-7.34 (m, 5H), 7.43 (d,  $J = 8.0$  Hz, 1H), 10.95 (br s, 1H);  $^{13}\text{C}$  NMR ( $\text{DMSO-}d_6$ , 100 MHz)  $\delta$ : 14.2, 37.1, 45.2, 62.3, 111.9, 113.3 (d,  $J_{\text{CF}} = 21.2$  Hz), 114.8 (d,  $J_{\text{CF}} = 21.3$  Hz), 117.1, 118.9, 119.0, 119.1, 121.7, 122.7, 124.3, 124.4, 126.5, 130.5 (d,  $J_{\text{CF}} = 9.1$  Hz), 136.8, 148.0, 161.0, 162.6 (d,  $J_{\text{CF}} = 241.5$  Hz), 193.0.

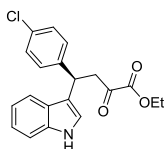

**8e:** Product in accordance with literature characterization data<sup>1b</sup>. 90%, 92% ee,  $[\alpha]_D^{20} = -43.1$  (c 0.55,  $\text{CHCl}_3$ ); The ee was determined by HPLC analysis using a Chiralpak IC column (95/5 hexane/*i*-PrOH; flow rate: 1.0 mL/min;  $\lambda = 254$  nm;  $\tau_{\text{major}} = 26.09$  min;  $\tau_{\text{minor}} = 20.87$  min);  $^1\text{H}$  NMR ( $\text{CDCl}_3$ , 400 MHz)  $\delta$ : 1.18-1.22 (m, 3H), 3.45-3.61 (m, 2H), 4.12-4.18 (m, 2H), 4.79-4.83 (m, 1H), 6.93-6.97 (m, 2H), 7.06-7.10 (m, 1H), 7.13-7.19 (m, 4H), 7.23 (d,  $J = 8.4$  Hz, 1H), 7.29 (d,  $J = 8.0$  Hz, 1H), 7.99 (br s, 1H);  $^{13}\text{C}$  NMR ( $\text{CDCl}_3$ , 100 MHz)  $\delta$ : 13.9, 37.2, 45.4, 62.6, 111.3, 117.9, 119.3, 119.7, 121.6, 122.5, 126.2, 128.7, 129.2, 132.3, 136.6, 141.9, 160.9, 192.9.

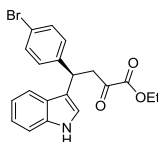

**8f:** Product in accordance with literature characterization data<sup>1b</sup>. 93%, 92% ee,  $[\alpha]_D^{20} = -27.1$  (c 0.55,  $\text{CHCl}_3$ ); The ee was determined by HPLC analysis using a Chiralpak IA column (90/10 hexane/*i*-PrOH; flow rate: 1.0 mL/min;  $\lambda = 254$  nm;  $\tau_{\text{major}} = 18.75$  min;  $\tau_{\text{minor}} = 30.34$  min);  $^1\text{H}$  NMR ( $\text{CDCl}_3$ , 400 MHz)  $\delta$ : 1.18-1.21 (m, 3H), 3.45-3.60 (m, 2H), 4.11-4.17 (m, 2H), 4.77-4.80



(m, 1H), 6.91-6.96 (m, 2H), 7.05-7.12 (m, 3H), 7.21 (d,  $J = 8.0$  Hz, 1H), 7.29 (d,  $J = 8.8$  Hz, 3H), 8.00 (br s, 1H);  $^{13}\text{C}$  NMR ( $\text{CDCl}_3$ , 100 MHz)  $\delta$ : 14.0, 37.2, 45.4, 62.7, 111.4, 117.7, 119.3, 119.7, 120.4, 121.6, 122.5, 126.2, 129.7, 131.7, 136.6, 142.4, 160.9, 192.9.

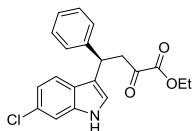

**8g**: Product in accordance with literature characterization data<sup>1b</sup>. 85%, 91% ee,  $[\alpha]_{\text{D}}^{20} = -58.7$  ( $c$  0.89,  $\text{CHCl}_3$ ); The ee was determined by HPLC analysis using a Chiralpak ID column (95/5 hexane/*i*-PrOH; flow rate: 1.0 mL/min;  $\lambda = 254$  nm;  $\tau_{\text{major}} = 16.53$  min;  $\tau_{\text{minor}} = 18.29$  min);  $^1\text{H}$  NMR ( $\text{CDCl}_3$ , 400 MHz)  $\delta$ : 1.18-1.22 (m, 3H), 3.46-3.61 (m, 2H), 4.12-4.17 (m, 2H), 4.77-4.81 (m, 1H), 6.88-6.93 (m, 2H), 7.09-7.12 (m, 1H), 7.16-7.22 (m, 6H), 8.03 (br s, 1H);  $^{13}\text{C}$  NMR ( $\text{CDCl}_3$ , 100 MHz)  $\delta$ : 12.7, 36.4, 44.3, 61.4, 109.9, 119.1, 121.0, 123.8, 125.6, 126.5, 127.4, 135.7, 141.8, 159.7, 191.8.

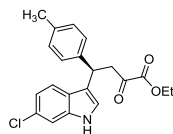

**8h**: 85%, 92% ee; The ee was determined by HPLC analysis using a Chiralpak IC column (93/7 hexane/*i*-PrOH; flow rate: 1.0 mL/min;  $\lambda = 254$  nm;  $\tau_{\text{major}} = 19.72$  min;  $\tau_{\text{minor}} = 18.35$  min);  $^1\text{H}$  NMR ( $\text{DMSO-}d_6$ , 400 MHz)  $\delta$ : 1.20-1.24 (m, 3H), 2.21 (s, 3H), 3.50-3.56 (m, 1H), 3.66-3.72 (m, 1H), 4.16-4.21 (m, 2H), 4.64-4.68 (m, 1H), 6.90-6.92 (m, 1H), 7.04 (d,  $J = 8.0$  Hz, 2H), 7.20 (d,  $J = 8.0$  Hz, 2H), 7.32-7.37 (m, 3H), 11.04 (br s, 1H);  $^{13}\text{C}$  NMR ( $\text{DMSO-}d_6$ , 100 MHz)  $\delta$ : 14.2, 21.0, 36.9, 45.4, 62.3, 111.5, 118.1, 119.1, 120.5, 123.6, 125.5, 126.3, 127.9, 129.3, 135.6, 137.2, 141.6, 161.0, 193.2; HRMS (ESI-TOF)  $m/z$ : Calcd. for  $\text{C}_{21}\text{H}_{20}\text{ClNNaO}_3$   $[\text{M}+\text{Na}]^+$ : 392.1024; Found: 392.1024.

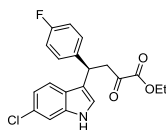

**8i**: Product in accordance with literature characterization data<sup>1d</sup>. 87%, 90% ee; The ee was determined by HPLC analysis using a Chiralpak IE column (95/5 hexane/*i*-PrOH; flow rate: 1.0

mL/min;  $\lambda = 254$  nm;  $\tau_{major} = 16.25$  min;  $\tau_{minor} = 18.56$  min);  $^1\text{H}$  NMR (DMSO- $d_6$ , 400 MHz)  $\delta$ : 1.21-1.25 (m, 3H), 3.54-3.60 (m, 1H), 3.70-3.76 (m, 1H), 4.17-4.22 (m, 2H), 4.71-4.75 (m, 1H), 6.92-6.95 (m, 1H), 7.04-7.09 (m, 2H), 7.36-7.40 (m, 5H), 11.09 (br s, 1H);  $^{13}\text{C}$  NMR (DMSO- $d_6$ , 100 MHz)  $\delta$ : 14.2, 36.5, 45.4, 62.3, 111.5, 115.4 (d,  $J_{CF} = 21.0$  Hz), 117.9, 119.2, 120.4, 123.7, 125.4, 126.5, 129.9 (d,  $J_{CF} = 3.0$  Hz), 137.2, 140.8, 160.8 (d,  $J_{CF} = 240.3$  Hz), 161.0, 193.0.

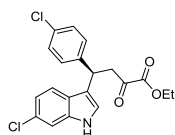

**8j**: 88%, 94% ee; The ee was determined by HPLC analysis using a Chiralpak IE column (95/5 hexane/*i*-PrOH; flow rate: 1.0 mL/min;  $\lambda = 254$  nm;  $\tau_{major} = 17.06$  min;  $\tau_{minor} = 21.81$  min);  $^1\text{H}$  NMR (DMSO- $d_6$ , 400 MHz)  $\delta$ : 1.21-1.25 (m, 3H), 3.55-3.61 (m, 1H), 3.69-3.76 (m, 1H), 4.17-4.22 (m, 2H), 4.69-4.73 (m, 1H), 6.92-6.94 (m, 1H), 7.29-7.39 (m, 7H), 11.09 (br s, 1H);  $^{13}\text{C}$  NMR (DMSO- $d_6$ , 100 MHz)  $\delta$ : 14.2, 36.6, 45.1, 62.3, 111.5, 117.6, 119.2, 120.4, 123.8, 125.3, 126.5, 128.6, 128.8, 130.0, 131.2, 137.2, 143.7, 160.9, 192.9; HRMS (ESI-TOF)  $m/z$ : Calcd. for  $\text{C}_{20}\text{H}_{17}\text{Cl}_2\text{NNaO}_3$   $[\text{M}+\text{Na}]^+$ : 412.0478; Found: 412.0484.

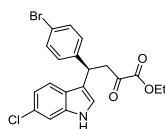

**8k**: 89%, 99% ee; The ee was determined by HPLC analysis using a Chiralpak IE column (95/5 hexane/*i*-PrOH; flow rate: 1.0 mL/min;  $\lambda = 254$  nm;  $\tau_{major} = 20.82$  min;  $\tau_{minor} = 26.38$  min);  $^1\text{H}$  NMR (DMSO- $d_6$ , 400 MHz)  $\delta$ : 1.21-1.25 (m, 3H), 3.55-3.61 (m, 1H), 3.69-3.75 (m, 1H), 4.17-4.22 (m, 2H), 4.67-4.71 (m, 1H), 6.92-6.94 (m, 1H), 7.30 (d,  $J = 8.4$  Hz, 2H), 7.36-7.44 (m, 5H), 11.09 (br s, 1H);  $^{13}\text{C}$  NMR (DMSO- $d_6$ , 100 MHz)  $\delta$ : 14.2, 36.6, 45.0, 62.3, 111.5, 117.5, 119.2, 119.6, 120.4, 123.8, 125.3, 126.5, 130.4, 130.5, 131.6, 131.7, 144.1, 160.9, 192.8; HRMS (ESI-TOF)  $m/z$ : Calcd. for  $\text{C}_{20}\text{H}_{17}\text{BrClNNaO}_3$   $[\text{M}+\text{Na}]^+$ : 455.9973; Found: 455.9980.

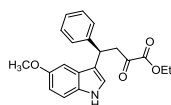

**8l**: Product in accordance with literature characterization data<sup>1b</sup>. 92%, 96% ee,  $[\alpha]_D^{20} = -51.0$  (c

0.55, CHCl<sub>3</sub>); The ee was determined by HPLC analysis using a Chiralpak IE column (95/5 hexane/*i*-PrOH; flow rate: 1.0 mL/min;  $\lambda = 254$  nm;  $\tau_{major} = 34.27$  min;  $\tau_{minor} = 41.07$  min); <sup>1</sup>H NMR (DMSO-*d*<sub>6</sub>, 400 MHz)  $\delta$ : 1.20-1.23 (m, 3H), 3.53-3.59 (m, 1H), 3.67-3.75 (m, 4H), 4.15-4.21 (m, 2H), 4.66-4.70 (m, 1H), 6.68-6.71 (m, 1H), 6.85 (d,  $J = 2.4$  Hz, 1H), 7.11-7.15 (m, 1H), 7.20-7.27 (m, 4H), 7.36 (d,  $J = 7.2$  Hz, 2H), 10.74 (br s, 1H); <sup>13</sup>C NMR (DMSO-*d*<sub>6</sub>, 100 MHz)  $\delta$ : 14.2, 37.5, 45.4, 55.8, 62.3, 101.2, 111.4, 112.5, 117.4, 123.2, 126.5, 127.0, 128.1, 128.7, 132.0, 144.8, 153.4, 161.1, 193.3.

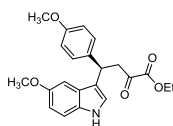

**8m**: 90%, 97% ee; The ee was determined by HPLC analysis using a Chiralpak IB column (90/10 hexane/*i*-PrOH; flow rate: 1.0 mL/min;  $\lambda = 254$  nm;  $\tau_{major} = 31.68$  min;  $\tau_{minor} = 27.02$  min); <sup>1</sup>H NMR (DMSO-*d*<sub>6</sub>, 400 MHz)  $\delta$ : 1.20-1.23 (m, 3H), 3.48-3.54 (m, 1H), 3.64-3.70 (m, 7H), 4.15-4.21 (m, 2H), 4.62-4.65 (m, 1H), 6.68-6.71 (m, 1H), 6.80-6.84 (m, 3H), 7.19-7.27 (m, 4H), 10.71 (br s, 1H); <sup>13</sup>C NMR (DMSO-*d*<sub>6</sub>, 100 MHz)  $\delta$ : 14.2, 36.8, 45.8, 55.4, 55.8, 62.3, 101.3, 111.3, 112.5, 114.0, 117.7, 123.1, 127.0, 129.1, 132.1, 136.7, 153.3, 158.0, 161.1, 193.5; HRMS (ESI-TOF) *m/z*: Calcd. for C<sub>22</sub>H<sub>23</sub>NNaO<sub>5</sub> [M+Na]<sup>+</sup>: 404.1468; Found: 404.1471.

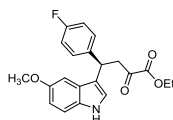

**8n**: 92%, 94% ee; The ee was determined by HPLC analysis using a Chiralpak IC column (90/10 hexane/*i*-PrOH; flow rate: 1.0 mL/min;  $\lambda = 254$  nm;  $\tau_{major} = 41.90$  min;  $\tau_{minor} = 35.41$  min); <sup>1</sup>H NMR (DMSO-*d*<sub>6</sub>, 400 MHz)  $\delta$ : 1.21-1.24 (m, 3H), 3.53-3.59 (m, 1H), 3.66-3.75 (m, 4H), 4.16-4.22 (m, 2H), 4.68-4.72 (m, 1H), 6.69-6.72 (m, 1H), 6.85 (d,  $J = 2.4$  Hz, 1H), 7.05-7.09 (m, 2H), 7.21-7.23 (m, 2H), 7.38-7.42 (m, 2H), 10.76 (br s, 1H); <sup>13</sup>C NMR (DMSO-*d*<sub>6</sub>, 100 MHz)  $\delta$ : 14.2, 36.7, 45.4, 55.8, 62.3, 101.2, 111.5, 112.5, 115.3 (d,  $J_{CF} = 21.1$  Hz), 117.3, 123.2, 126.9, 129.9 (d,  $J_{CF} = 3.2$  Hz), 141.0, 153.4, 161.0, 161.5 (d,  $J_{CF} = 240.4$  Hz), 193.2; HRMS (ESI-TOF) *m/z*: Calcd. for C<sub>21</sub>H<sub>20</sub>FNNaO<sub>4</sub> [M+Na]<sup>+</sup>: 392.1269; Found: 392.1275.

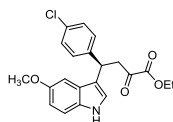

**8o**: 93%, 90% ee; The ee was determined by HPLC analysis using a Chiralpak ID column (90/10 hexane/*i*-PrOH; flow rate: 1.0 mL/min;  $\lambda = 254$  nm;  $\tau_{major} = 15.06$  min;  $\tau_{minor} = 22.54$  min);  $^1\text{H}$  NMR (DMSO- $d_6$ , 400 MHz)  $\delta$ : 1.21-1.24 (m, 3H), 3.55-3.61 (m, 1H), 3.66-3.76 (m, 4H), 4.17-4.22 (m, 2H), 4.68-4.72 (m, 1H), 6.70-6.73 (m, 1H), 6.87 (d,  $J = 2.4$  Hz, 1H), 7.22 (d,  $J = 8.8$  Hz, 2H), 7.28-7.31 (m, 2H), 7.40 (d,  $J = 8.4$  Hz, 2H), 10.78 (br s, 1H);  $^{13}\text{C}$  NMR (DMSO- $d_6$ , 100 MHz)  $\delta$ : 14.2, 36.8, 45.2, 55.8, 62.3, 101.2, 111.5, 112.6, 117.0, 123.3, 126.9, 128.6, 128.8, 130.0, 131.1, 132.0, 143.9, 153.4, 161.0, 193.1; HRMS (ESI-TOF)  $m/z$ : Calcd. for  $\text{C}_{21}\text{H}_{20}\text{ClNNaO}_4$   $[\text{M}+\text{Na}]^+$ : 408.0973; Found: 408.0974.

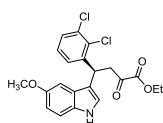

**8p**: 93%, 91% ee; The ee was determined by HPLC analysis using a Chiralpak IA column (85/15 hexane/*i*-PrOH; flow rate: 1.0 mL/min;  $\lambda = 254$  nm;  $\tau_{major} = 10.68$  min;  $\tau_{minor} = 17.62$  min);  $^1\text{H}$  NMR (DMSO- $d_6$ , 400 MHz)  $\delta$ : 1.22-1.26 (m, 3H), 3.54-3.61 (m, 1H), 3.69 (s, 3H), 3.76-3.82 (m, 1H), 4.18-4.23 (m, 2H), 5.17-5.20 (m, 1H), 6.71-6.74 (m, 1H), 6.87 (d,  $J = 2.4$  Hz, 1H), 7.18 (d,  $J = 2.4$  Hz, 1H), 7.23-7.28 (m, 2H), 7.39-7.47 (m, 2H), 10.84 (br s, 1H);  $^{13}\text{C}$  NMR (DMSO- $d_6$ , 100 MHz)  $\delta$ : 14.2, 34.7, 44.6, 55.7, 62.3, 100.8, 111.6, 112.7, 115.8, 124.0, 128.2, 128.5, 128.8, 131.9, 132.2, 144.5, 153.5, 160.7, 192.6; HRMS (ESI-TOF)  $m/z$ : Calcd. for  $\text{C}_{21}\text{H}_{19}\text{Cl}_2\text{NNaO}_4$   $[\text{M}+\text{Na}]^+$ : 442.0583; Found: 442.0577.

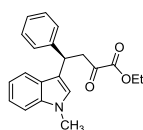

**8q**: Product in accordance with literature characterization data<sup>1b</sup>. 70% yield, 55% ee,  $[\alpha]_{\text{D}}^{20} = -16.7$  ( $c$  4.2,  $\text{CHCl}_3$ ); The ee was determined by HPLC analysis using a Chiralpak IA column (85/15 hexane/*i*-PrOH; flow rate: 1.0 mL/min;  $\lambda = 254$  nm;  $\tau_{major} = 15.54$  min;  $\tau_{minor} = 14.59$  min);  $^1\text{H}$  NMR (DMSO- $d_6$ , 400 MHz)  $\delta$ : 1.20-1.24 (m, 3H), 3.55-3.61 (m, 1H), 3.67-3.74 (m, 4H), 4.16-4.21 (m, 2H), 4.70-4.73 (m, 1H), 6.91-6.95 (m, 1H), 7.08-7.15 (m, 2H), 7.22-7.26 (m, 3H), 7.33-7.36 (m, 3H), 7.41 (d,  $J = 8.0$  Hz, 1H);  $^{13}\text{C}$  NMR (DMSO- $d_6$ , 100 MHz)  $\delta$ : 14.2, 32.8, 37.3, 45.4, 62.3, 110.1, 117.0, 118.9, 119.3, 121.7, 126.6, 126.9, 127.0, 128.1, 128.7, 137.2, 144.8, 160.9, 193.0.

## 6. Control experiments and HPLC spectra for compound **8a**

In a sealed tube equipped with a magnetic stirring bar, to the mixture of Ni(OTf)<sub>2</sub> (2.0 mol %), **L** (2.2 mol %) in 2.0 mL of CH<sub>2</sub>Cl<sub>2</sub> was added **6a** (0.30 mmol), and **7a** (0.20 mmol). The reaction mixture was stirred at room temperature for 24 h and was directly loaded onto a silica gel and purified by flash chromatography to give the desired product **8a**, using hexane/EtOAc (10/1, v/v) as the eluent.

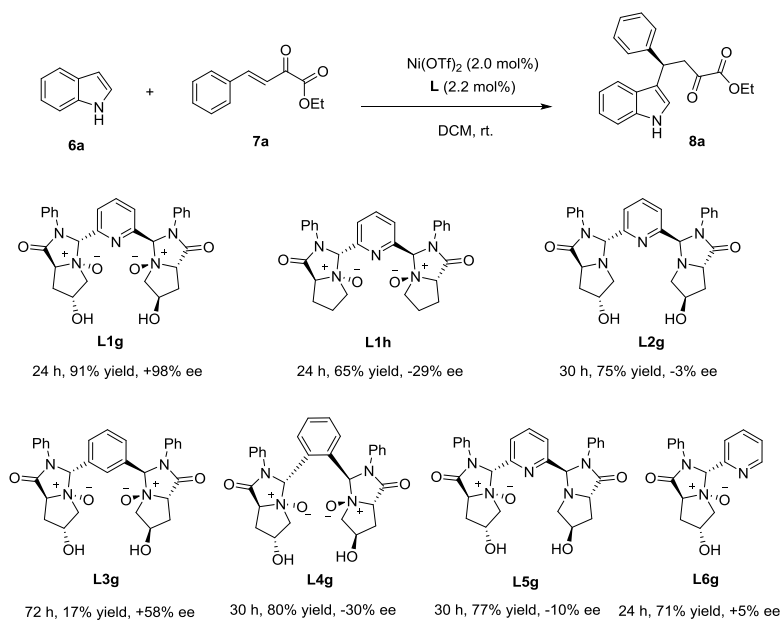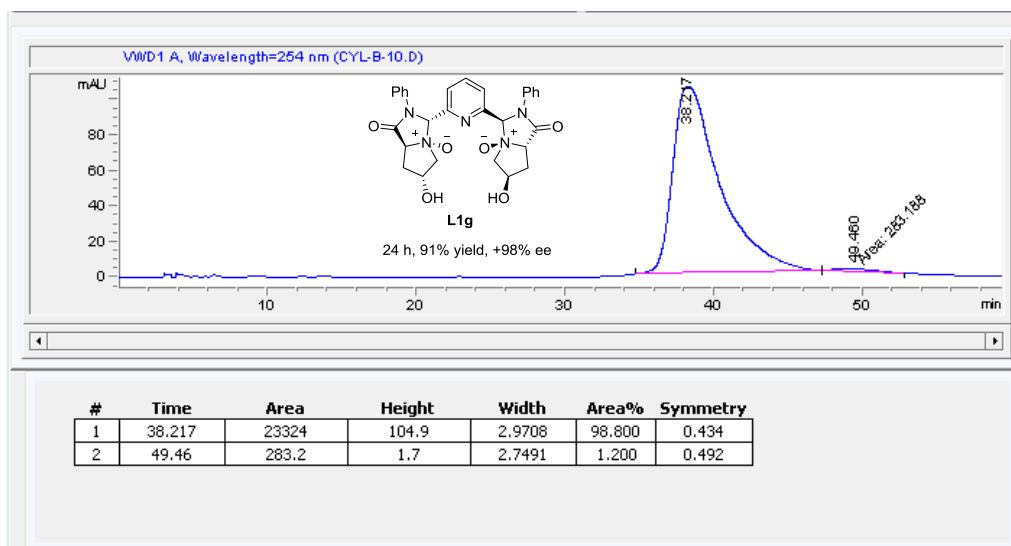

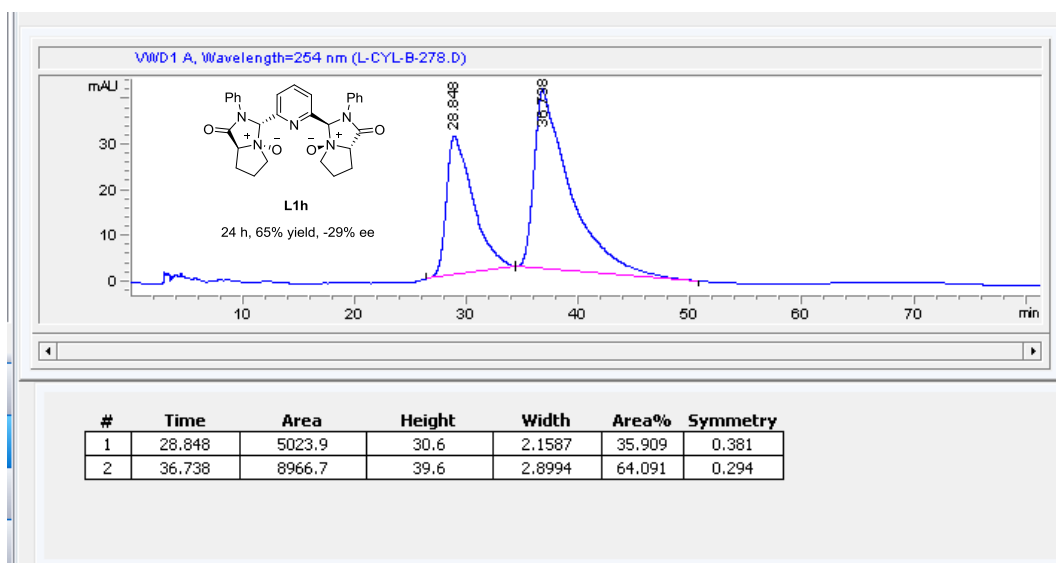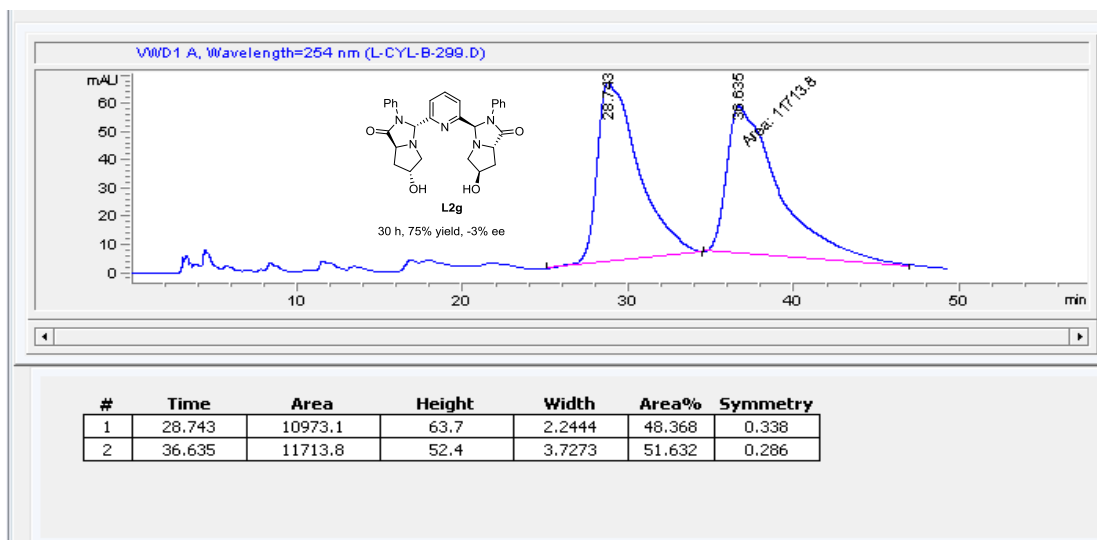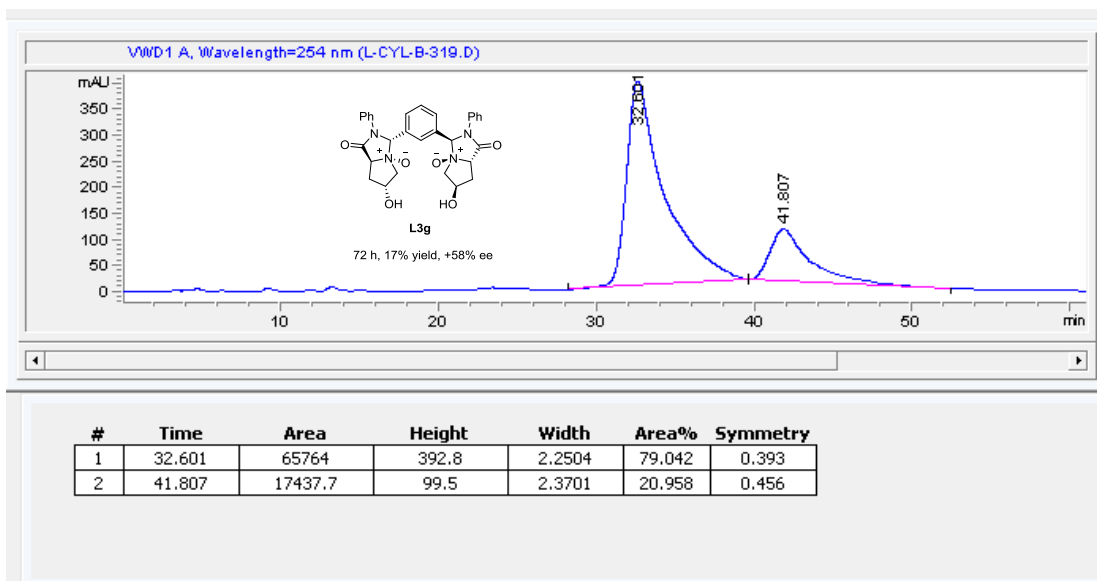

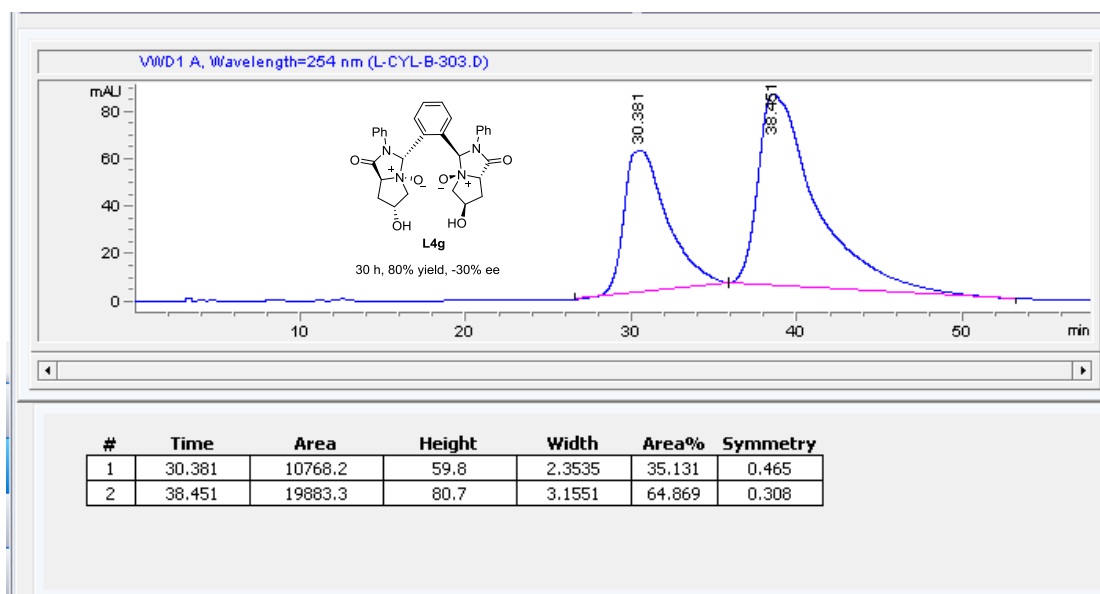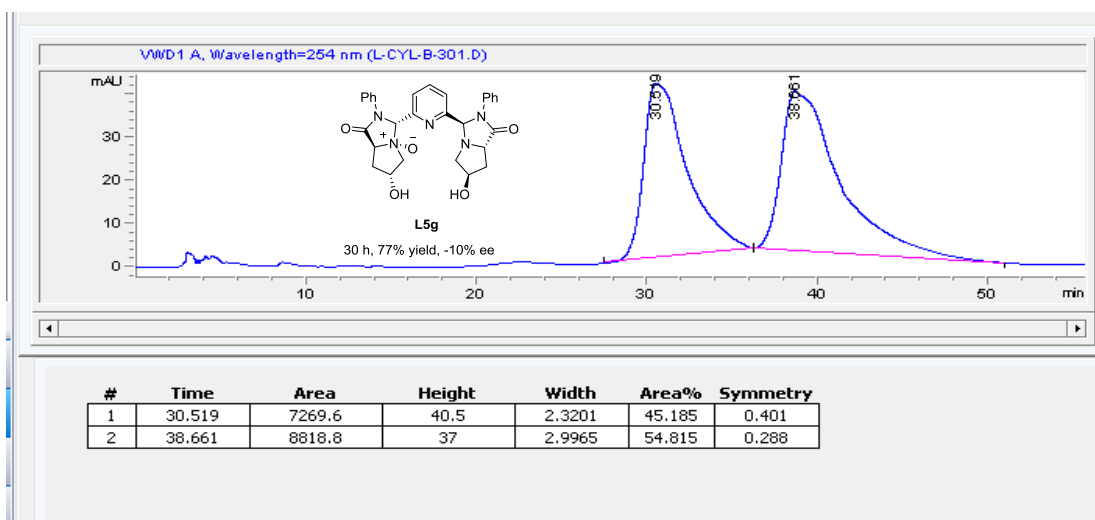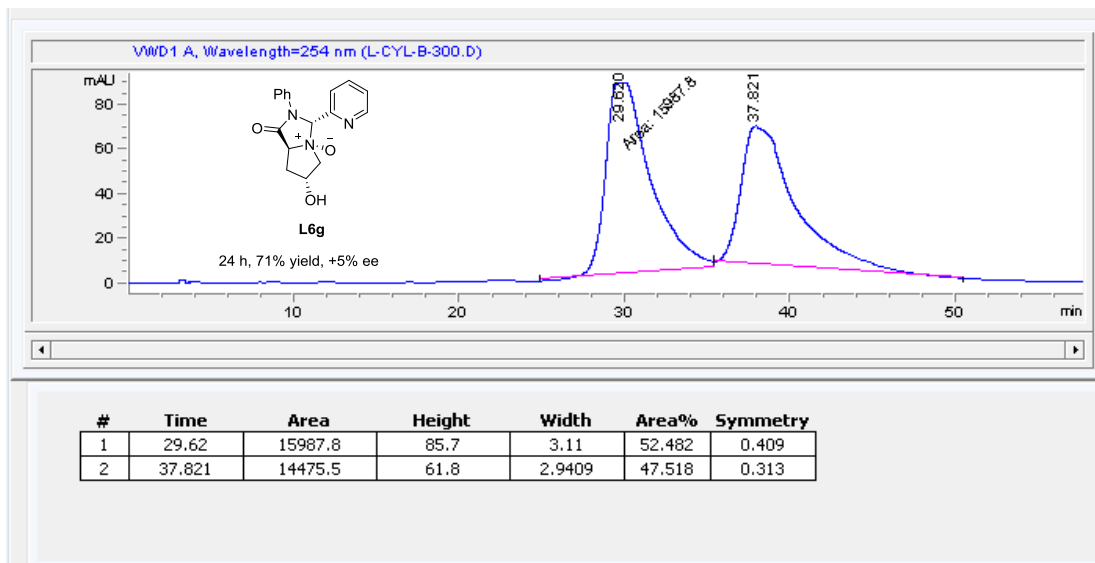

## 7. X-ray crystal data for compounds 3h, L1g, and 5

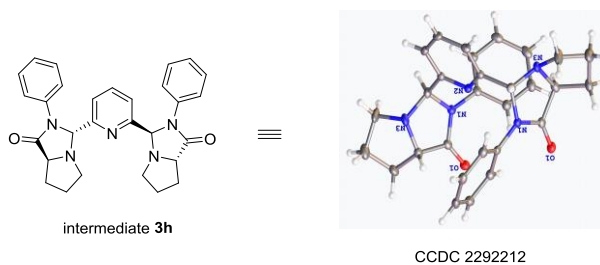

**Table S1 Crystal data and structure refinement for 3h**

|                                             |                                                               |
|---------------------------------------------|---------------------------------------------------------------|
| Identification code                         | <b>3h</b>                                                     |
| Empirical formula                           | C <sub>29</sub> H <sub>31</sub> N <sub>5</sub> O <sub>3</sub> |
| Formula weight                              | 497.59                                                        |
| Temperature/K                               | 162(18)                                                       |
| Crystal system                              | trigonal                                                      |
| Space group                                 | P3 <sub>2</sub> 21                                            |
| a/Å, b/Å, c/Å                               | 9.35380(10), 9.35380(10), 24.4673(3)                          |
| α/°, β/°, γ/°                               | 90, 90, 120                                                   |
| Volume/Å <sup>3</sup>                       | 1853.93(5)                                                    |
| Z                                           | 3                                                             |
| ρ <sub>calc</sub> /cm <sup>3</sup>          | 1.337                                                         |
| μ/mm <sup>-1</sup>                          | 0.713                                                         |
| F(000)                                      | 792.0                                                         |
| Radiation                                   | Cu Kα (λ = 1.54184)                                           |
| Crystal size/mm <sup>3</sup>                | 0.15 × 0.12 × 0.1                                             |
| 2θ range for data collection/°              | 10.848 to 142.81                                              |
| Index ranges                                | -11 ≤ h ≤ 7, -8 ≤ k ≤ 11, -29 ≤ l ≤ 29                        |
| Reflections collected                       | 8924                                                          |
| Independent reflections                     | 2390 [R <sub>int</sub> = 0.0195, R <sub>sigma</sub> = 0.0136] |
| Data/restraints/parameters                  | 2390/0/172                                                    |
| Goodness-of-fit on F <sup>2</sup>           | 1.085                                                         |
| Final R indexes [I ≥ 2σ(I)]                 | R <sub>1</sub> = 0.0378, wR <sub>2</sub> = 0.1036             |
| Final R indexes [all data]                  | R <sub>1</sub> = 0.0380, wR <sub>2</sub> = 0.1037             |
| Largest diff. peak/hole / e Å <sup>-3</sup> | 0.45/-0.34                                                    |
| Flack parameter                             | 0.02(7)                                                       |

**Crystal Data** for C<sub>29</sub>H<sub>31</sub>N<sub>5</sub>O<sub>3</sub> (*M* = 497.59 g/mol): trigonal, space group P3<sub>2</sub>21 (no. 154), *a* = 9.35380(10) Å, *c* = 24.4673(3) Å, *V* = 1853.93(5) Å<sup>3</sup>, *Z* = 3, *T* = 162(18) K, μ(Cu Kα) = 0.713 mm<sup>-1</sup>, *D*<sub>calc</sub> = 1.337 g/cm<sup>3</sup>, 8924 reflections measured (10.848° ≤ 2θ ≤ 142.81°), 2390 unique (*R*<sub>int</sub> = 0.0195, *R*<sub>sigma</sub> = 0.0136) which were used in all calculations. The final *R*<sub>1</sub> was 0.0378 (*I* > 2σ(*I*)) and *wR*<sub>2</sub> was 0.1037 (all data).



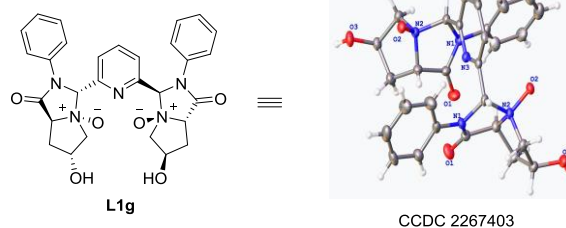

**Table S2 Crystal data and structure refinement for L1g**

|                                                      |                                                                  |
|------------------------------------------------------|------------------------------------------------------------------|
| Identification code                                  | <b>L1g</b>                                                       |
| Empirical formula                                    | $C_{29}H_{41}N_5O_{12}$                                          |
| Formula weight                                       | 651.67                                                           |
| Temperature/K                                        | 150.00(10)                                                       |
| Crystal system                                       | monoclinic                                                       |
| Space group                                          | I2                                                               |
| $a/\text{\AA}$ , $b/\text{\AA}$ , $c/\text{\AA}$     | 10.5408(7), 8.9758(5), 16.0958(7)                                |
| $\alpha/^\circ$ , $\beta/^\circ$ , $\gamma/^\circ$ , | 90, 98.351(5), 90                                                |
| Volume/ $\text{\AA}^3$                               | 1506.70(14)                                                      |
| Z                                                    | 2                                                                |
| $\rho_{\text{calc}}/\text{cm}^3$                     | 1.436                                                            |
| $\mu/\text{mm}^{-1}$                                 | 0.949                                                            |
| F(000)                                               | 692.0                                                            |
| Radiation                                            | Cu K $\alpha$ ( $\lambda = 1.54184$ )                            |
| Crystal size/ $\text{mm}^3$                          | 0.14 $\times$ 0.13 $\times$ 0.1                                  |
| 2 $\Theta$ range for data collection/ $^\circ$       | 9.438 to 149.61                                                  |
| Index ranges                                         | -13 $\leq h \leq$ 12, -10 $\leq k \leq$ 10, -19 $\leq l \leq$ 19 |
| Reflections collected                                | 4899                                                             |
| Independent reflections                              | 2755 [ $R_{\text{int}} = 0.0253$ , $R_{\text{sigma}} = 0.0306$ ] |
| Data/restraints/parameters                           | 2755/1/224                                                       |
| Goodness-of-fit on $F^2$                             | 1.050                                                            |
| Final R indexes [ $I > 2\sigma(I)$ ]                 | $R_1 = 0.0647$ , $wR_2 = 0.1763$                                 |
| Final R indexes [all data]                           | $R_1 = 0.0710$ , $wR_2 = 0.1830$                                 |
| Largest diff. peak/hole / $e \text{\AA}^{-3}$        | 0.44/-0.77                                                       |
| Flack parameter                                      | -0.06(18)/-0.03(9)                                               |

**Crystal Data** for  $C_{29}H_{41}N_5O_{12}$  ( $M = 651.67$  g/mol): monoclinic, space group I2 (no. 5),  $a = 10.5408(7)$   $\text{\AA}$ ,  $b = 8.9758(5)$   $\text{\AA}$ ,  $c = 16.0958(7)$   $\text{\AA}$ ,  $\beta = 98.351(5)^\circ$ ,  $V = 1506.70(14)$   $\text{\AA}^3$ ,  $Z = 2$ ,  $T = 150.00(10)$  K,  $\mu(\text{Cu K}\alpha) = 0.949$   $\text{mm}^{-1}$ ,  $D_{\text{calc}} = 1.436$   $\text{g/cm}^3$ , 4899 reflections measured ( $9.438^\circ \leq 2\Theta \leq 149.61^\circ$ ), 2755 unique ( $R_{\text{int}} = 0.0253$ ,  $R_{\text{sigma}} = 0.0306$ ) which were used in all calculations. The final  $R_1$  was 0.0647 ( $I > 2\sigma(I)$ ) and  $wR_2$  was 0.1830 (all data).

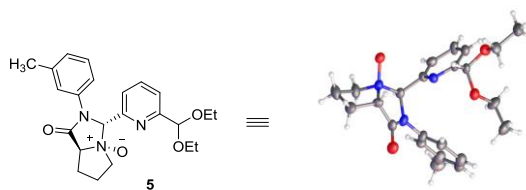

CCDC 2285109

**Table S3 Crystal data and structure refinement for 5**

|                                             |                                                               |
|---------------------------------------------|---------------------------------------------------------------|
| Identification code                         | 5                                                             |
| Empirical formula                           | C <sub>23</sub> H <sub>29</sub> N <sub>3</sub> O <sub>4</sub> |
| Formula weight                              | 411.49                                                        |
| Temperature/K                               | 170.00(10)                                                    |
| Crystal system                              | hexagonal                                                     |
| Space group                                 | P6 <sub>1</sub>                                               |
| a/Å, b/Å, c/Å                               | 25.6308(19), 25.6308(19), 13.8132(12)                         |
| α/°, β/°, γ/°                               | 90, 90, 120                                                   |
| Volume/Å <sup>3</sup>                       | 7858.7(14)                                                    |
| Z                                           | 12                                                            |
| ρ <sub>calc</sub> /cm <sup>3</sup>          | 1.043                                                         |
| μ/mm <sup>-1</sup>                          | 0.584                                                         |
| F(000)                                      | 2640.0                                                        |
| Radiation                                   | Cu Kα (λ = 1.54184)                                           |
| Crystal size/mm <sup>3</sup>                | 0.13 × 0.12 × 0.1                                             |
| 2θ range for data collection/°              | 6.898 to 150.376                                              |
| Index ranges                                | -31 ≤ h ≤ 23, -21 ≤ k ≤ 31, -16 ≤ l ≤ 15                      |
| Reflections collected                       | 56884                                                         |
| Independent reflections                     | 9885 [R <sub>int</sub> = 0.1950, R <sub>sigma</sub> = 0.1617] |
| Data/restraints/parameters                  | 9885/487/548                                                  |
| Goodness-of-fit on F <sup>2</sup>           | 0.816                                                         |
| Final R indexes [I >= 2σ(I)]                | R <sub>1</sub> = 0.0868, wR <sub>2</sub> = 0.2073             |
| Final R indexes [all data]                  | R <sub>1</sub> = 0.1523, wR <sub>2</sub> = 0.2298             |
| Largest diff. peak/hole / e Å <sup>-3</sup> | 0.81/-0.29                                                    |
| Flack parameter                             | 0.8(4)                                                        |

**Crystal Data** for C<sub>23</sub>H<sub>29</sub>N<sub>3</sub>O<sub>4</sub> (*M* = 411.49 g/mol): hexagonal, space group P6<sub>1</sub> (no. 169), *a* = 25.6308(19) Å, *c* = 13.8132(12) Å, *V* = 7858.7(14) Å<sup>3</sup>, *Z* = 12, *T* = 170.00(10) K, μ(Cu Kα) = 0.584 mm<sup>-1</sup>, *D*<sub>calc</sub> = 1.043 g/cm<sup>3</sup>, 56884 reflections measured (6.898° ≤ 2θ ≤ 150.376°), 9885 unique (*R*<sub>int</sub> = 0.1950, *R*<sub>sigma</sub> = 0.1617) which were used in all calculations. The final *R*<sub>1</sub> was 0.0868 (*I* > 2σ(*I*)) and *wR*<sub>2</sub> was 0.2298 (all data).

## 8. References

- (a) Y. Liu, D. Shang, X. Zhou, Y. Zhu, L. Lin, X. Liu and X. Feng, *Org. Lett.*, 2010, **12**, 180-183; (b) S. Yu, Q. Cai, C. Wang, J. Hou, J. Liang, Z. Jiao, C. Yao and Y. M. Li, *J. Org. Chem.*, 2023, **88**, 3046-3053; (c) V. Juste-Navarro, E. Marqués-López and R. P. Herrera, *Asian J. Org. Chem.*, 2015, **4**, 884-889; (d) M. Wang, M. Li, L. Zhang, R. Song, D. Yang and J. Lv, *Org. Chem. Front.*, 2022, **9**, 1875-1883.

9. The copies of  $^1\text{H}$  NMR,  $^{13}\text{C}$  NMR and HPLC spectra for compounds L, 4, 5 and 8

$^1\text{H}$  and  $^{13}\text{C}$  NMR of L1a

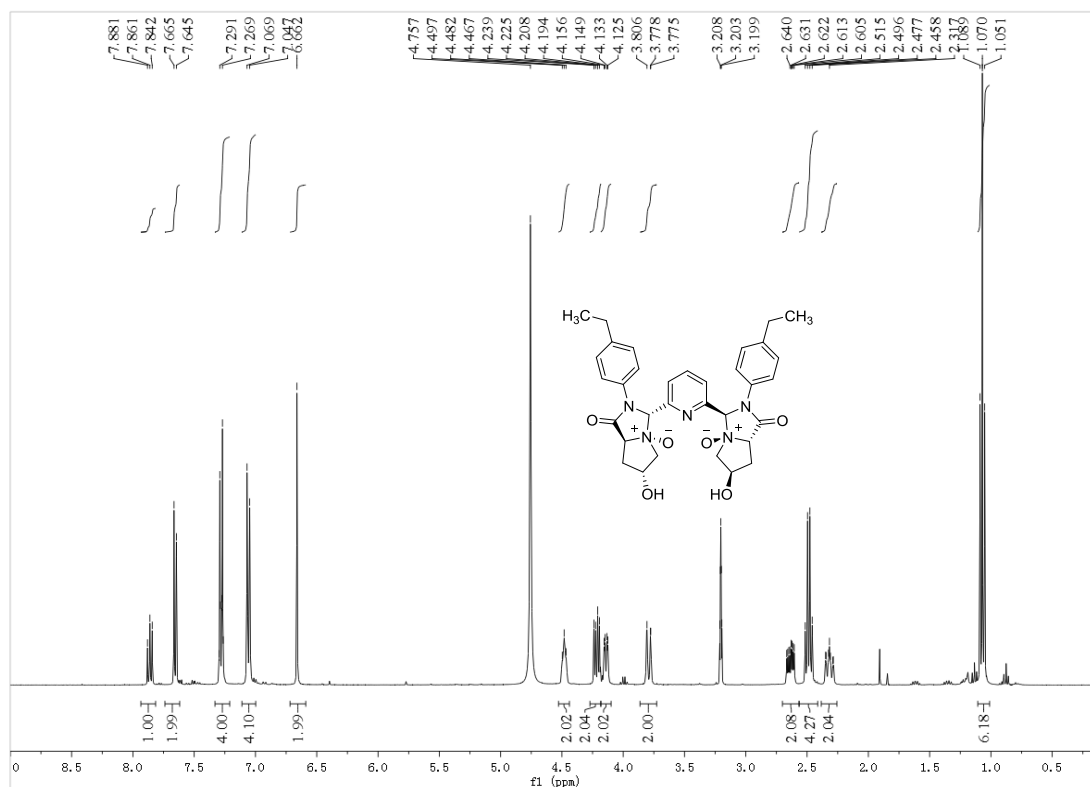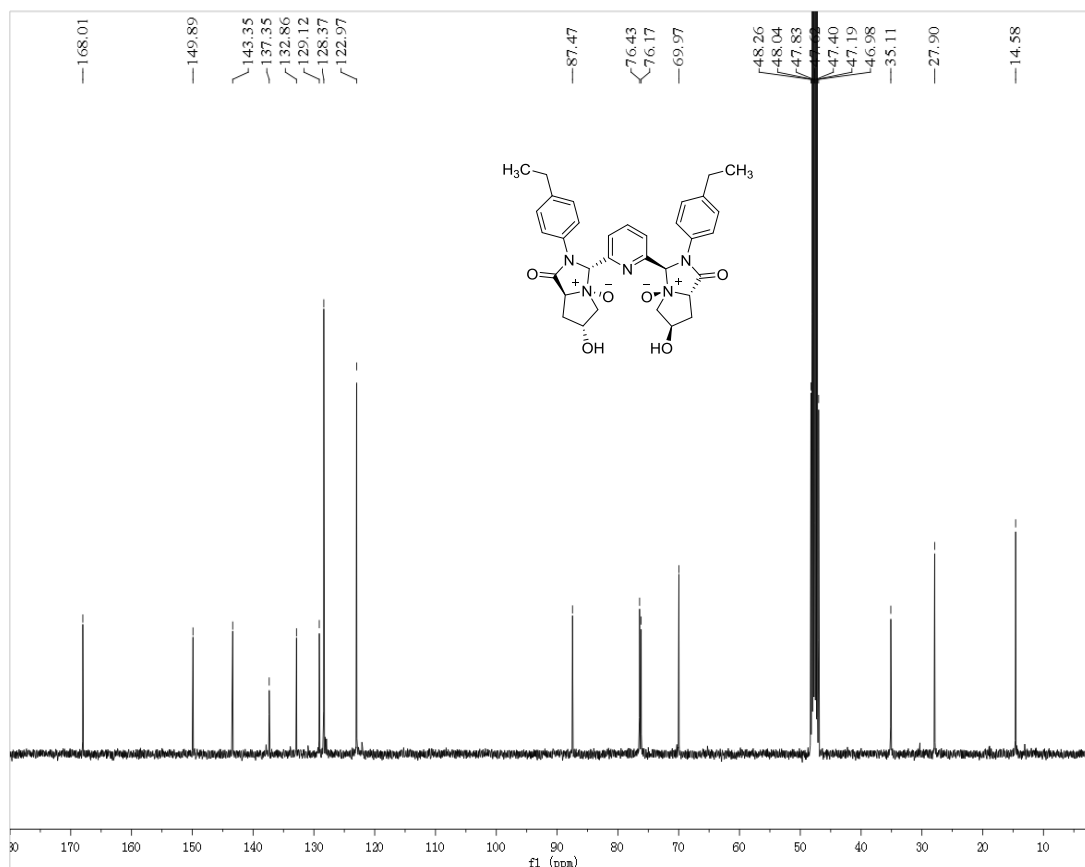

# $^1\text{H}$ and $^{13}\text{C}$ NMR of L1b

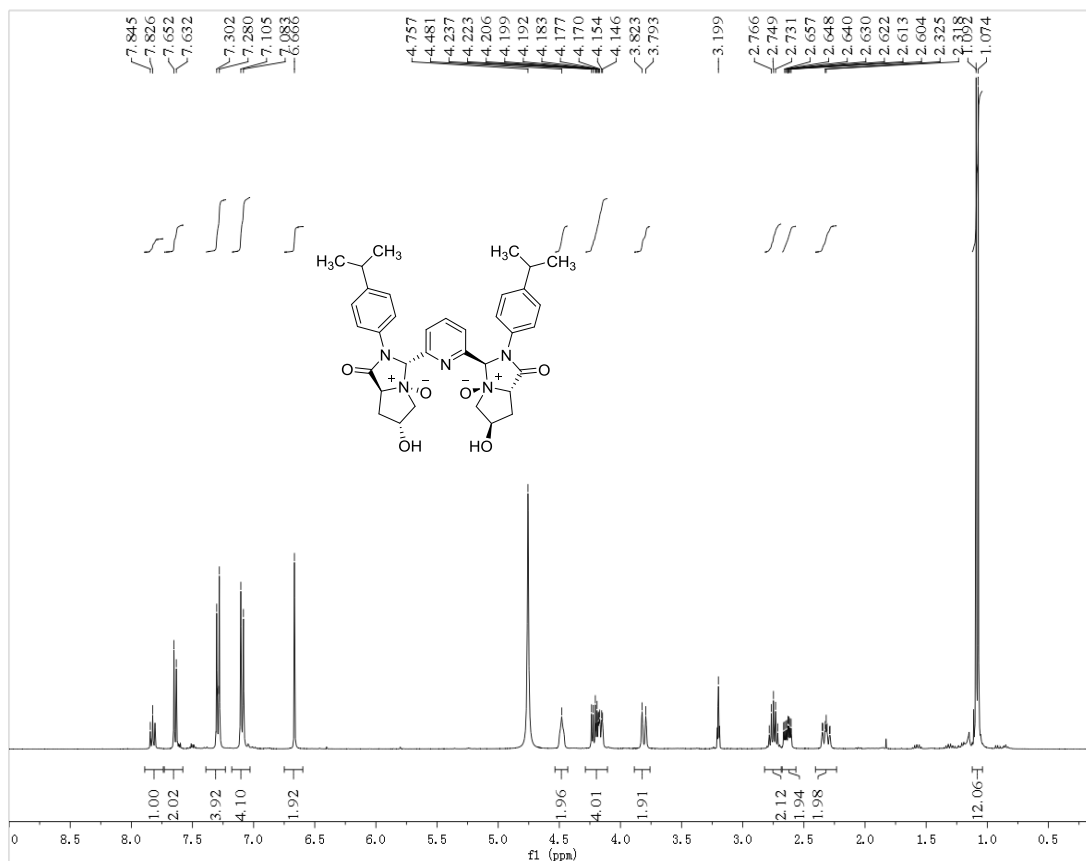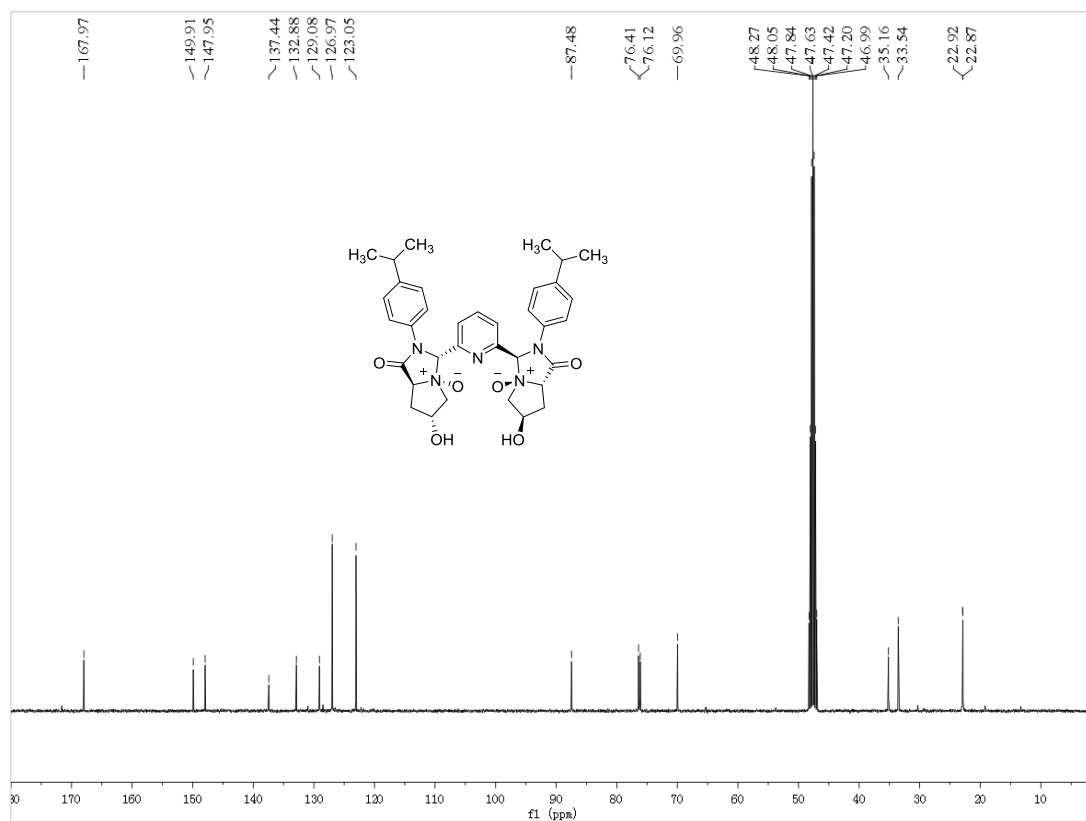

# <sup>1</sup>H and <sup>13</sup>C NMR of L1c

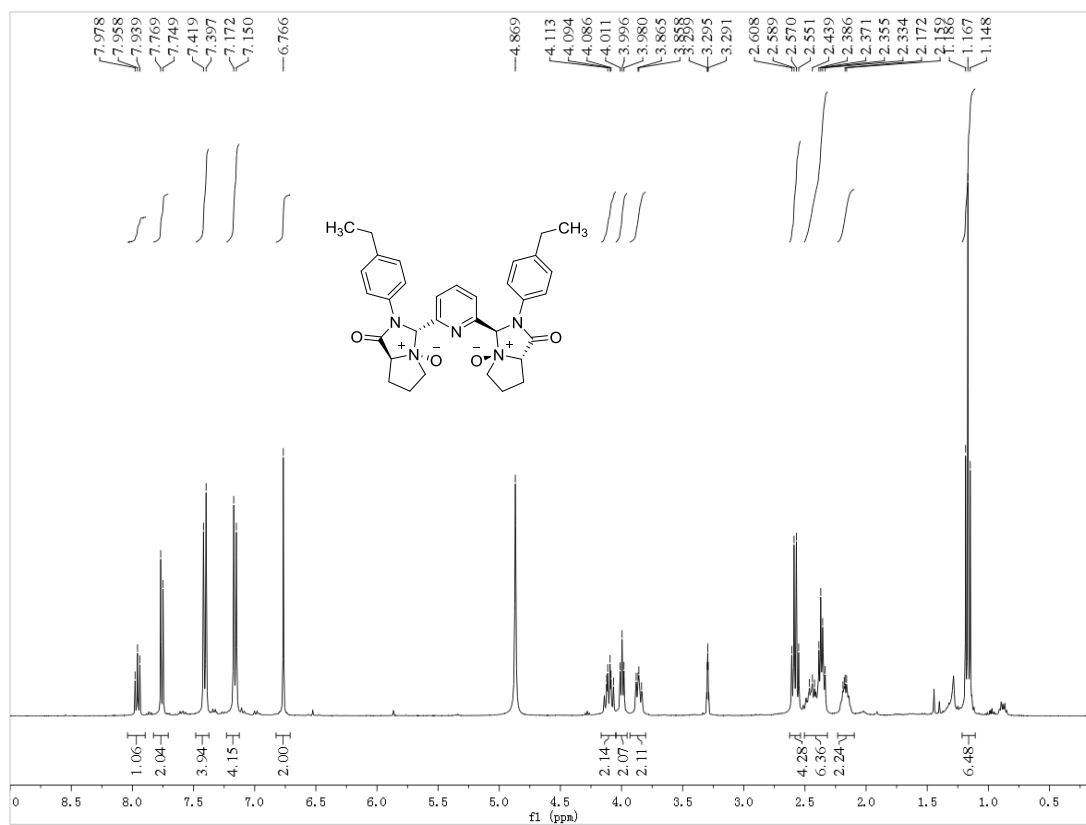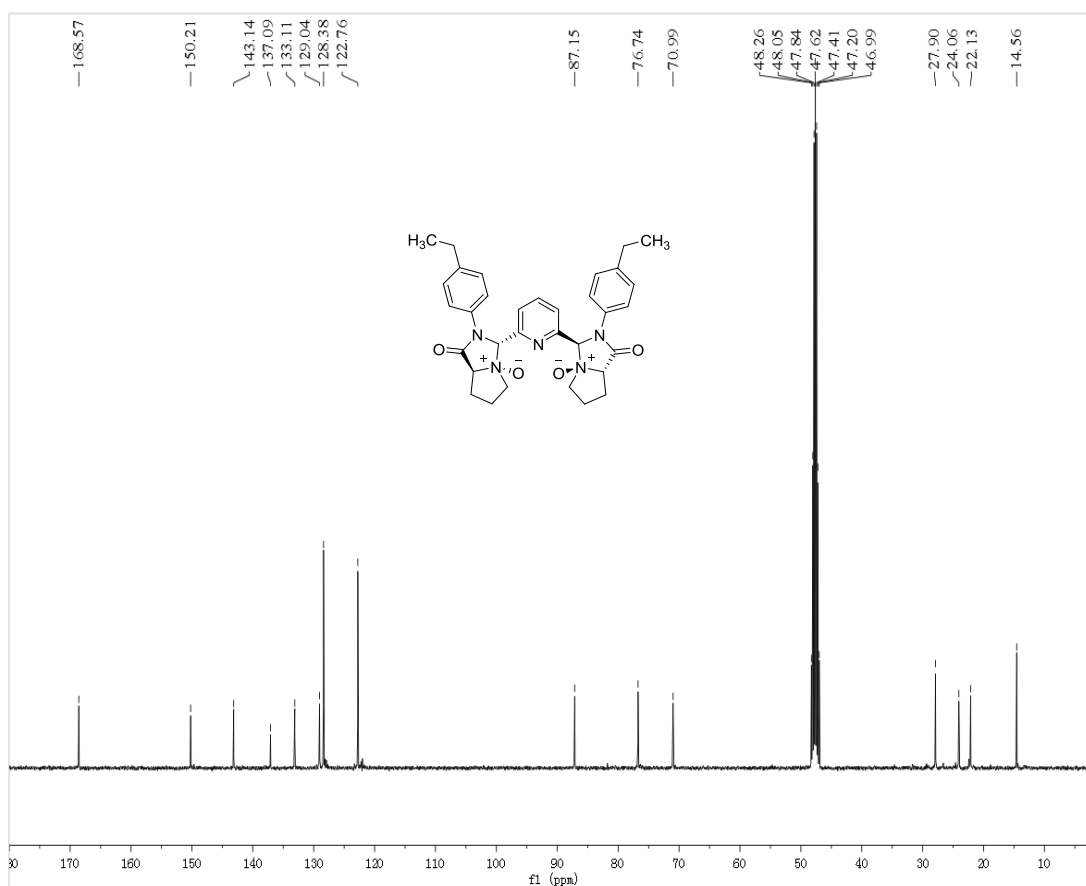

# $^1\text{H}$ and $^{13}\text{C}$ NMR of L1d

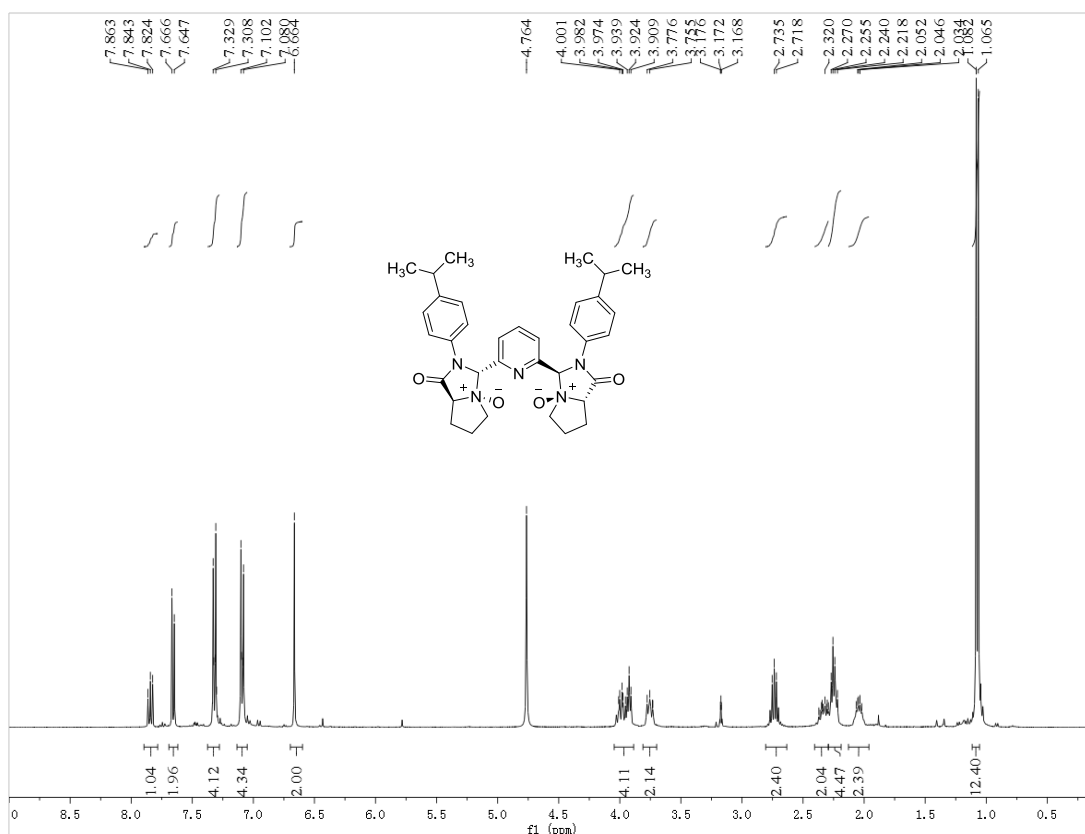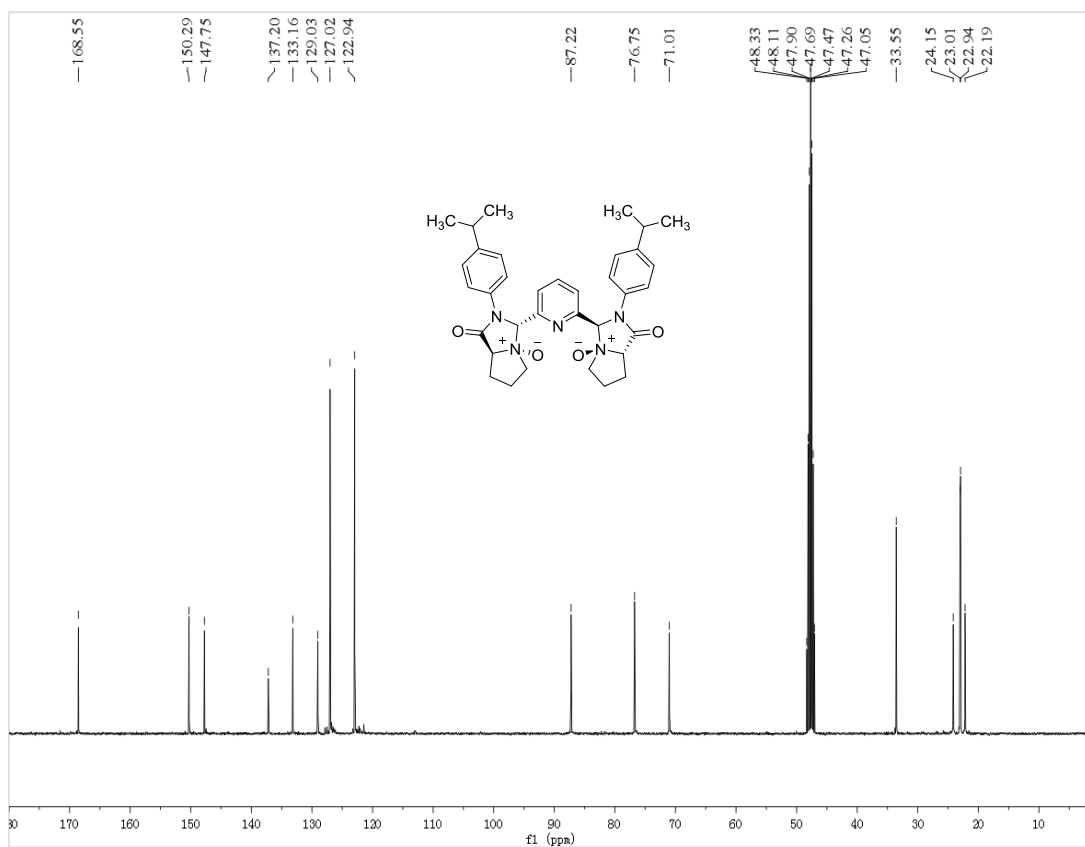

# $^1\text{H}$ and $^{13}\text{C}$ NMR of L1e

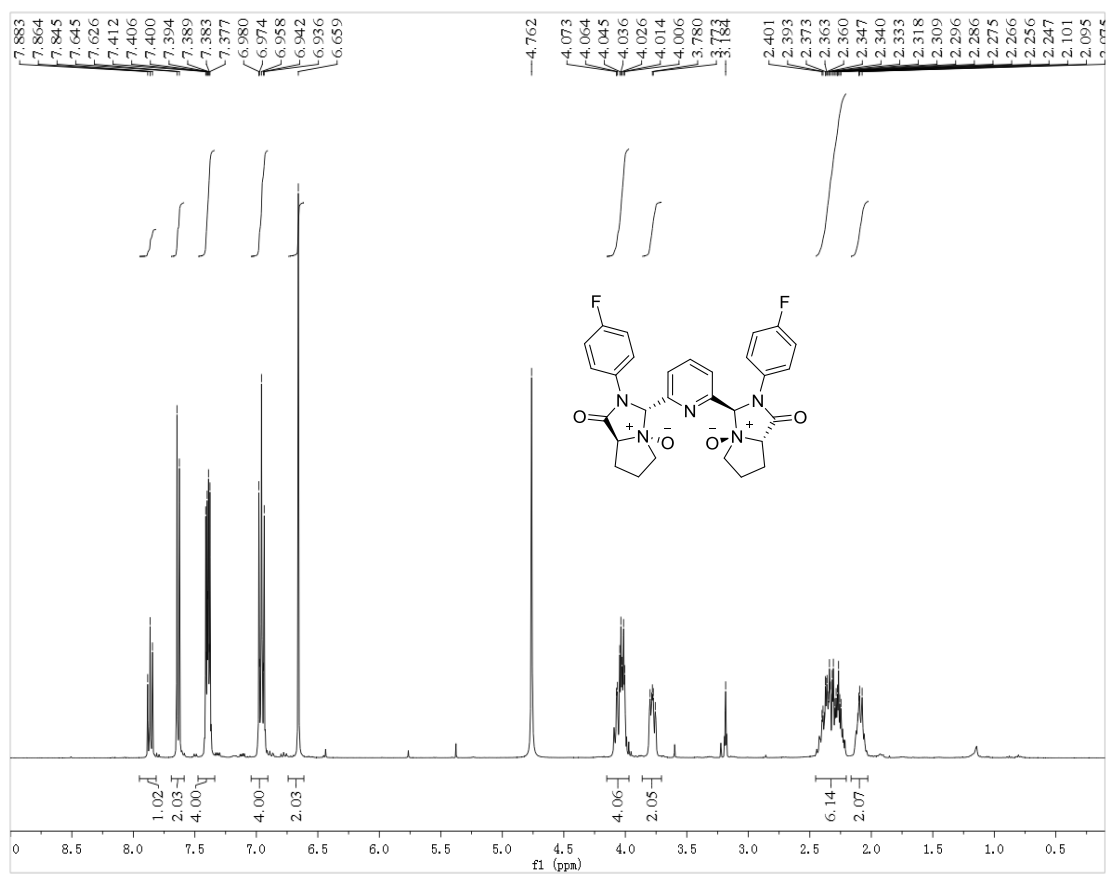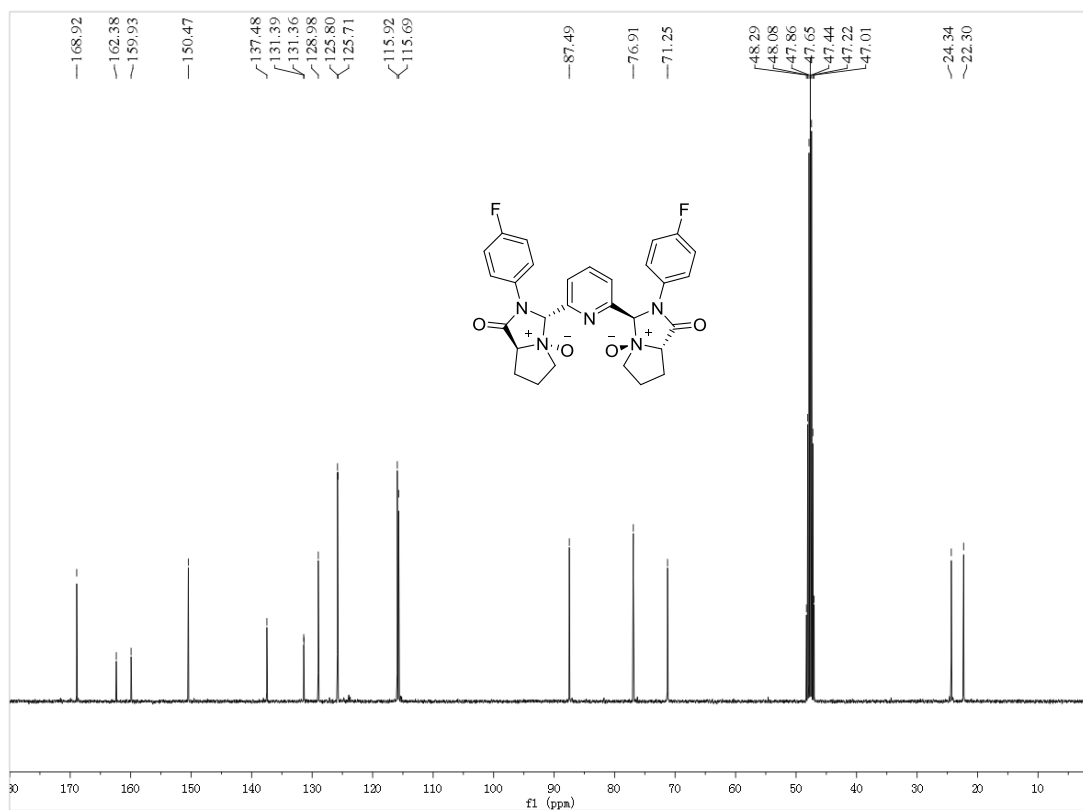

# $^1\text{H}$ and $^{13}\text{C}$ NMR of L1f

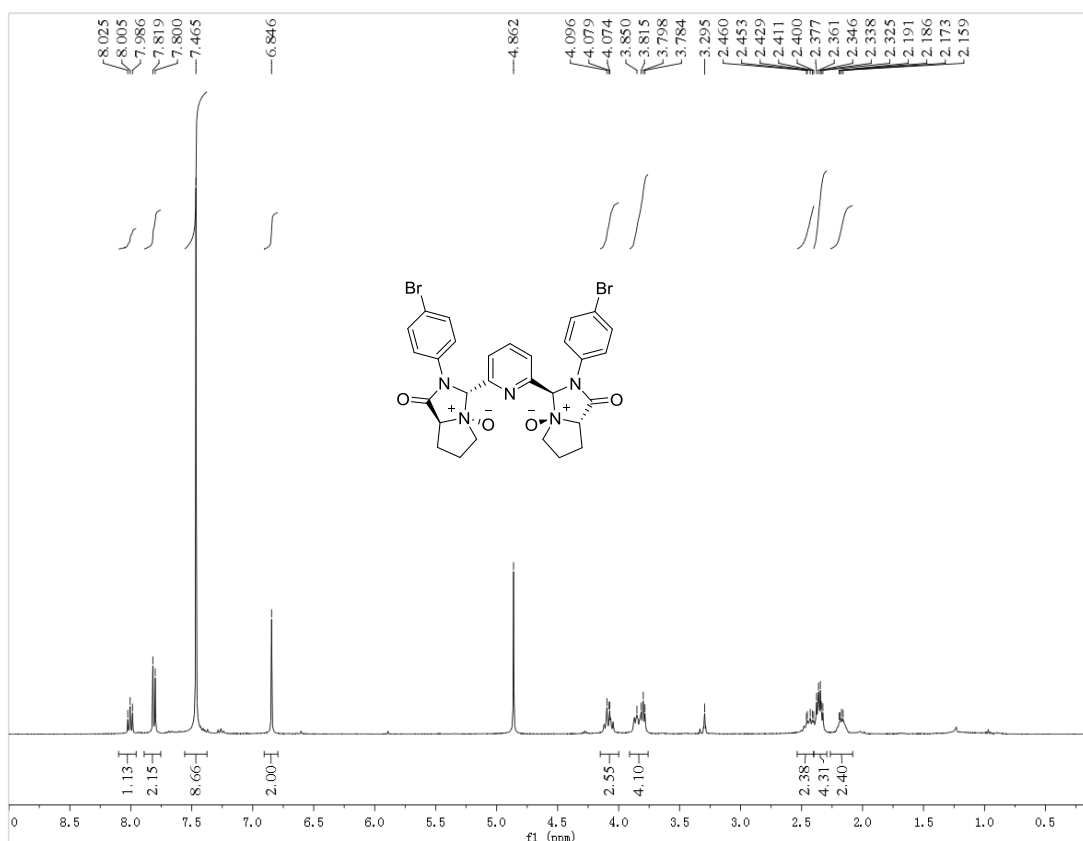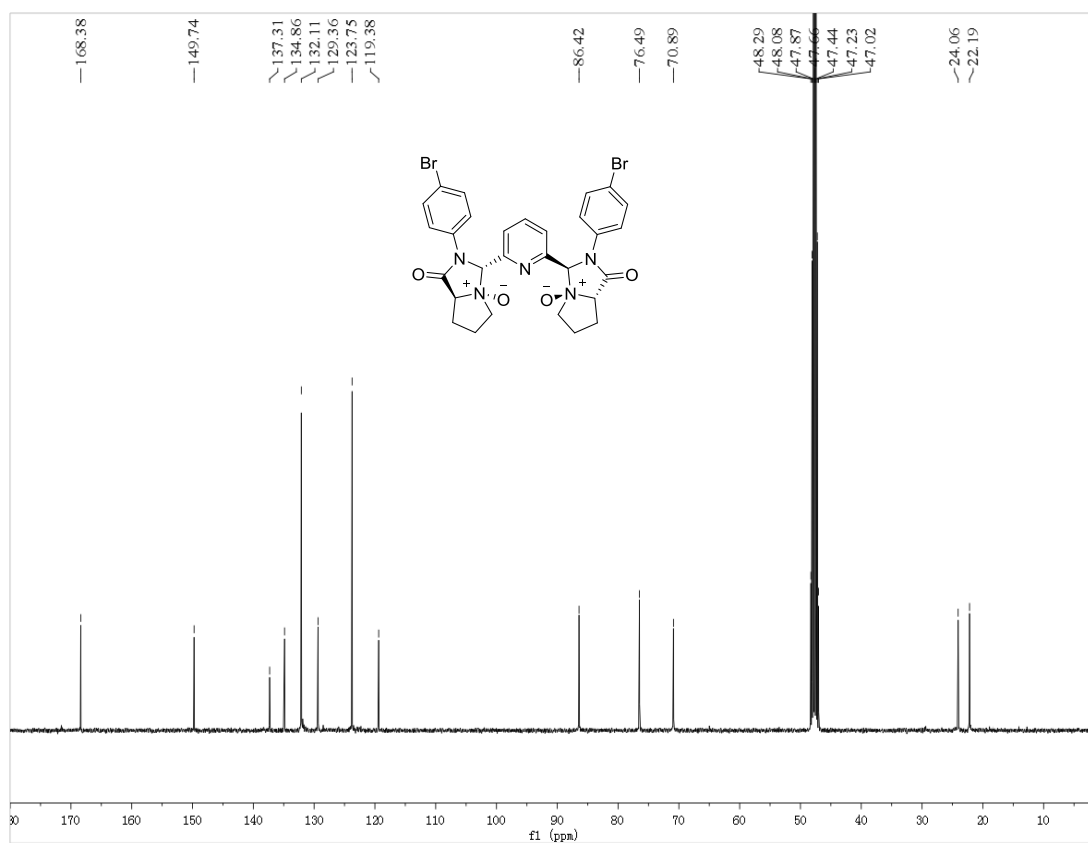



# $^1\text{H}$ and $^{13}\text{C}$ NMR of L3g

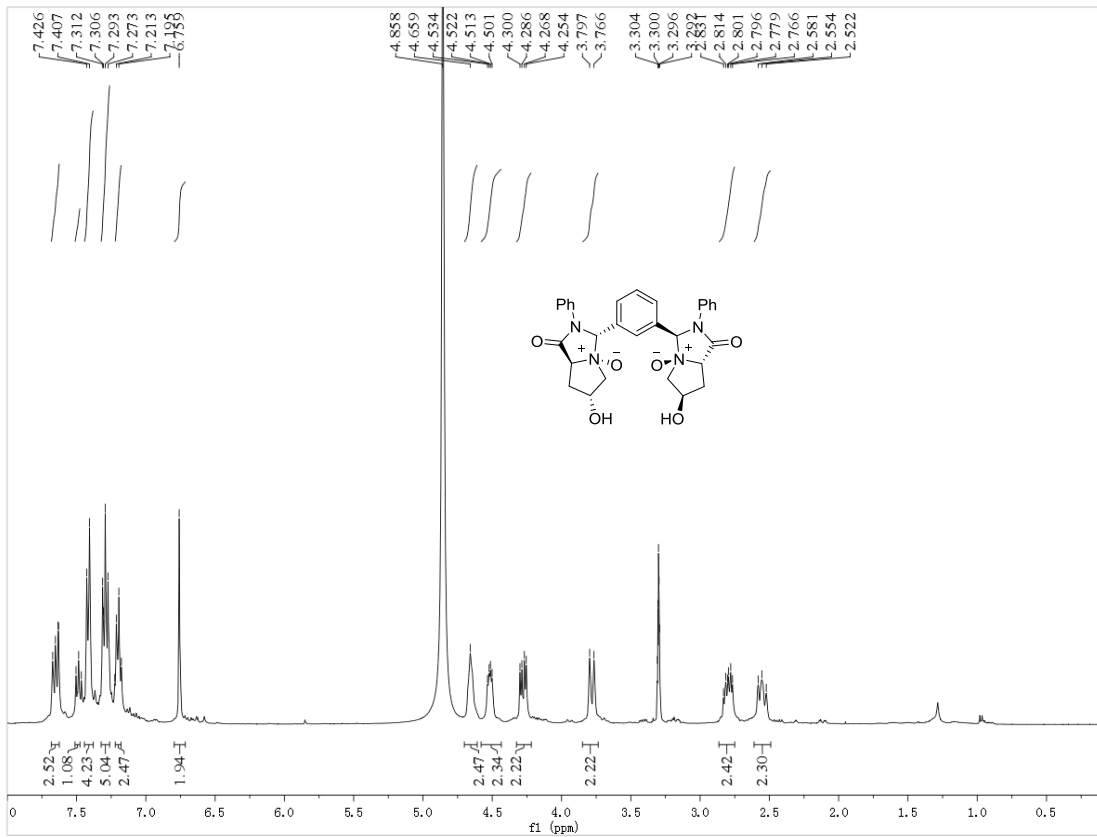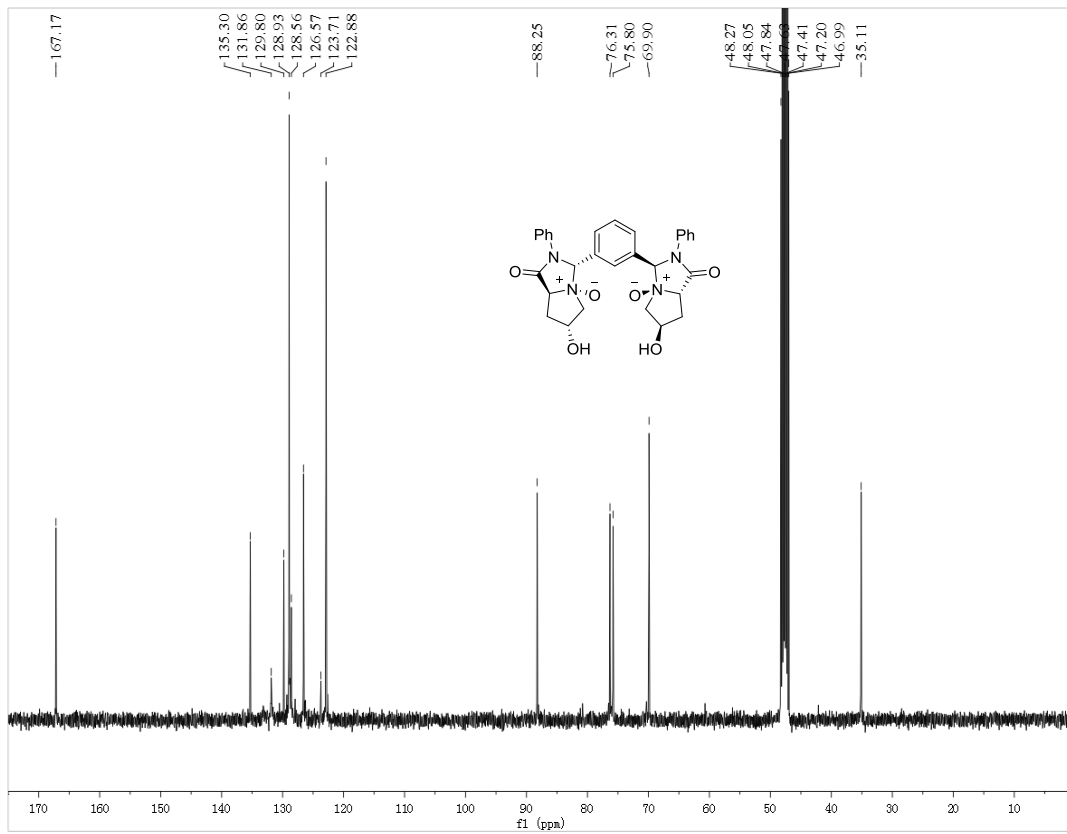

# $^1\text{H}$ and $^{13}\text{C}$ NMR of L4g

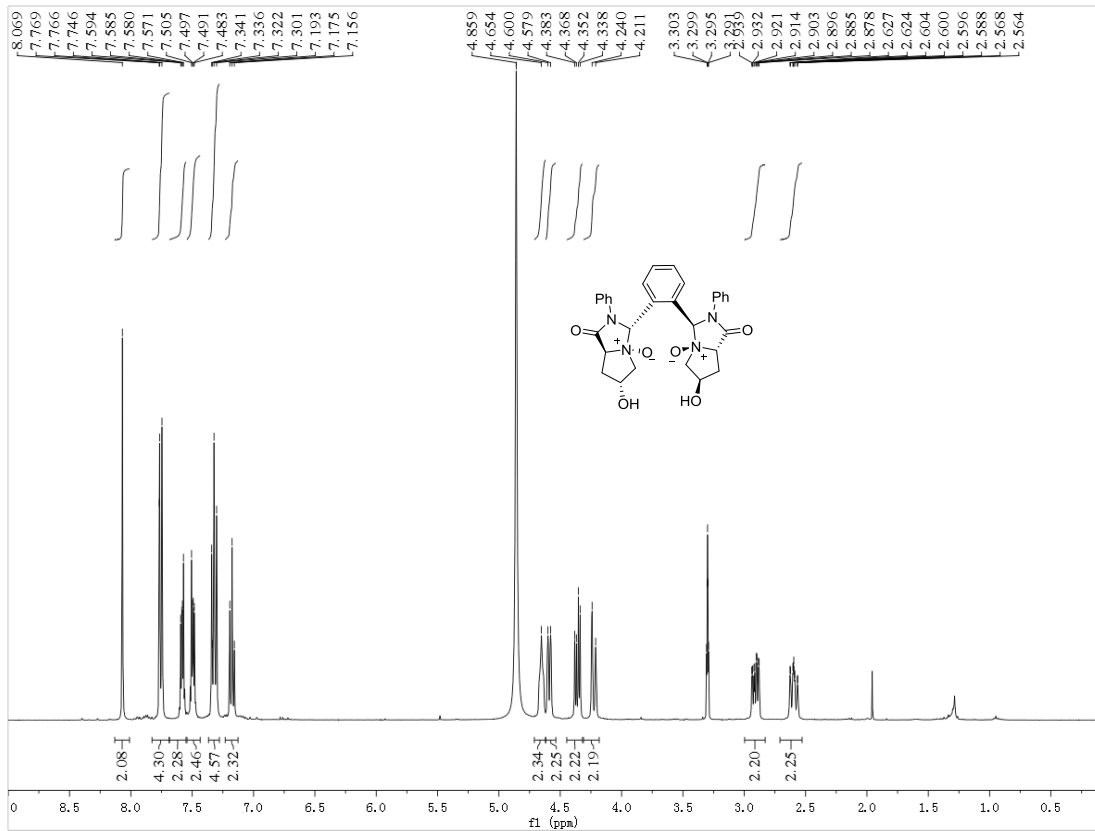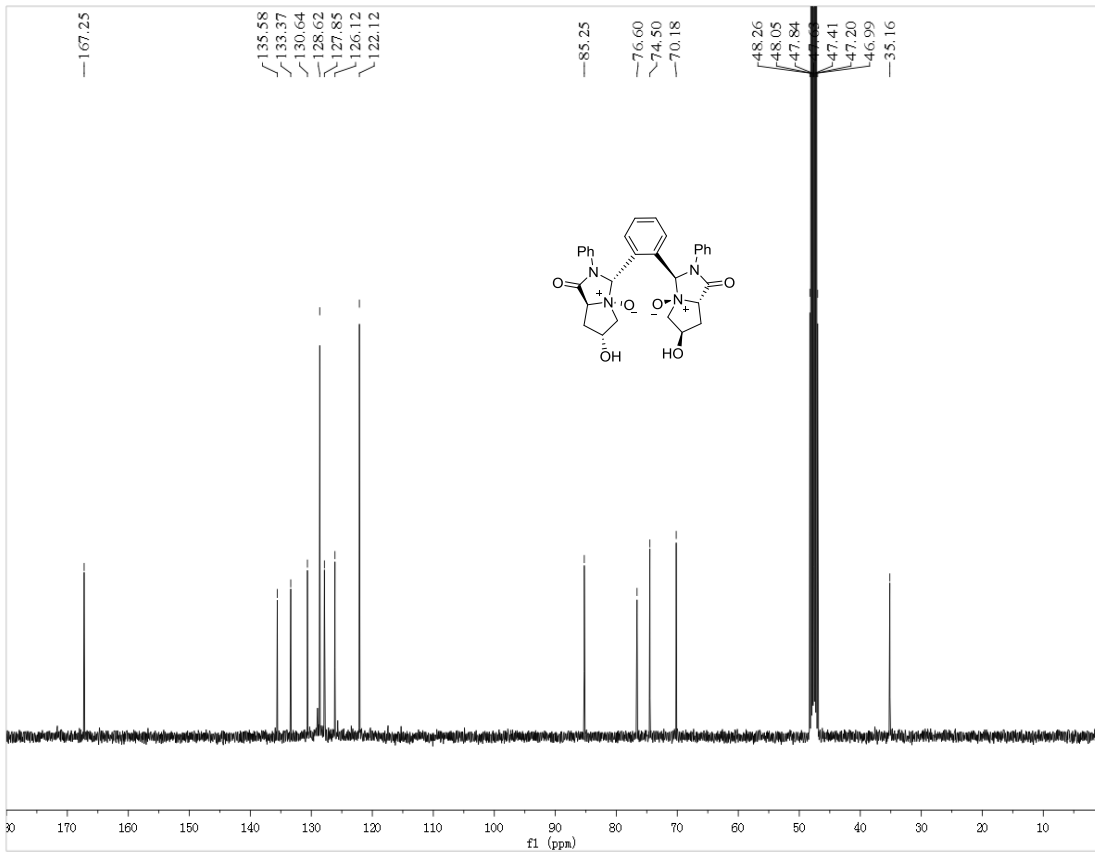

# <sup>1</sup>H and <sup>13</sup>C NMR of 4

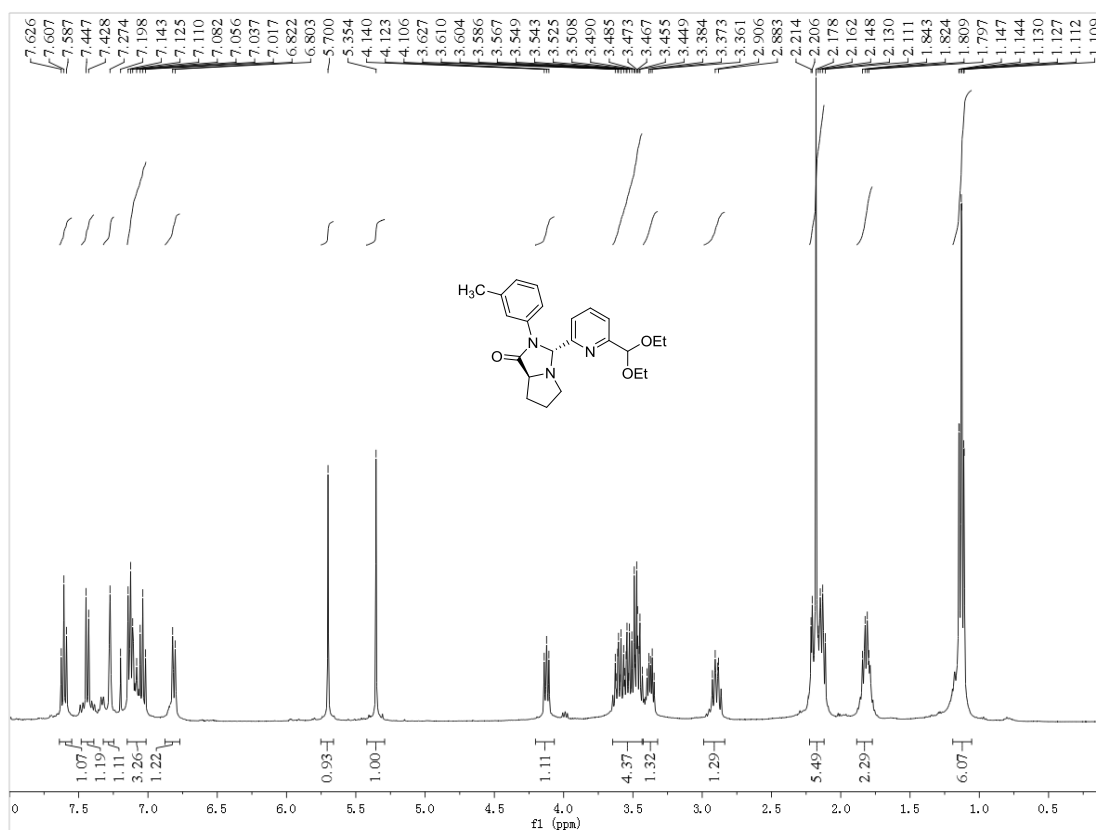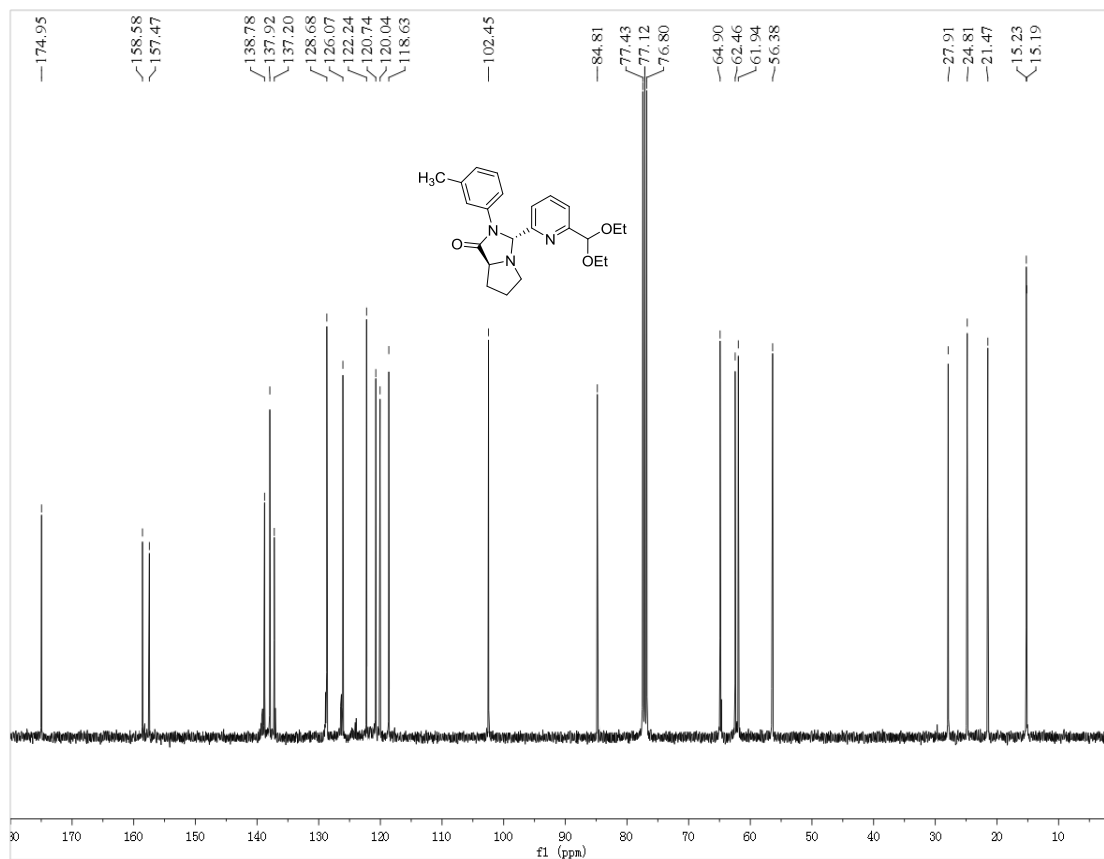

# <sup>1</sup>H and <sup>13</sup>C NMR of 5

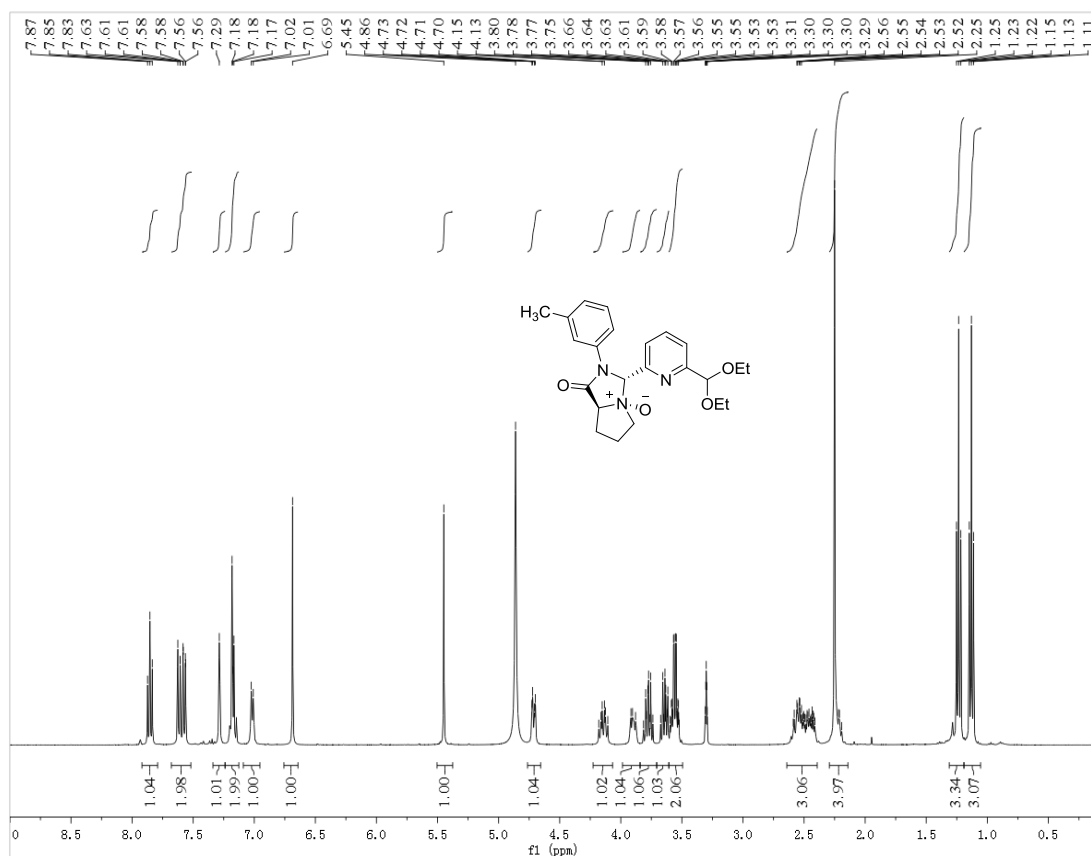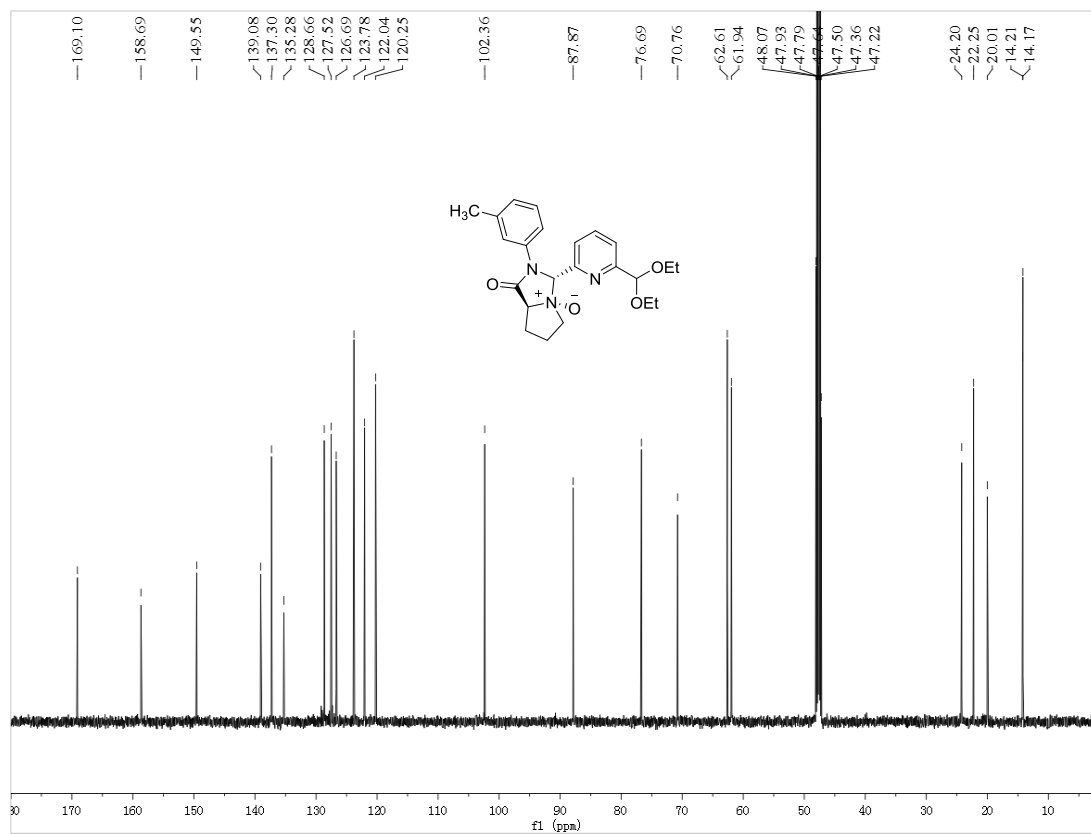

# <sup>1</sup>H and <sup>13</sup>C NMR of 8a

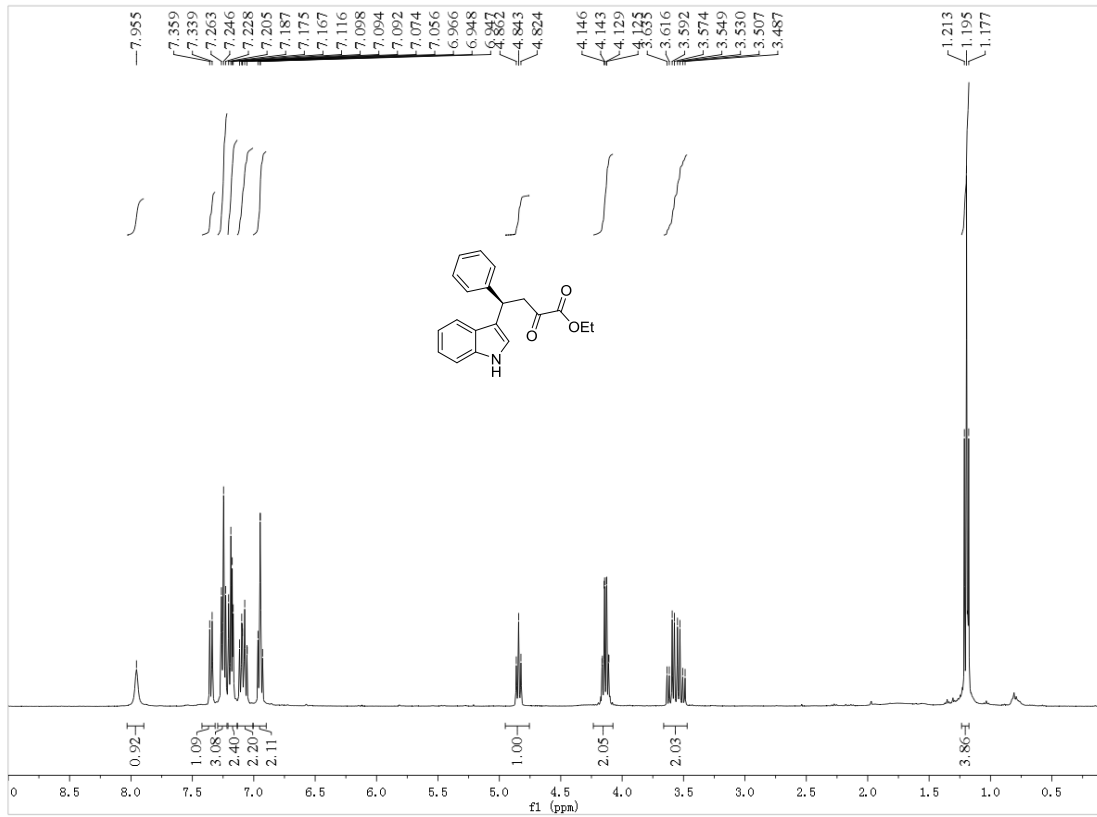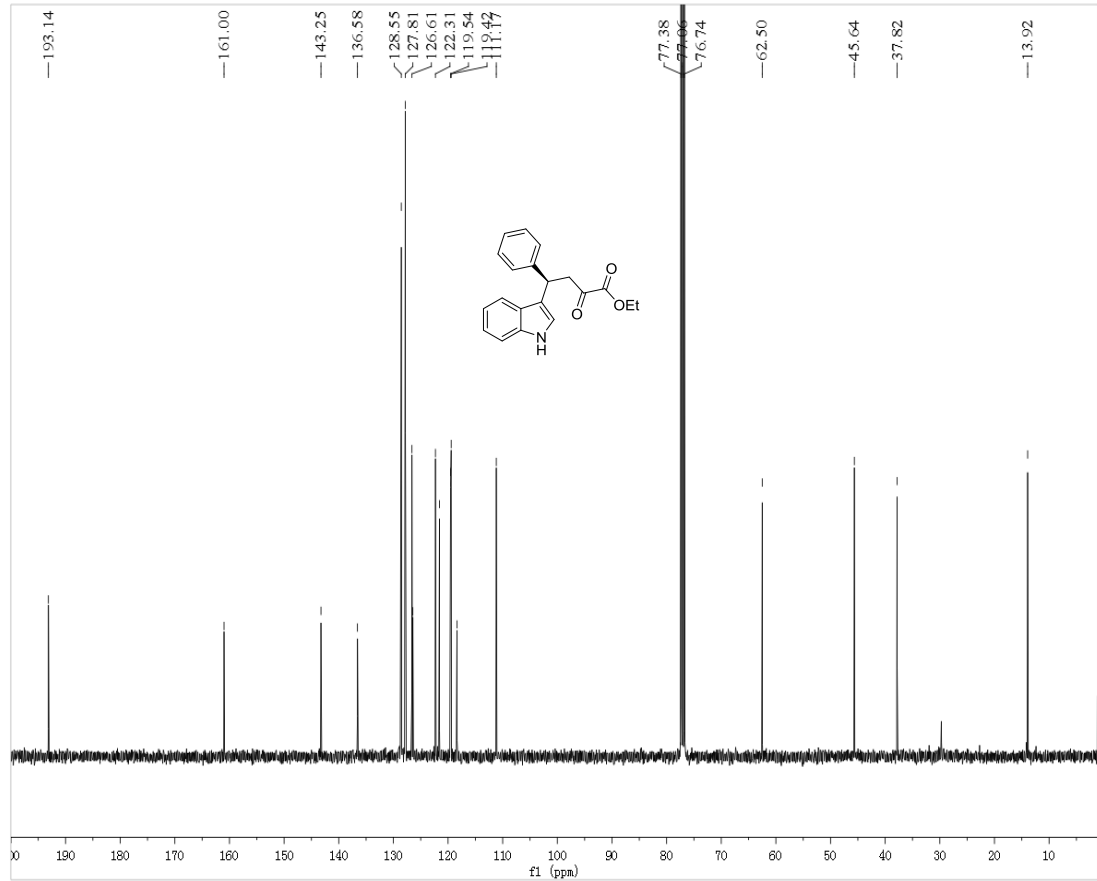

## HPLC of 8a

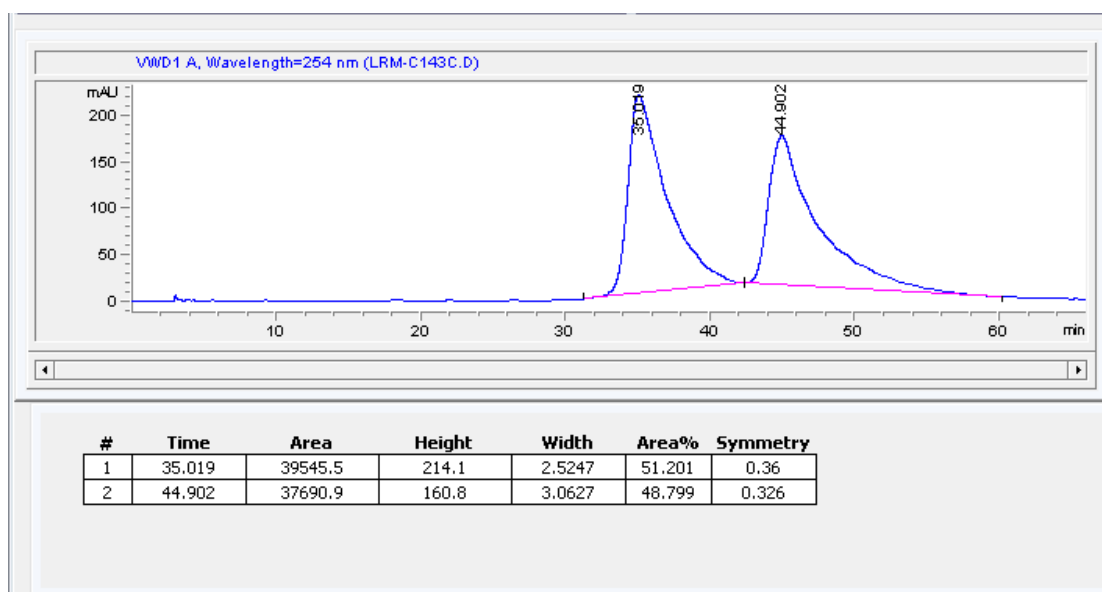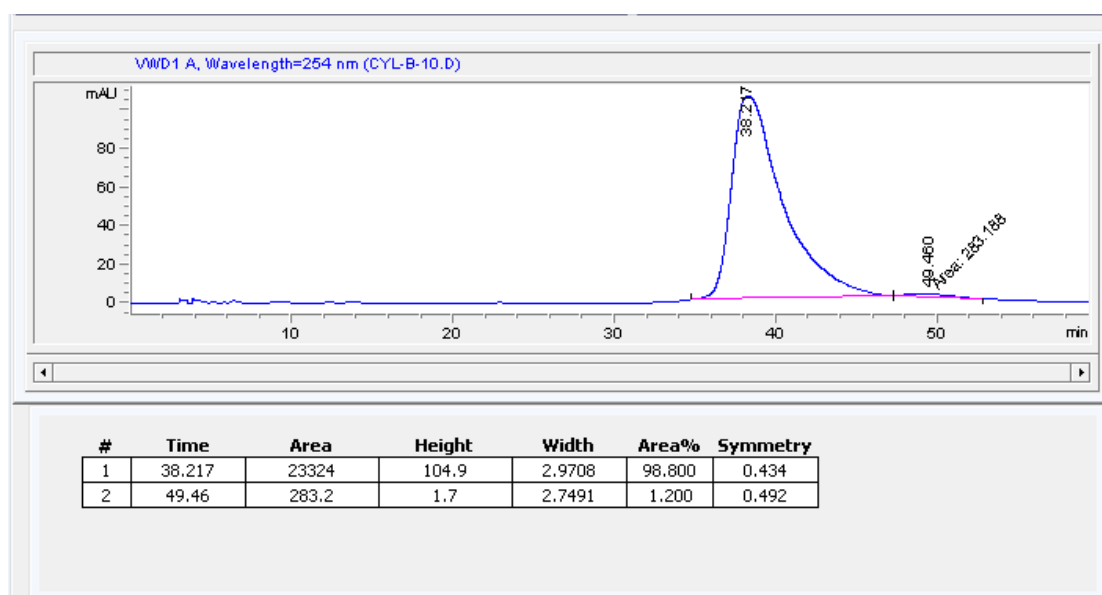

# <sup>1</sup>H and <sup>13</sup>C NMR of 8b

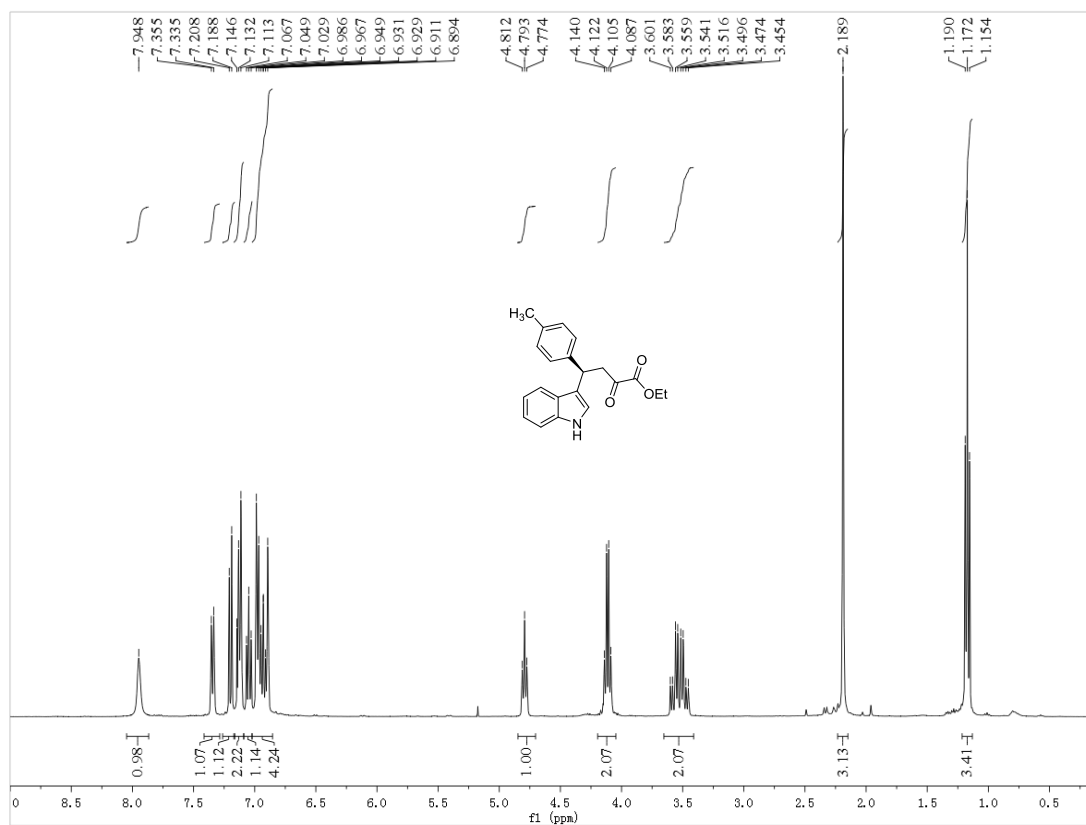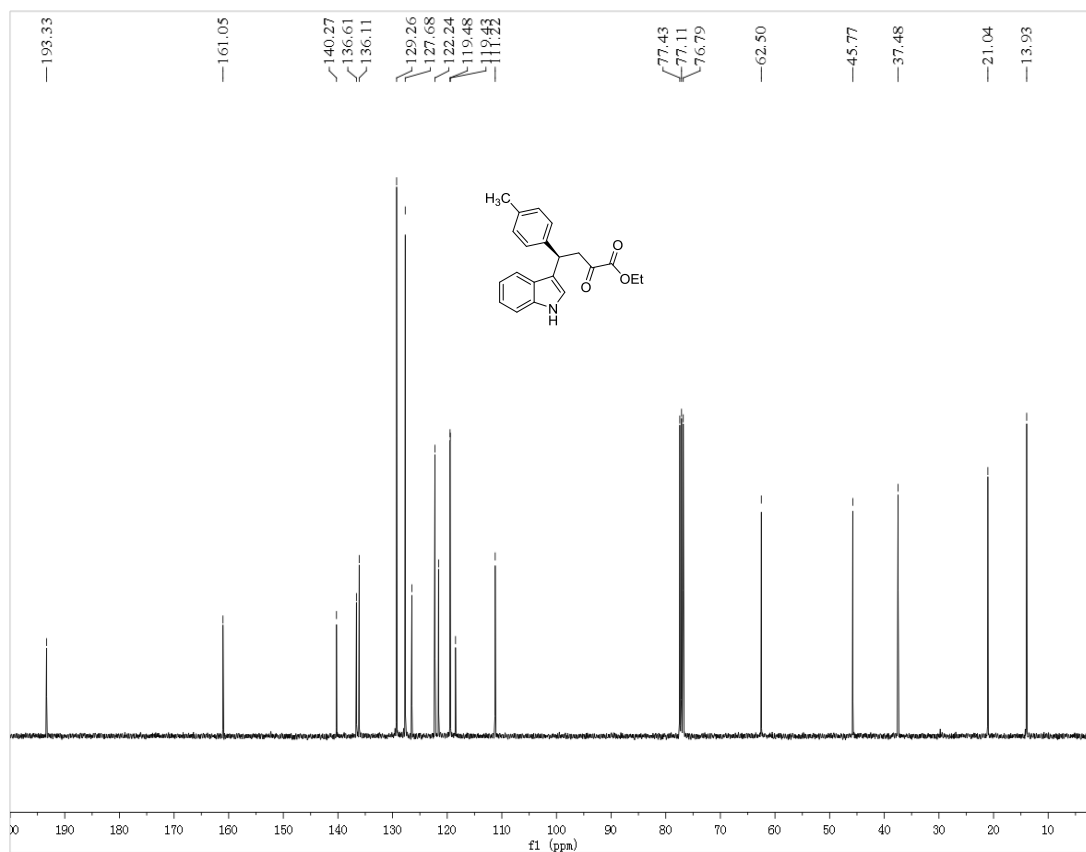

## HPLC of 8b

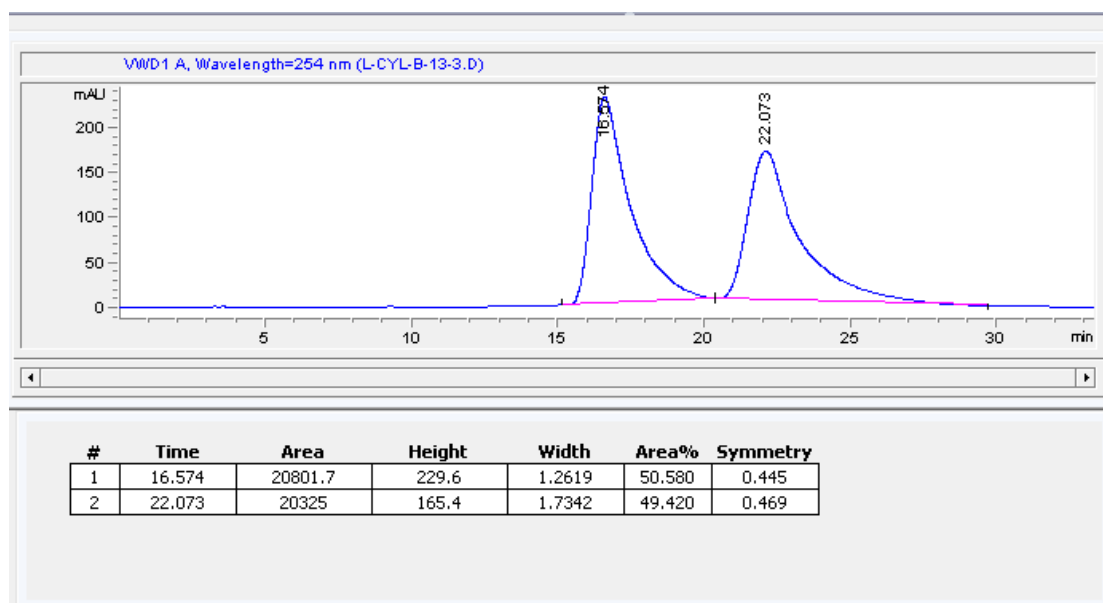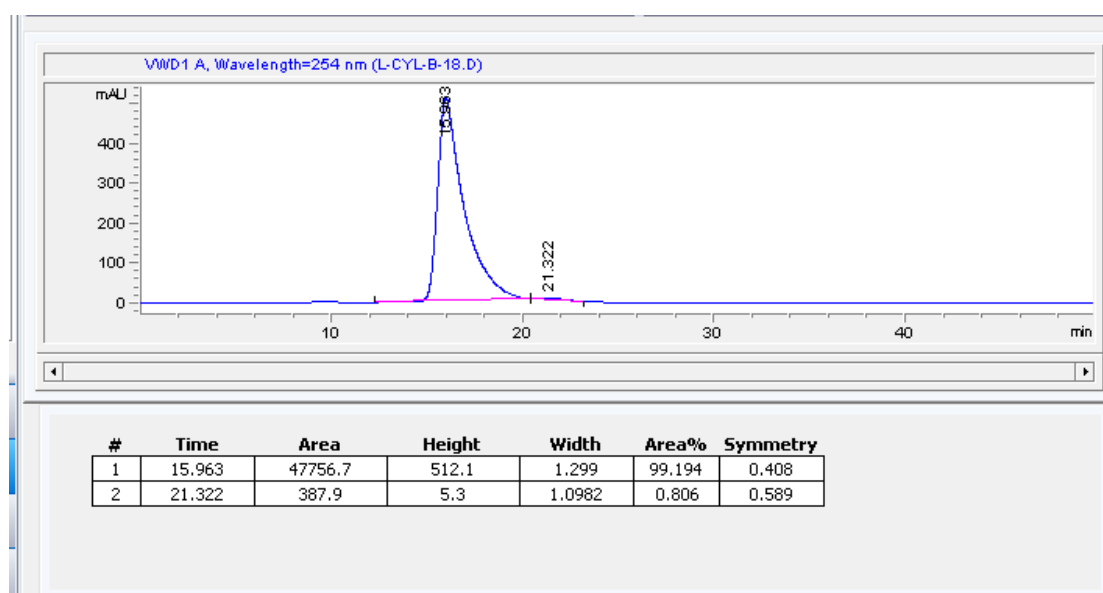



<sup>1</sup>H and <sup>13</sup>C NMR of 8c

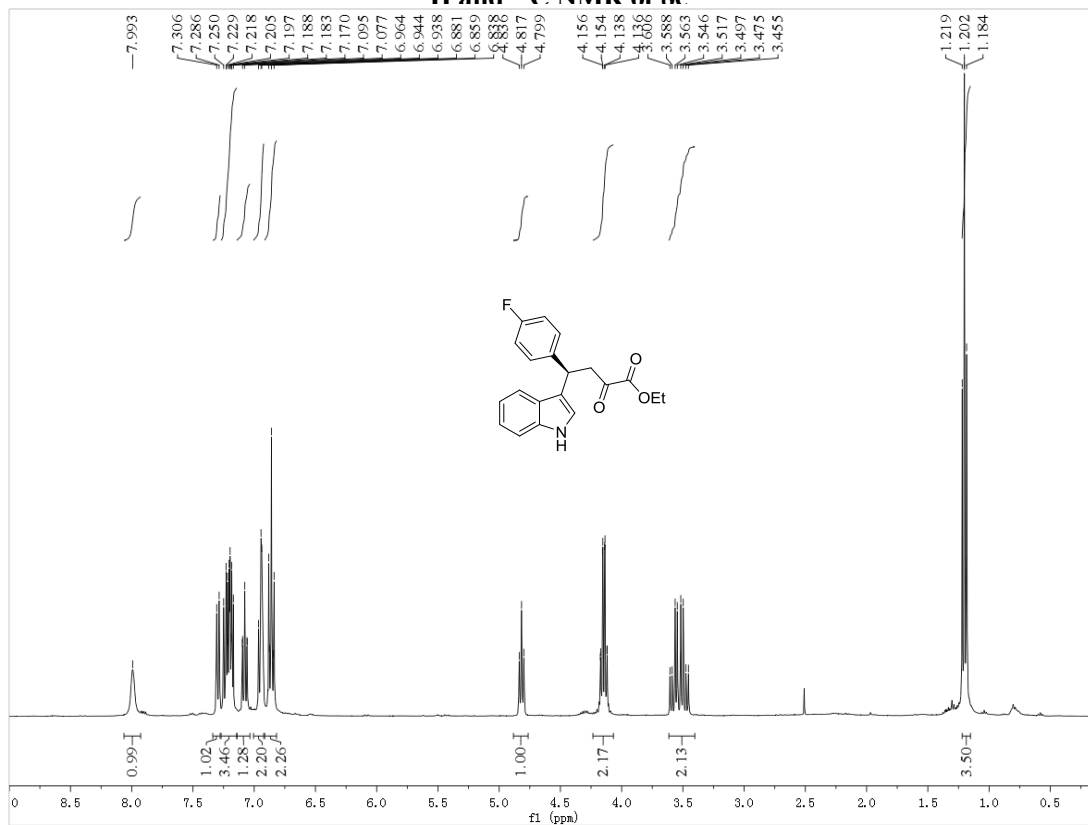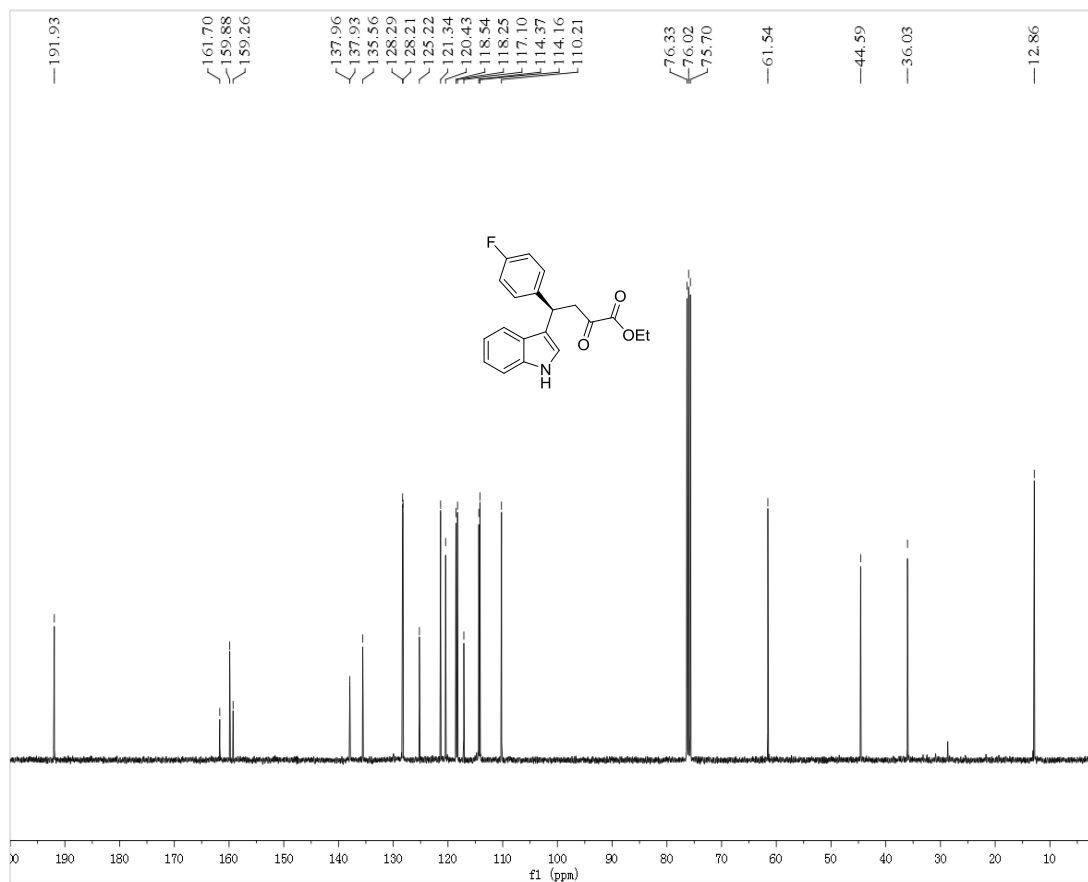

## HPLC of 8c

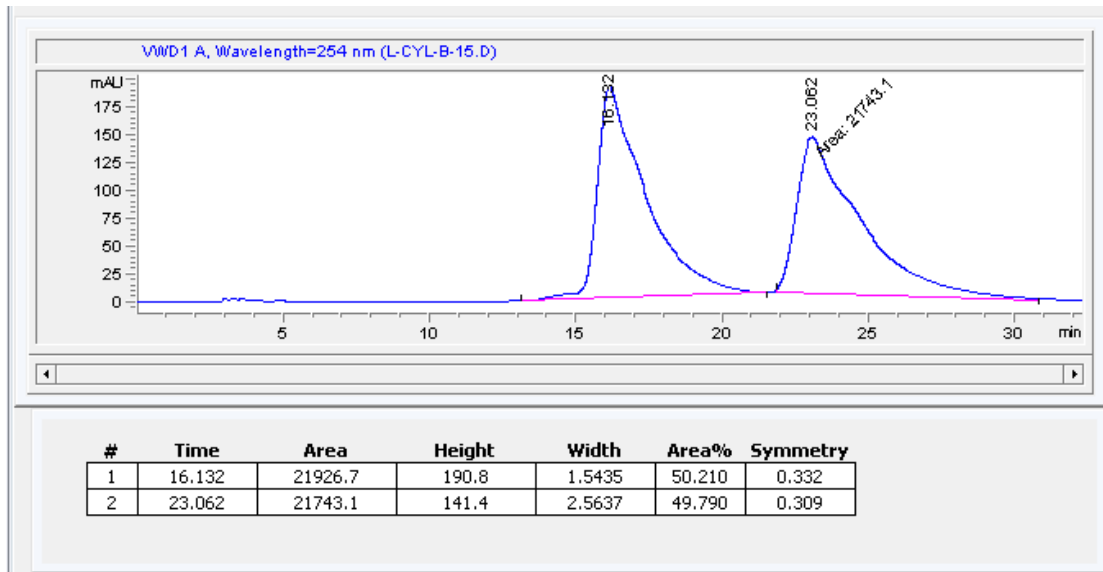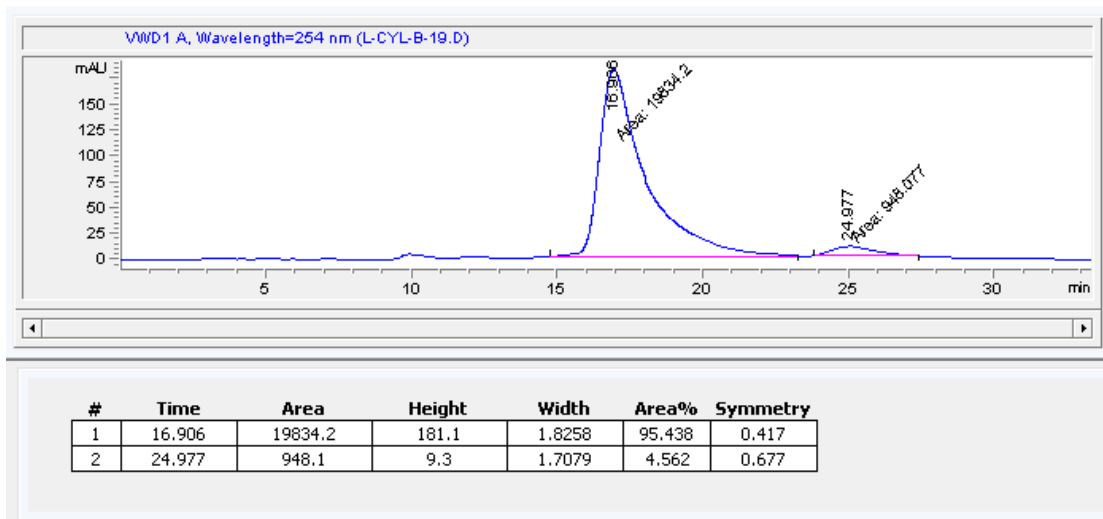

# $^1\text{H}$ and $^{13}\text{C}$ NMR of 8d

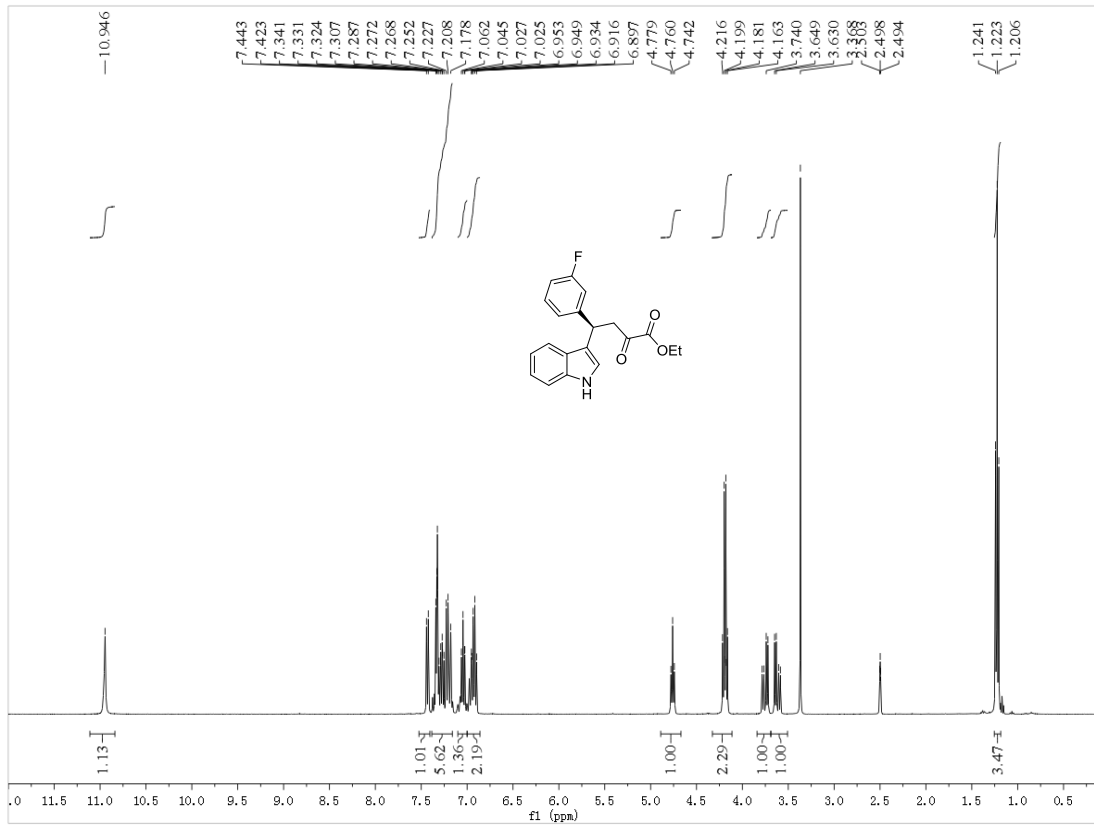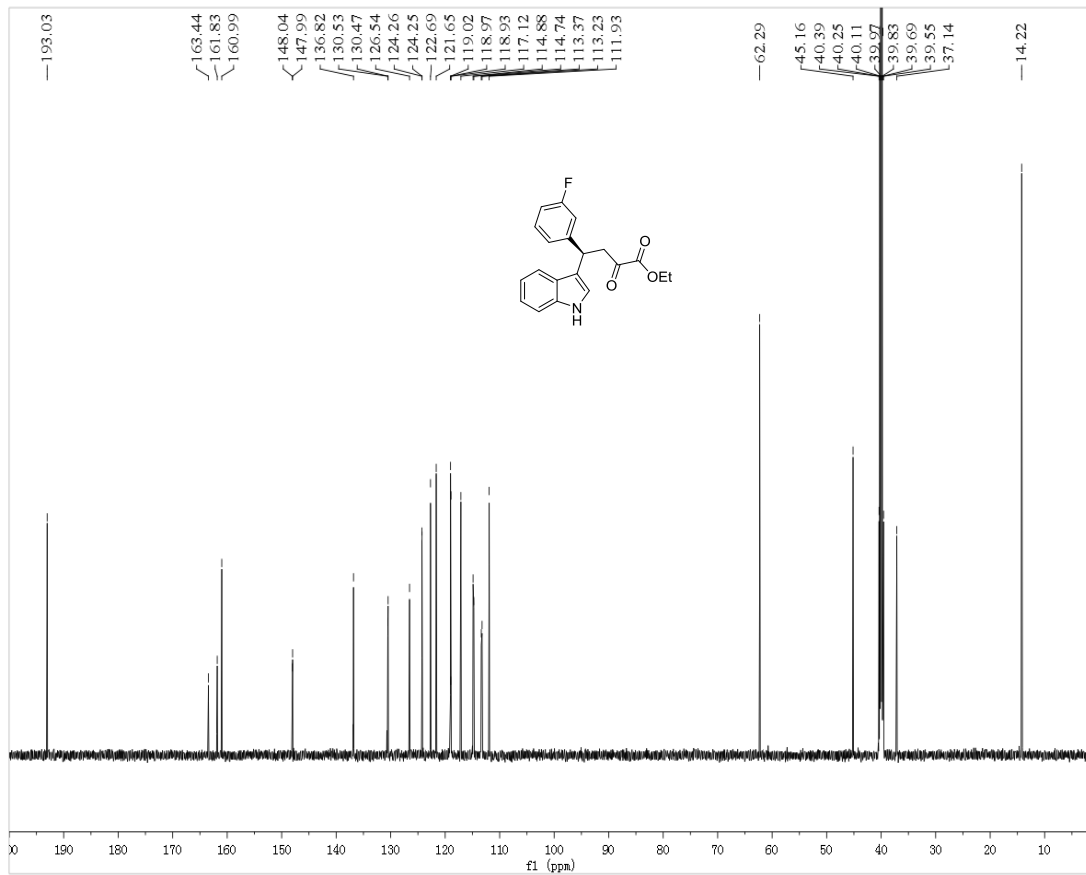

### HPLC of 8d

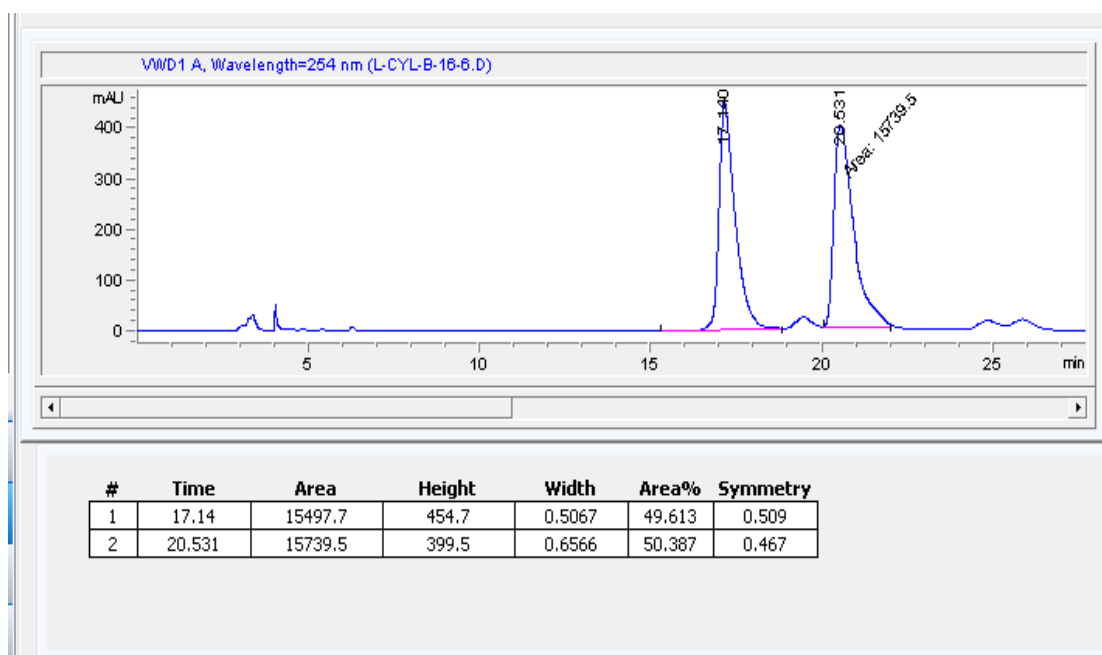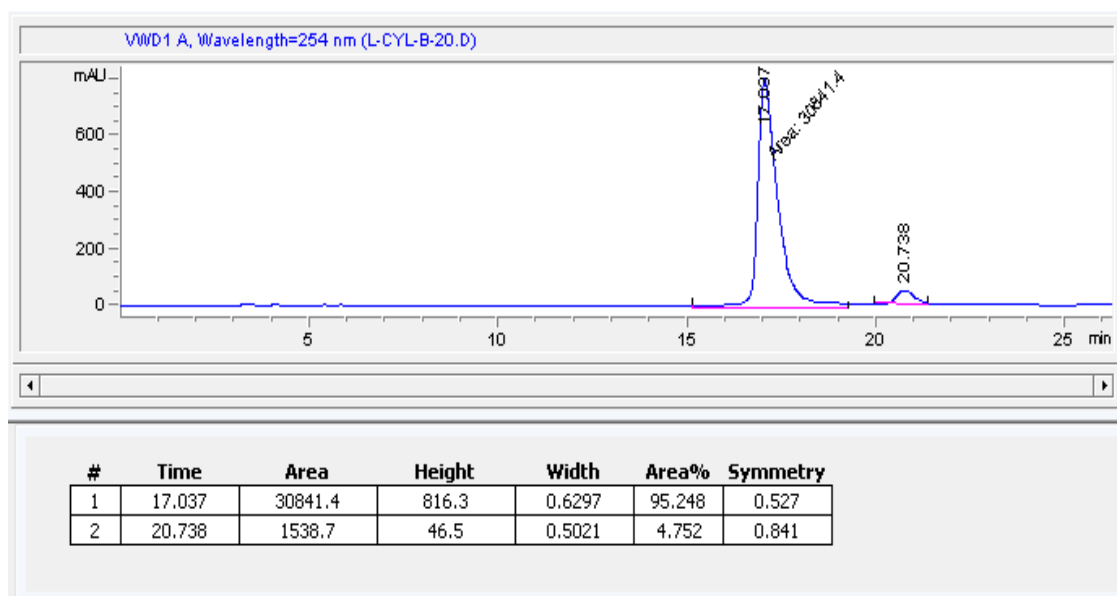

# $^1\text{H}$ and $^{13}\text{C}$ NMR of 8e

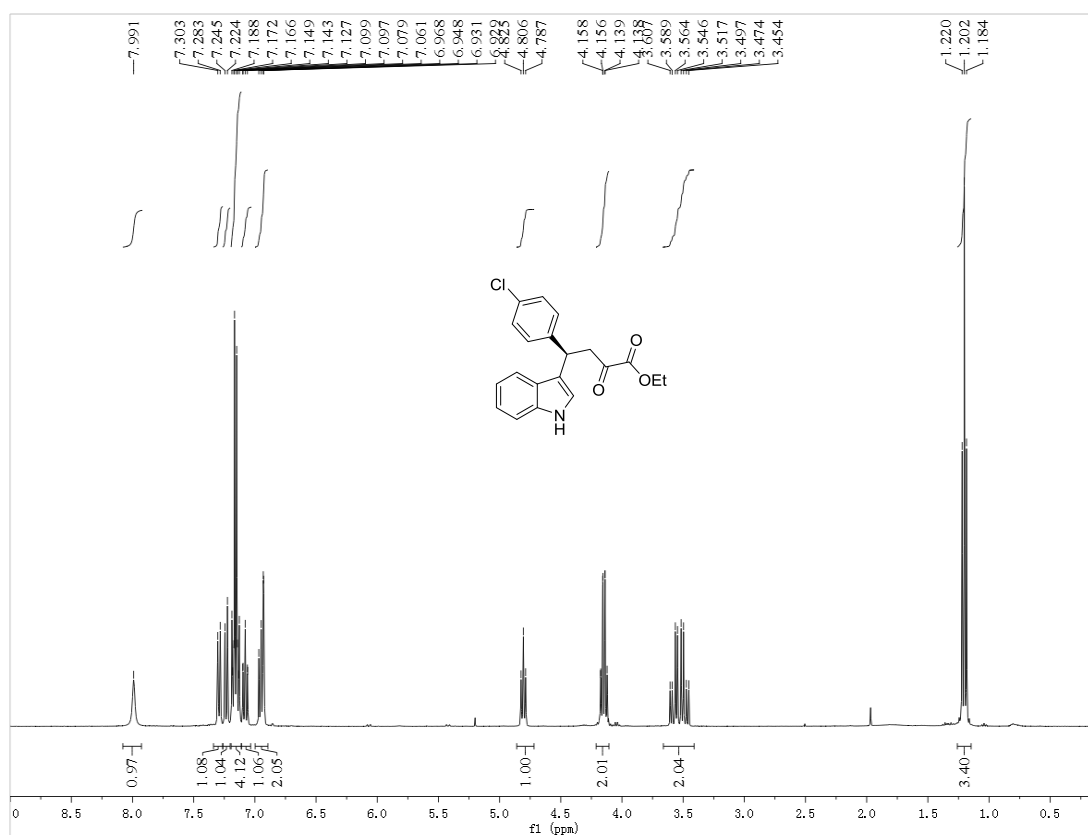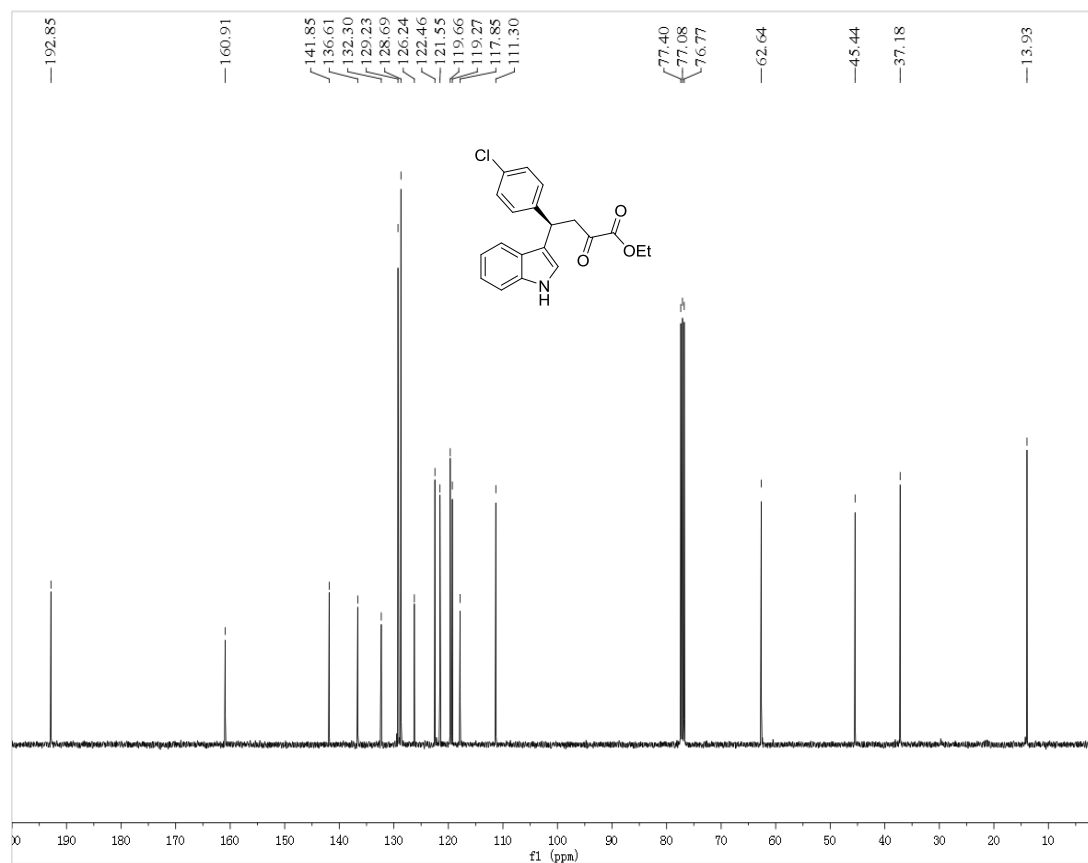

### HPLC of 8e

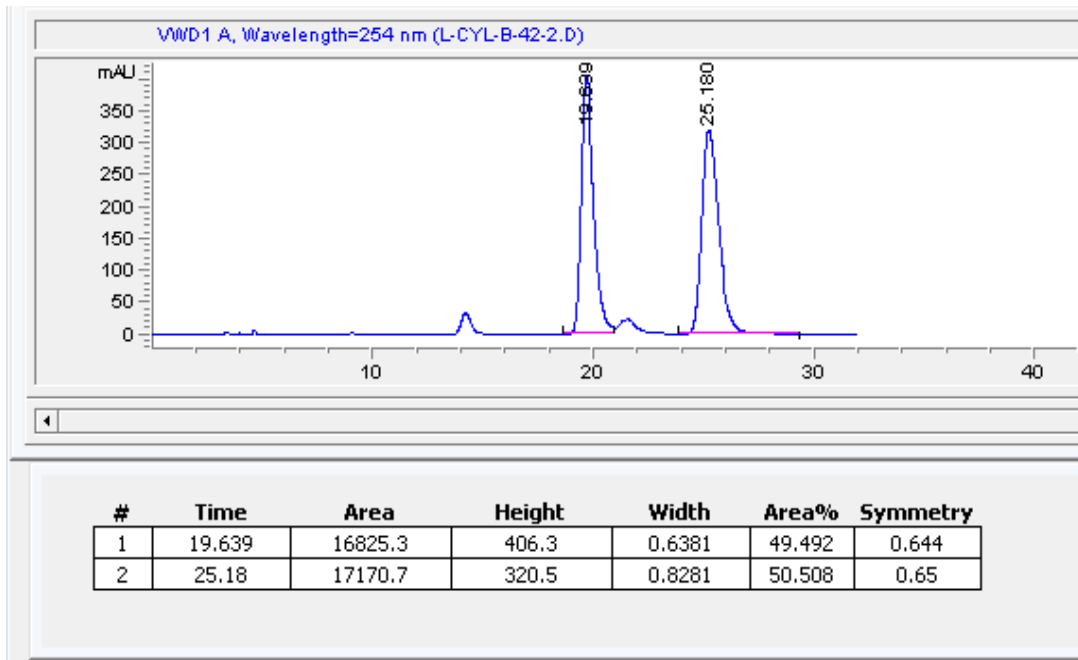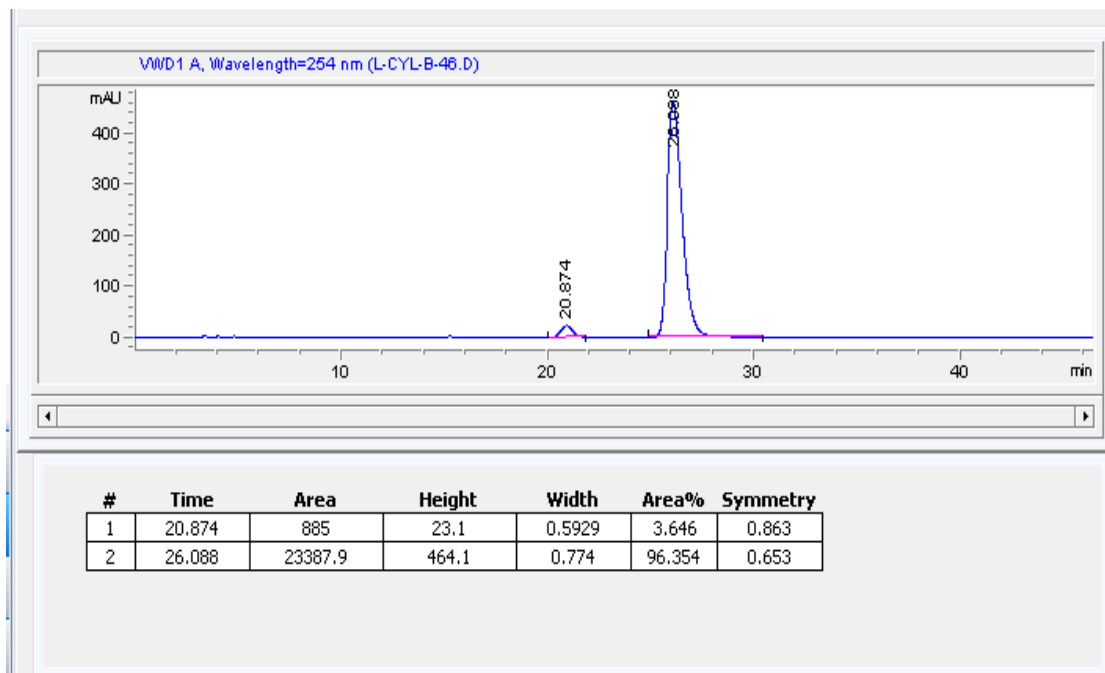

# <sup>1</sup>H and <sup>13</sup>C NMR of 8f

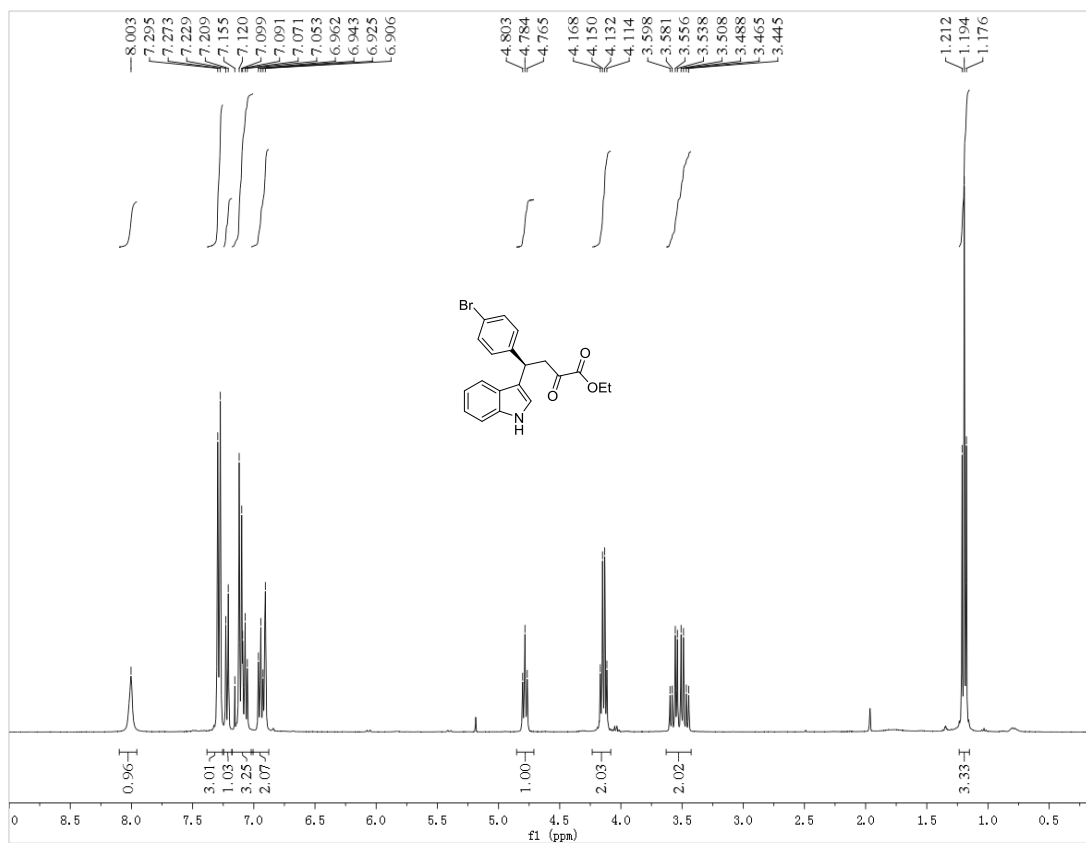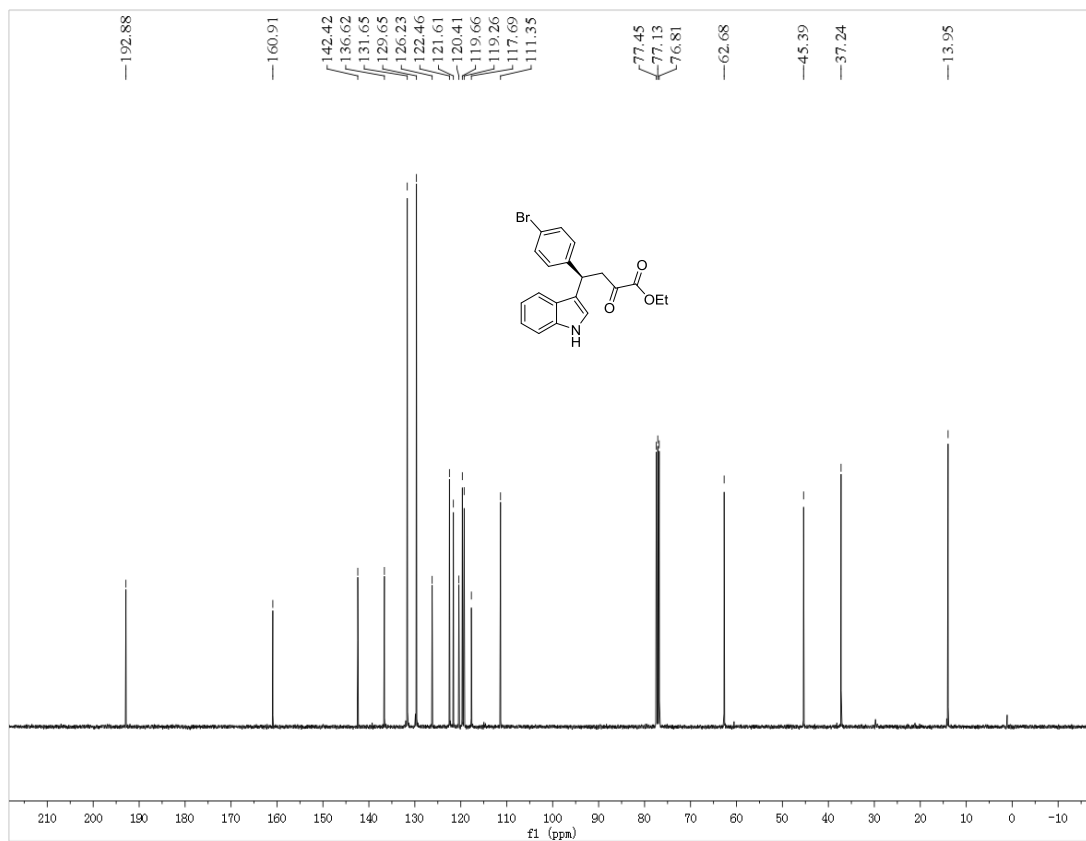

## HPLC of 8f

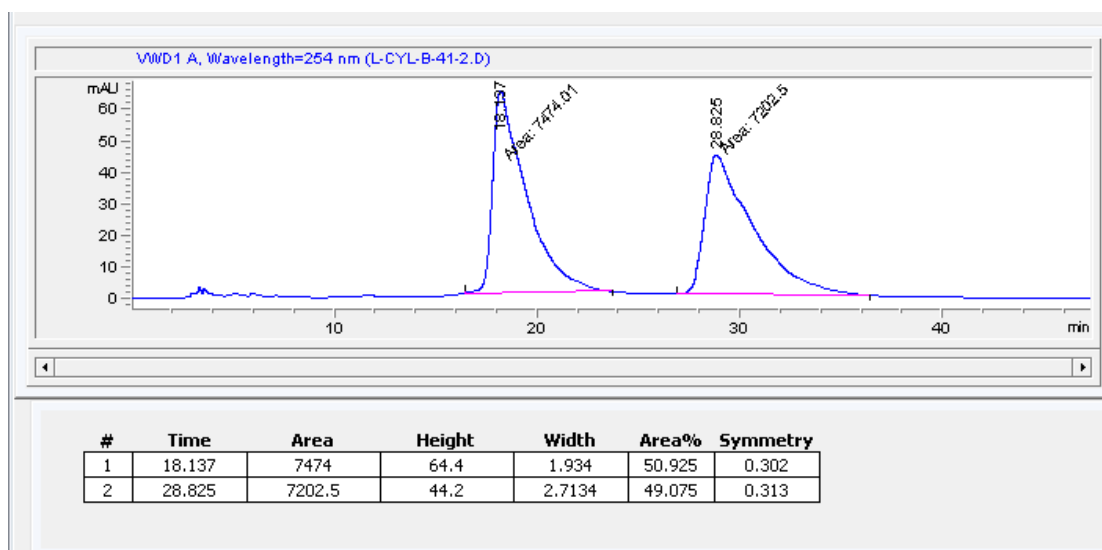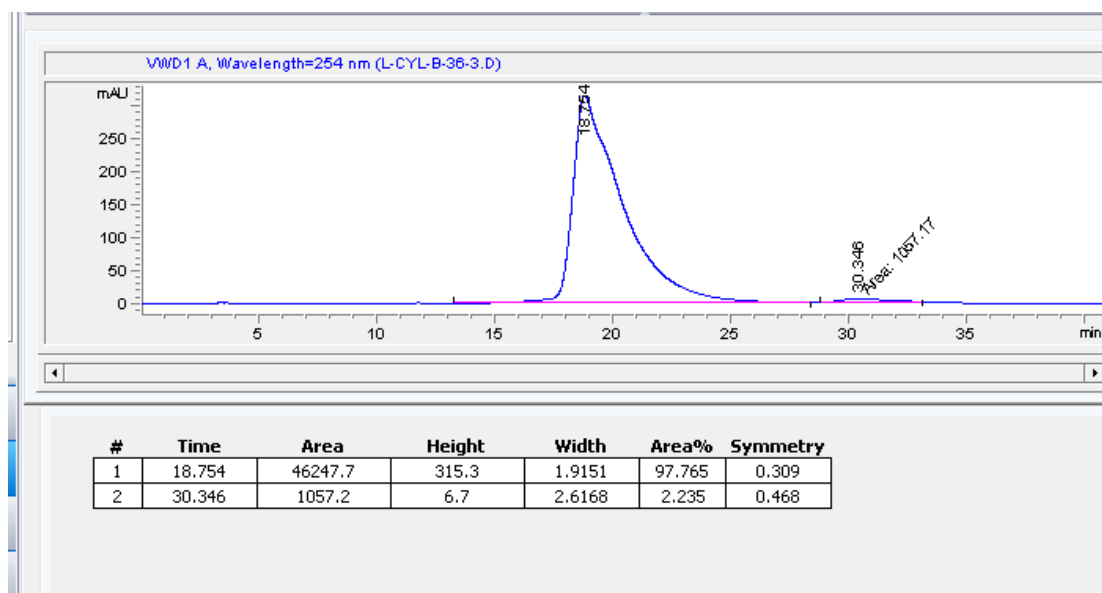



<sup>1</sup>H and <sup>13</sup>C NMR of 8g

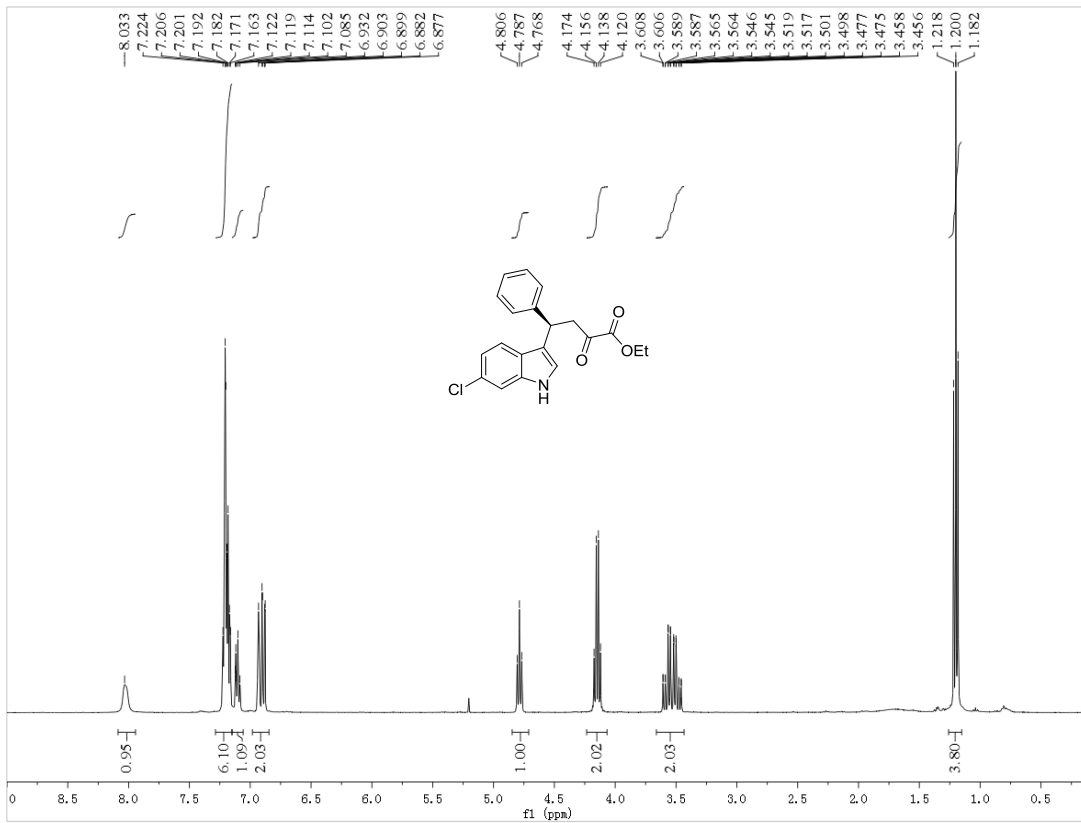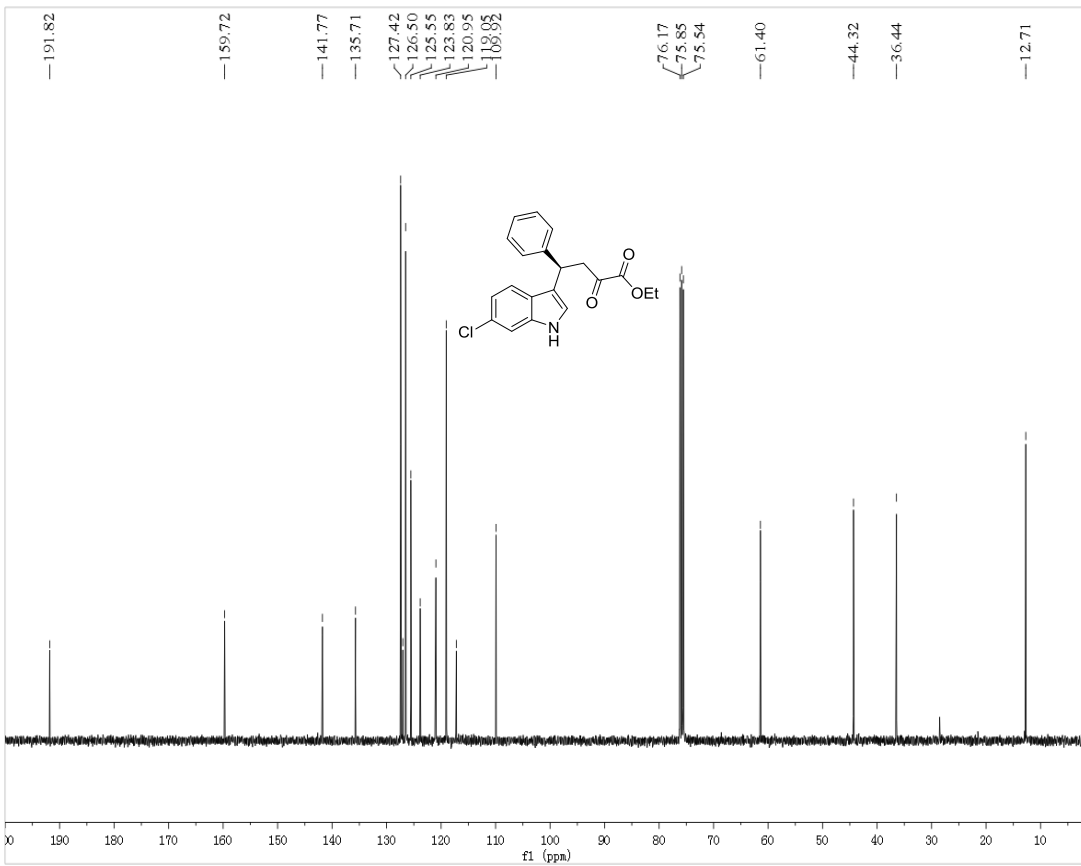

## HPLC of 8g

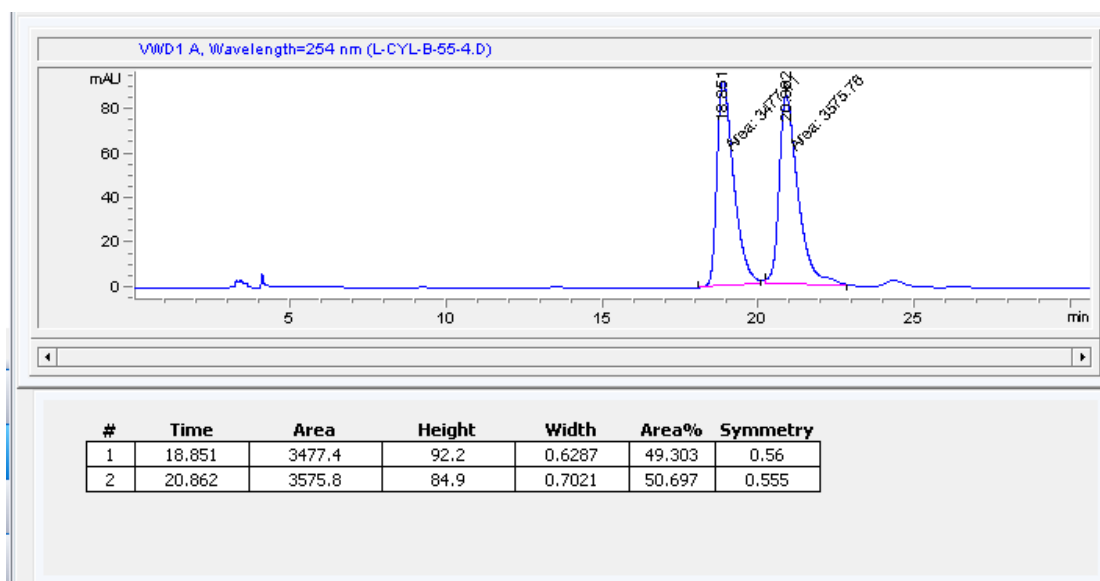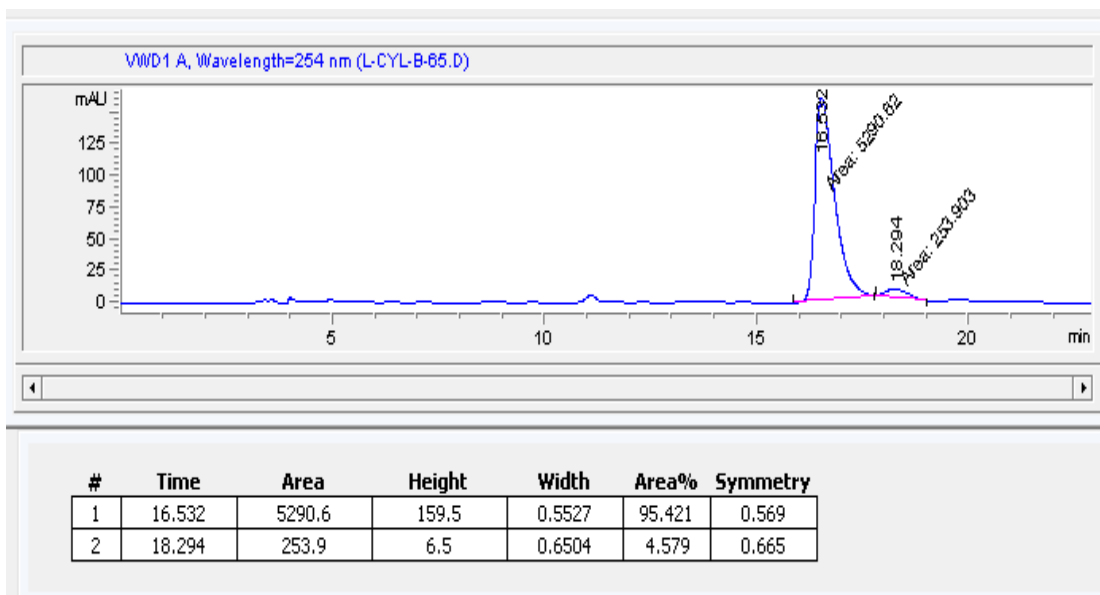

# <sup>1</sup>H and <sup>13</sup>C NMR of 8h

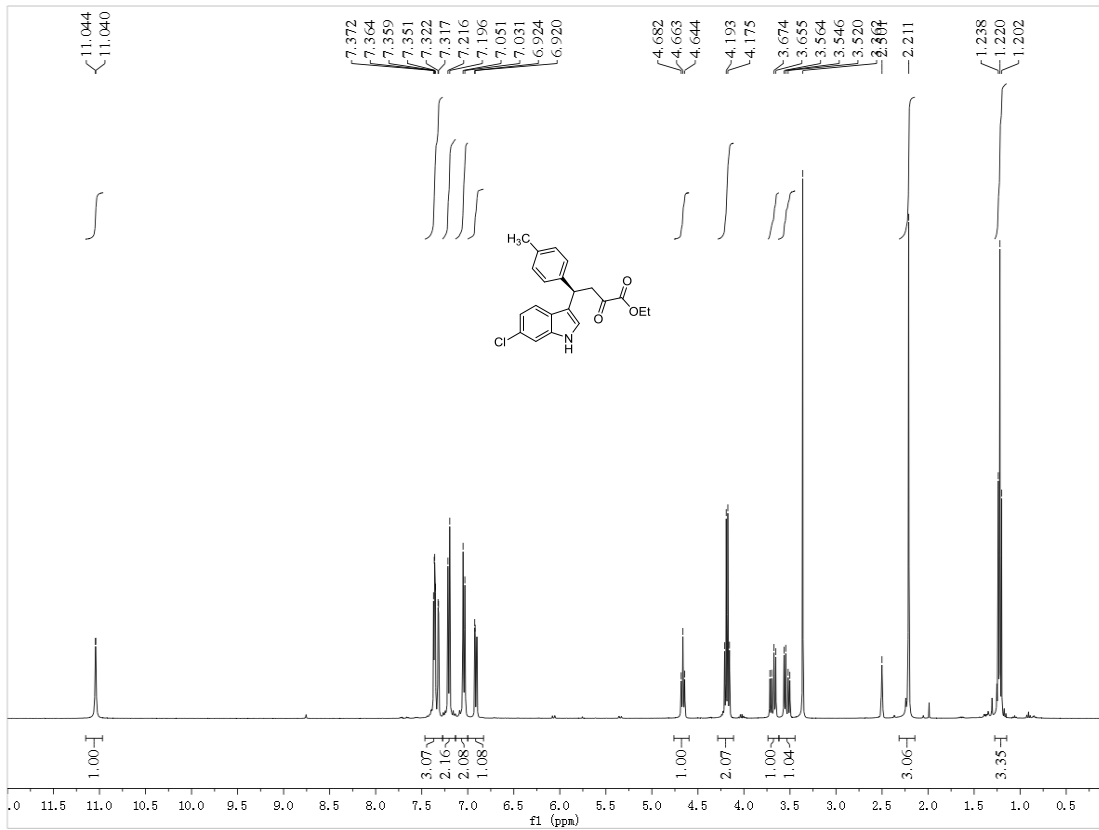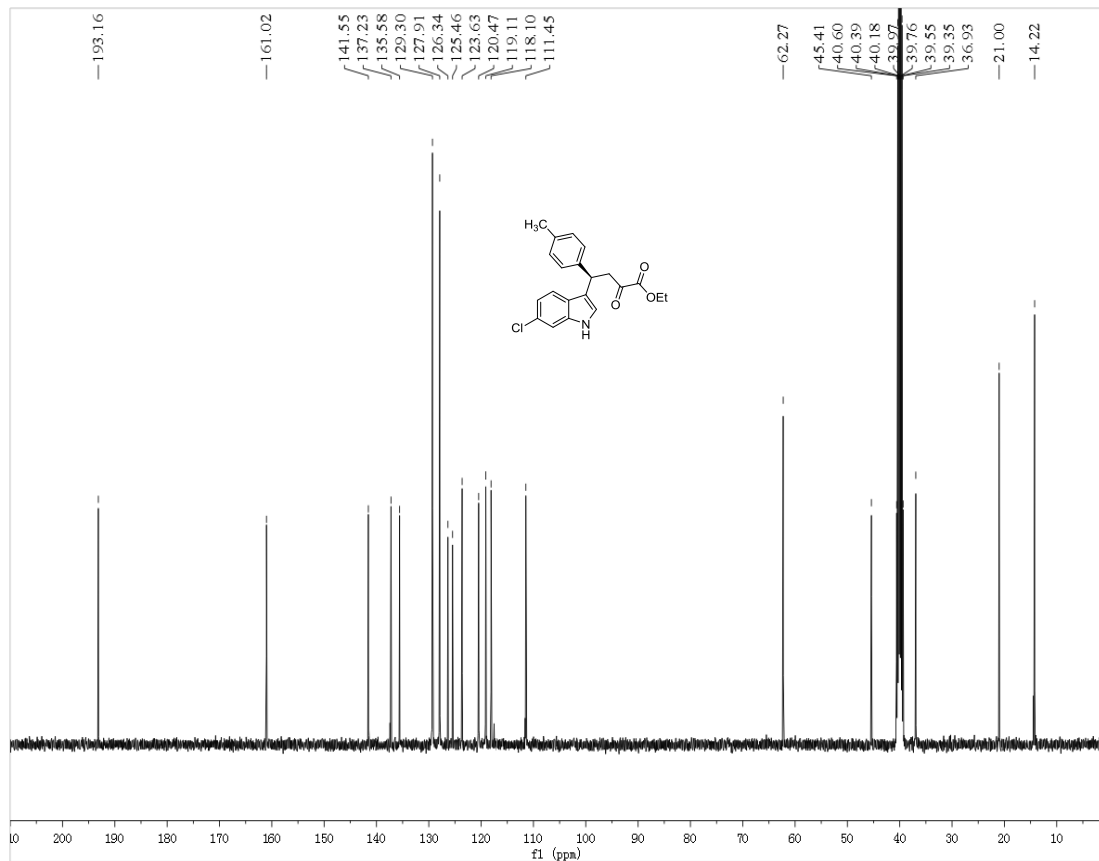

## HPLC of 8h

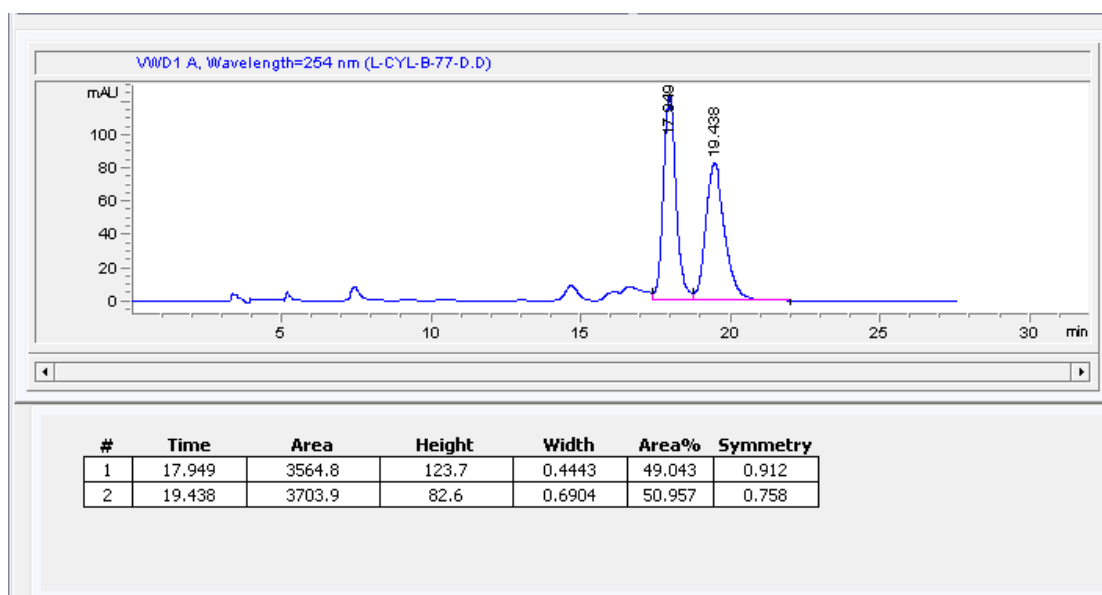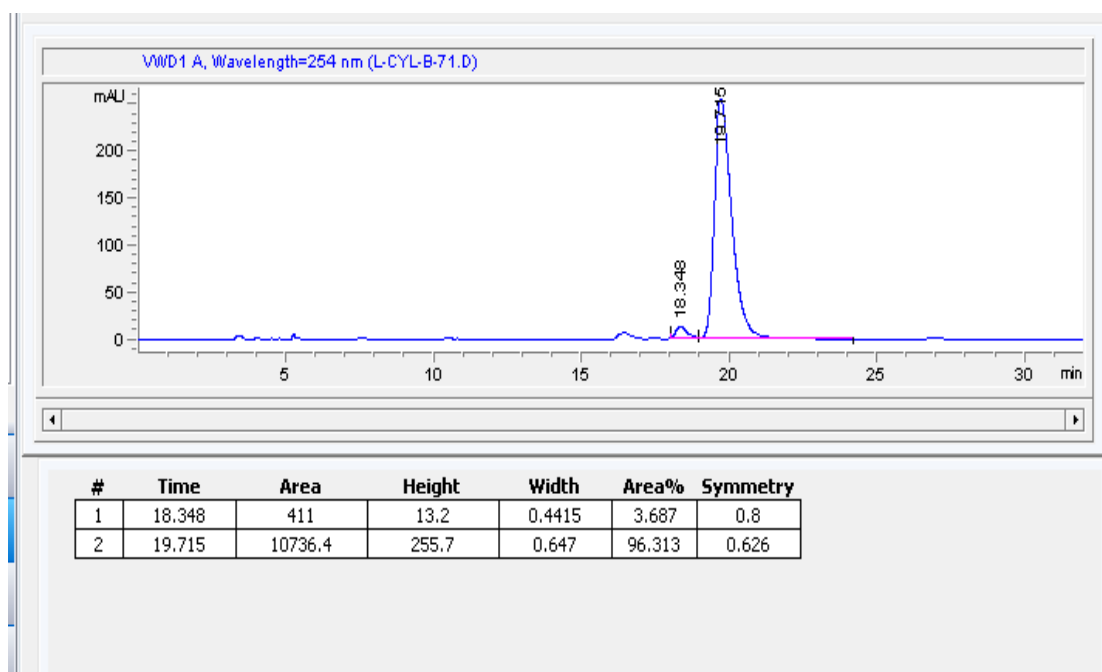

# <sup>1</sup>H and <sup>13</sup>C NMR of 8i

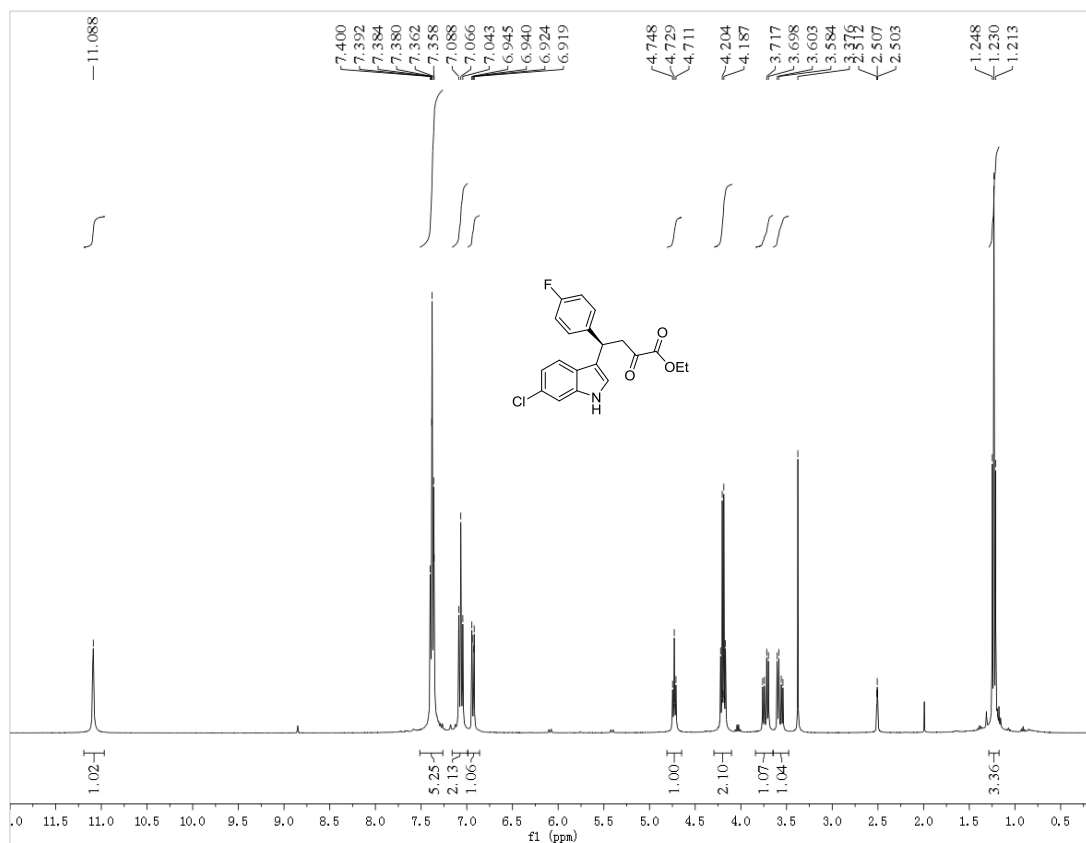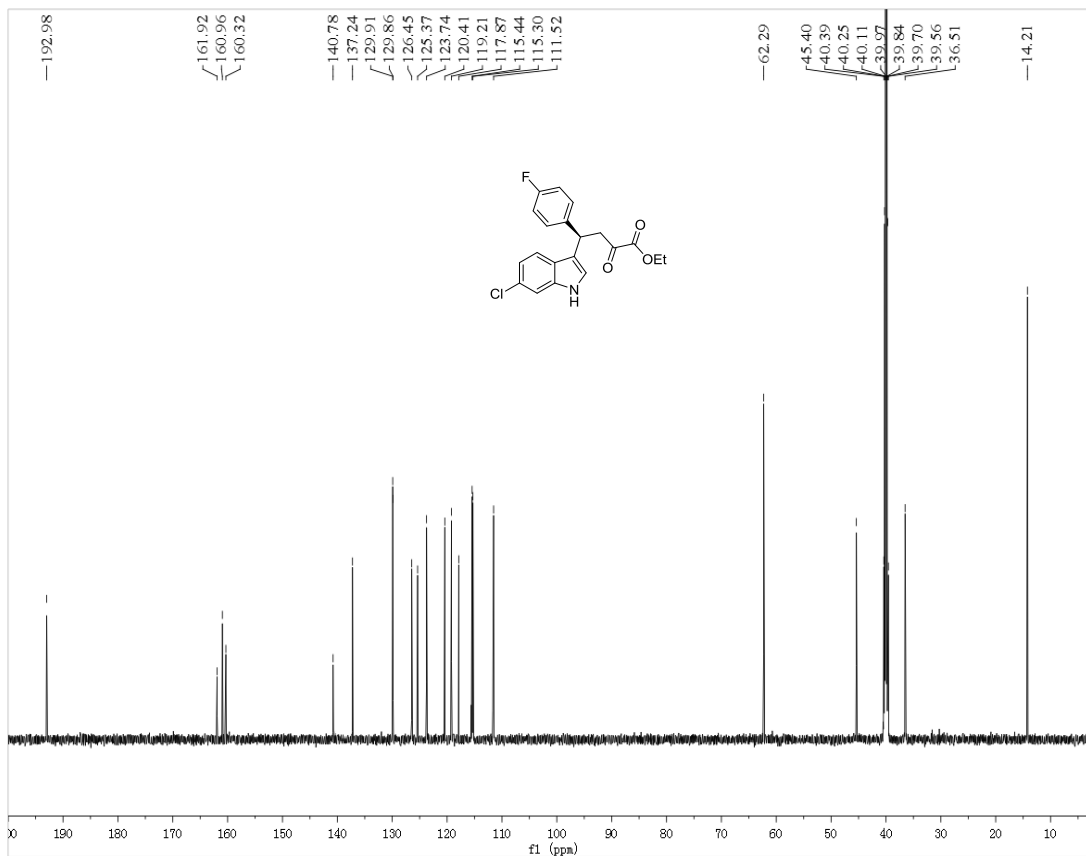

## HPLC of 8i

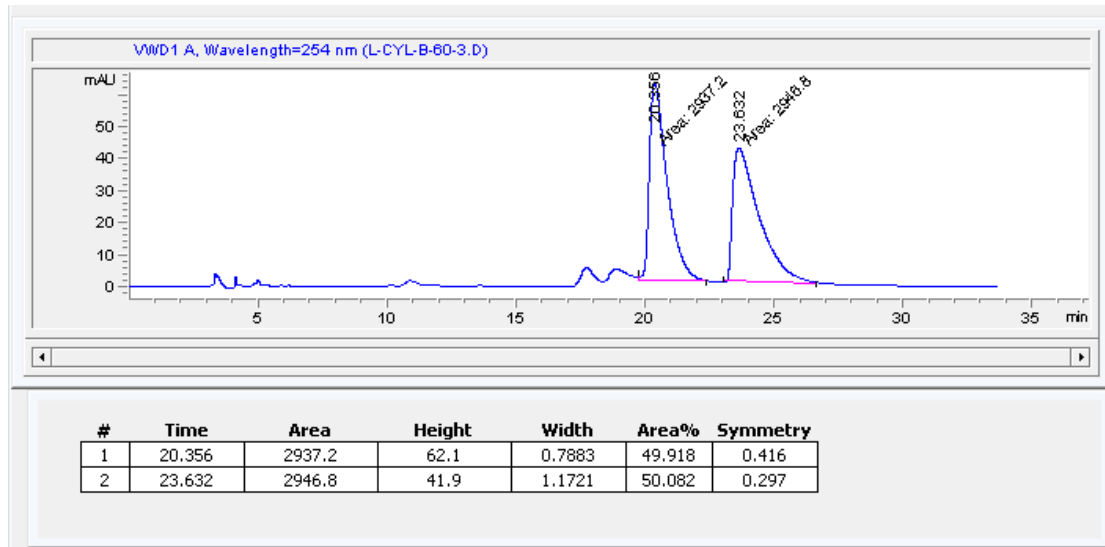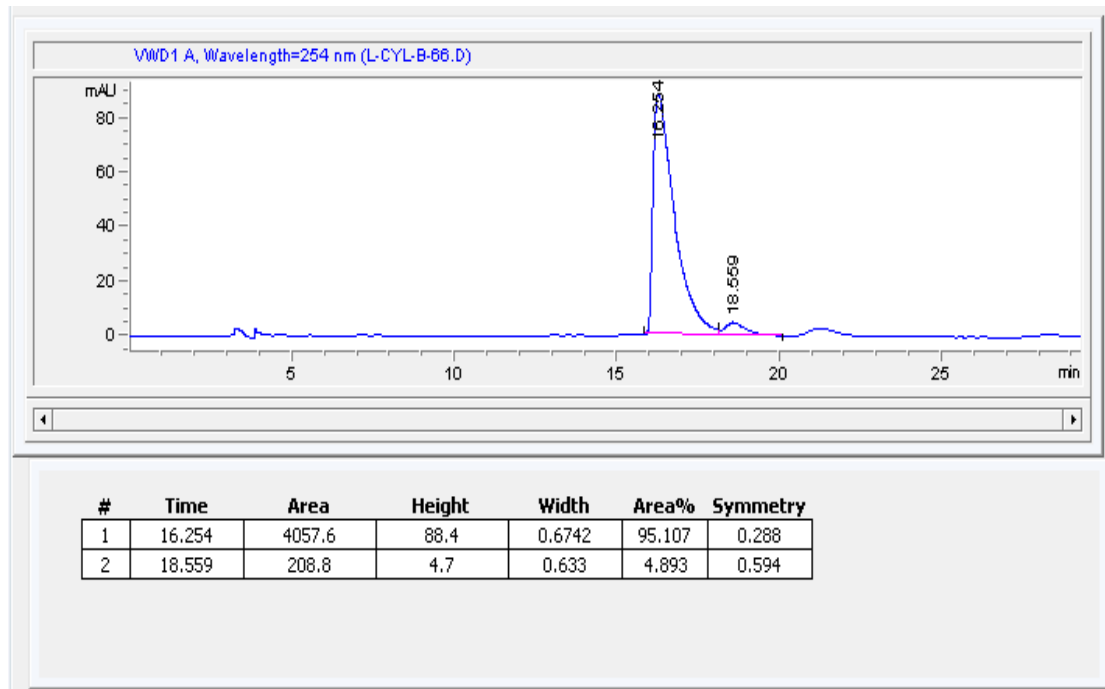

# <sup>1</sup>H and <sup>13</sup>C NMR of 8j

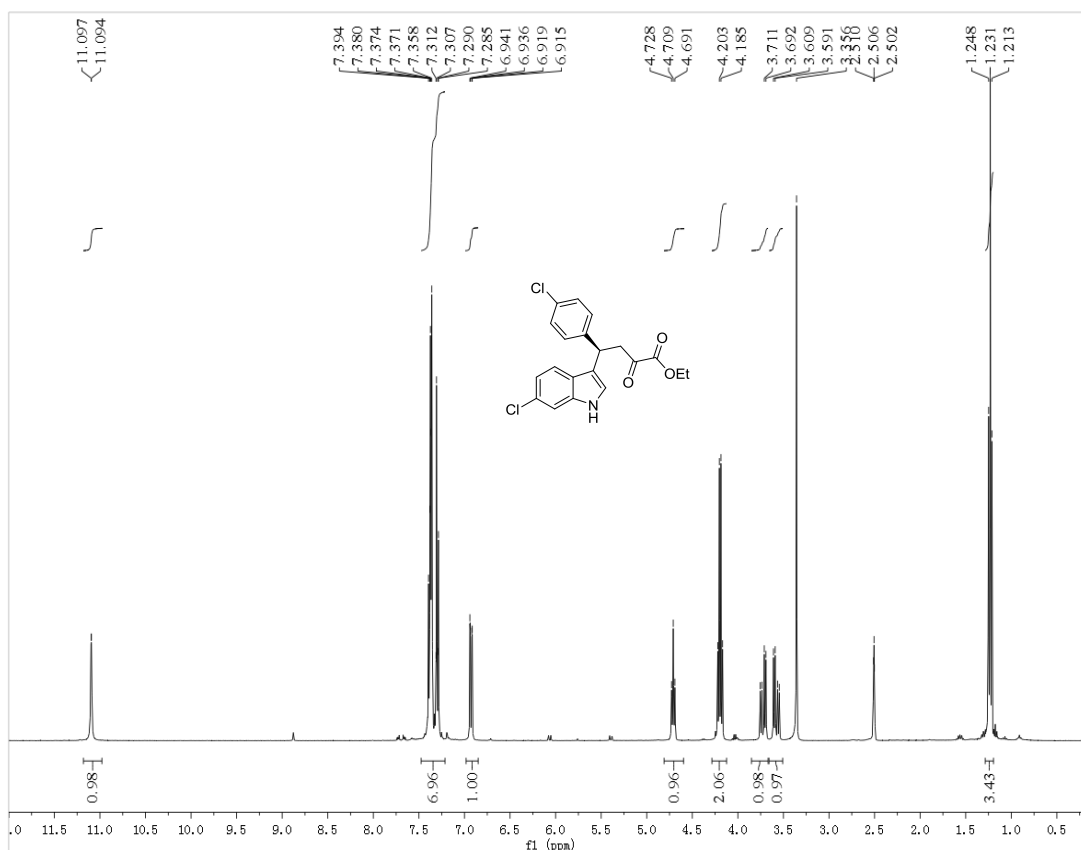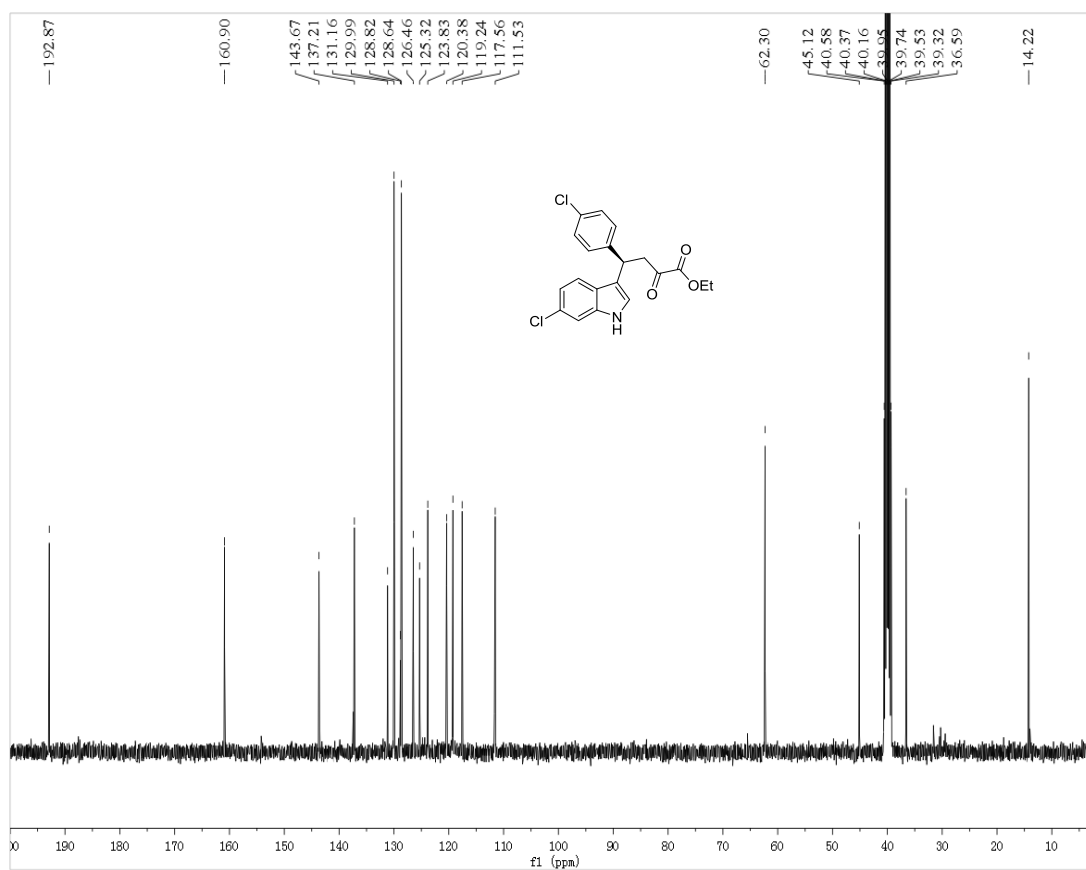

## HPLC of 8j

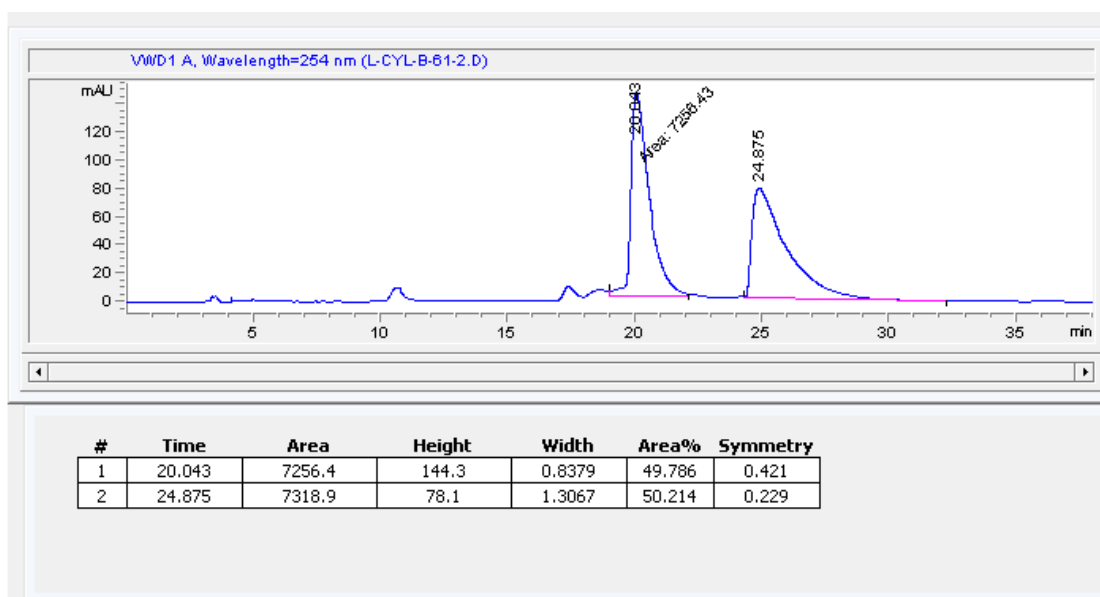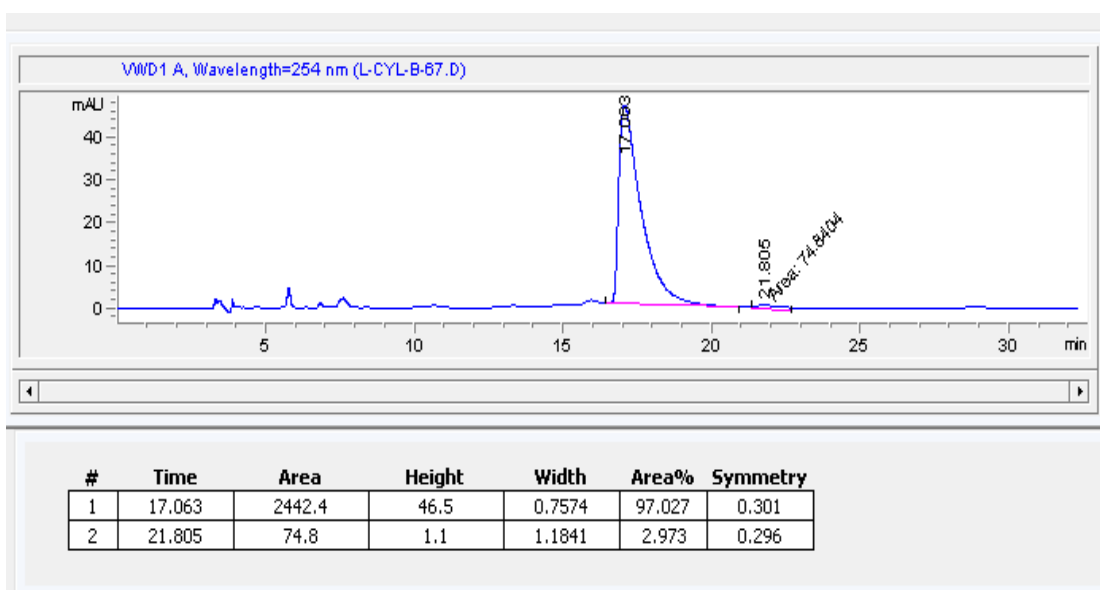



# $^1\text{H}$ and $^{13}\text{C}$ NMR of 8k

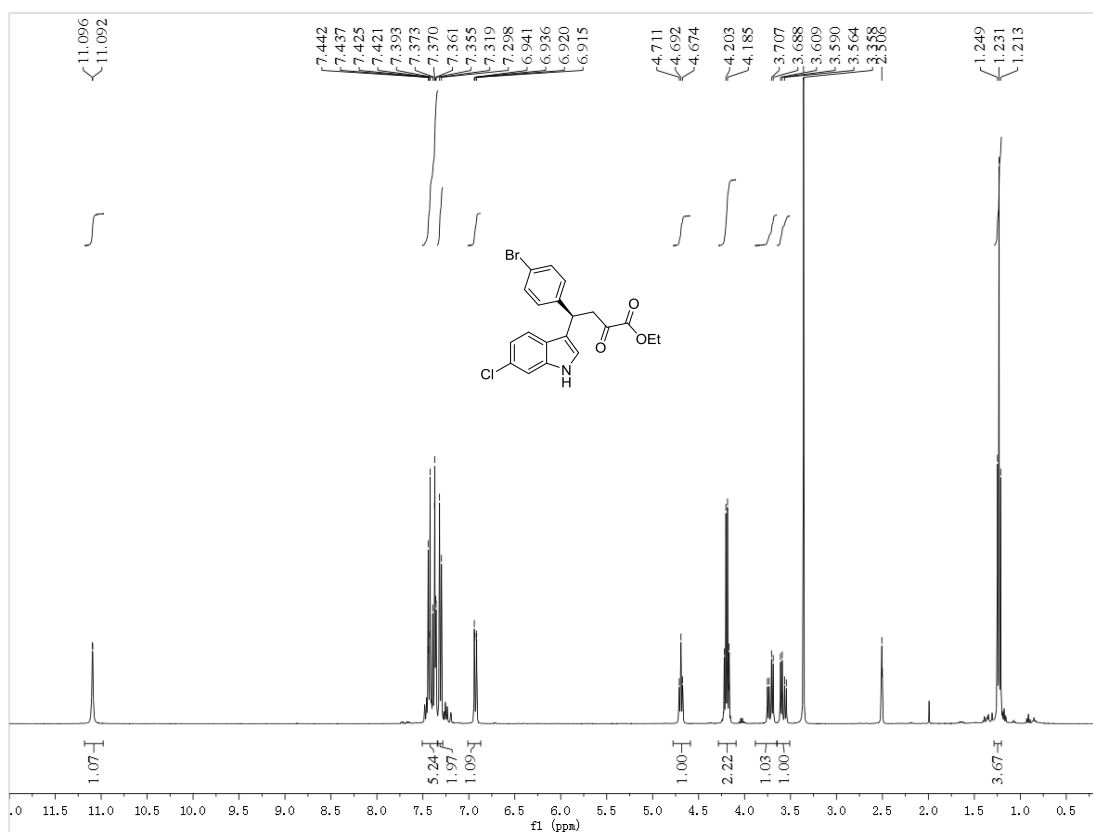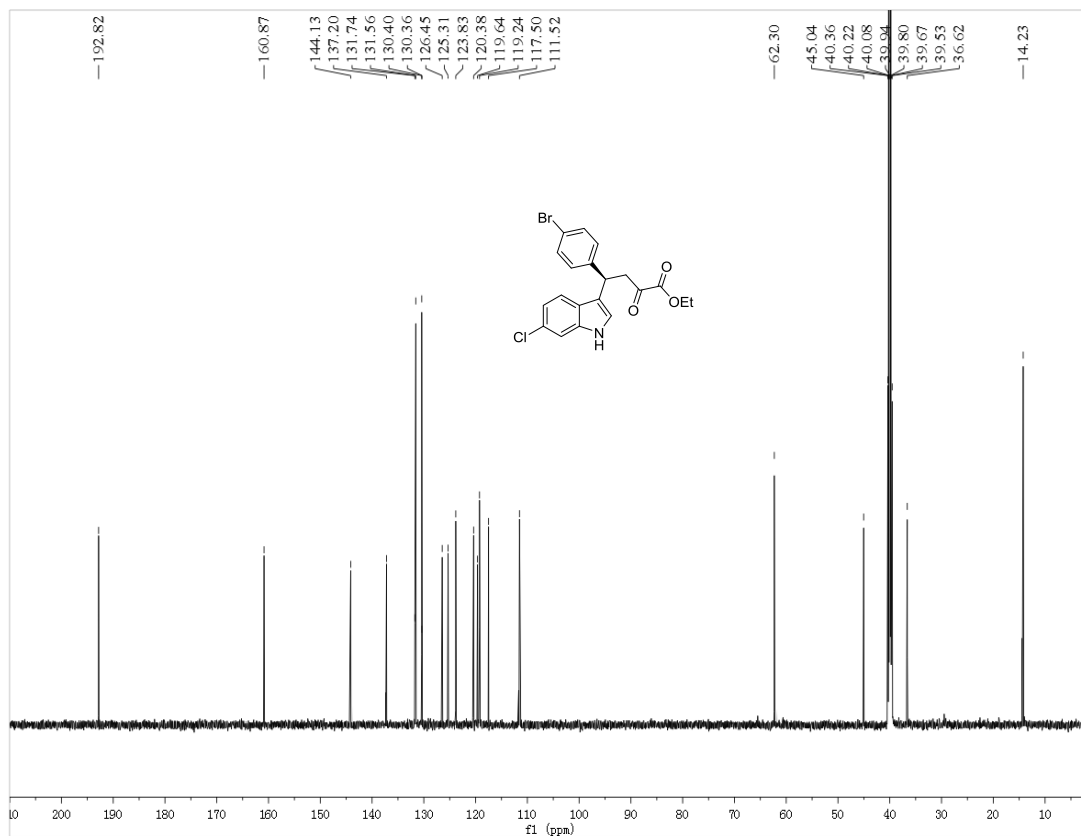

## HPLC of 8k

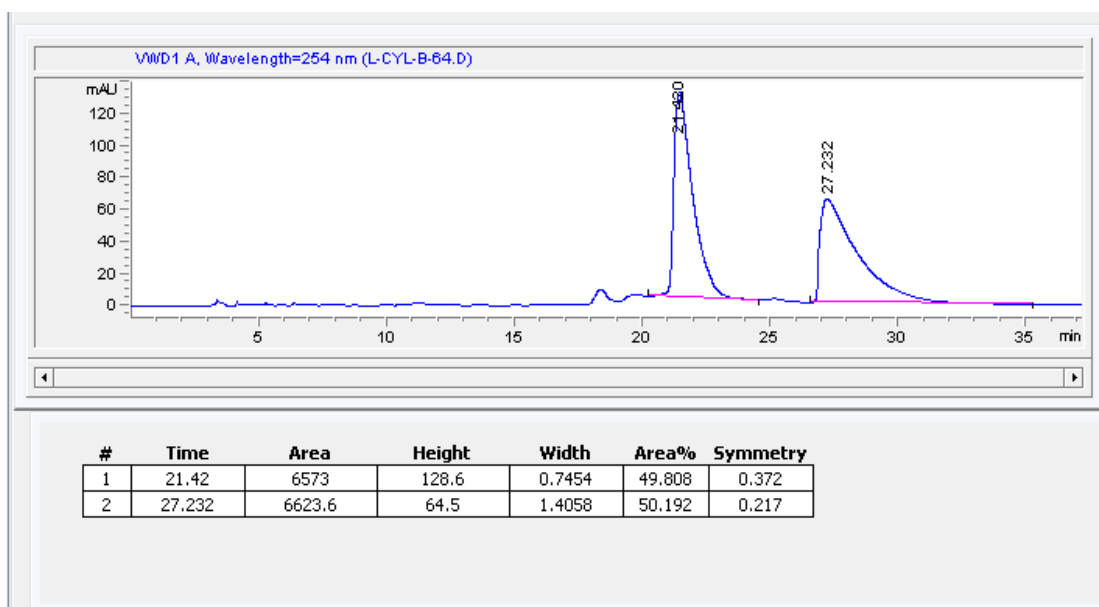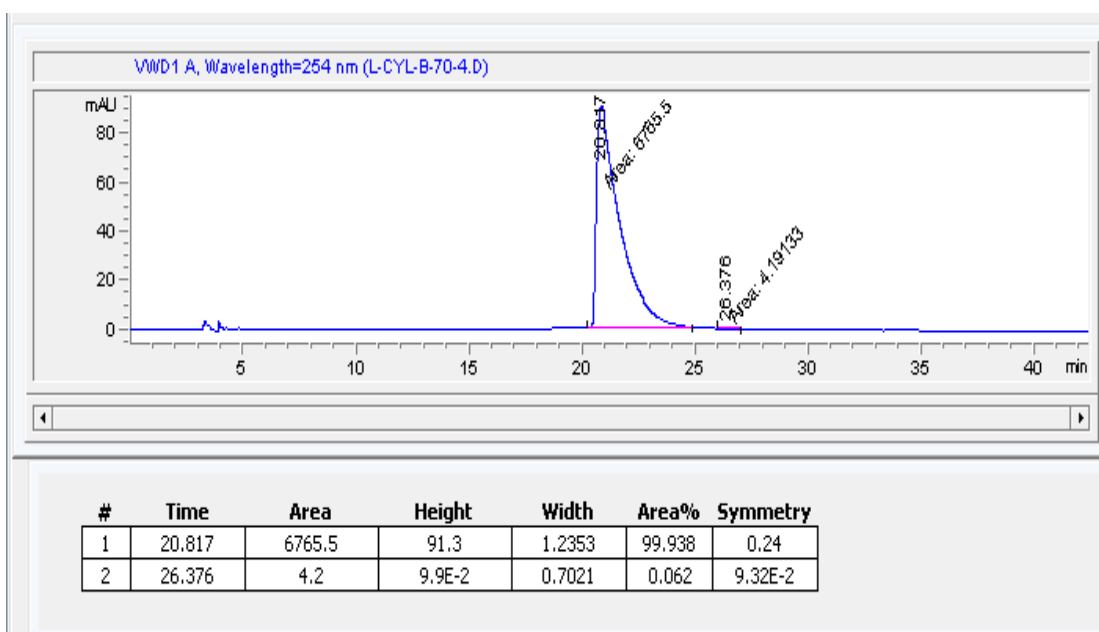

# $^1\text{H}$ and $^{13}\text{C}$ NMR of 81

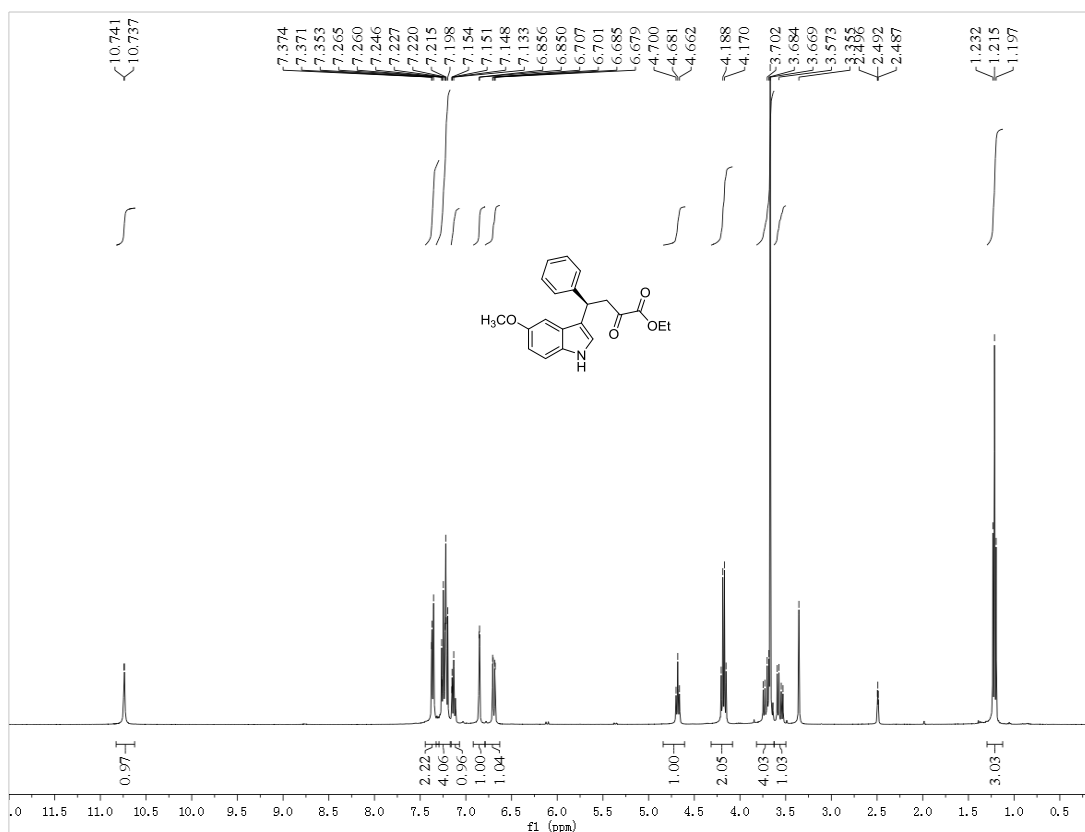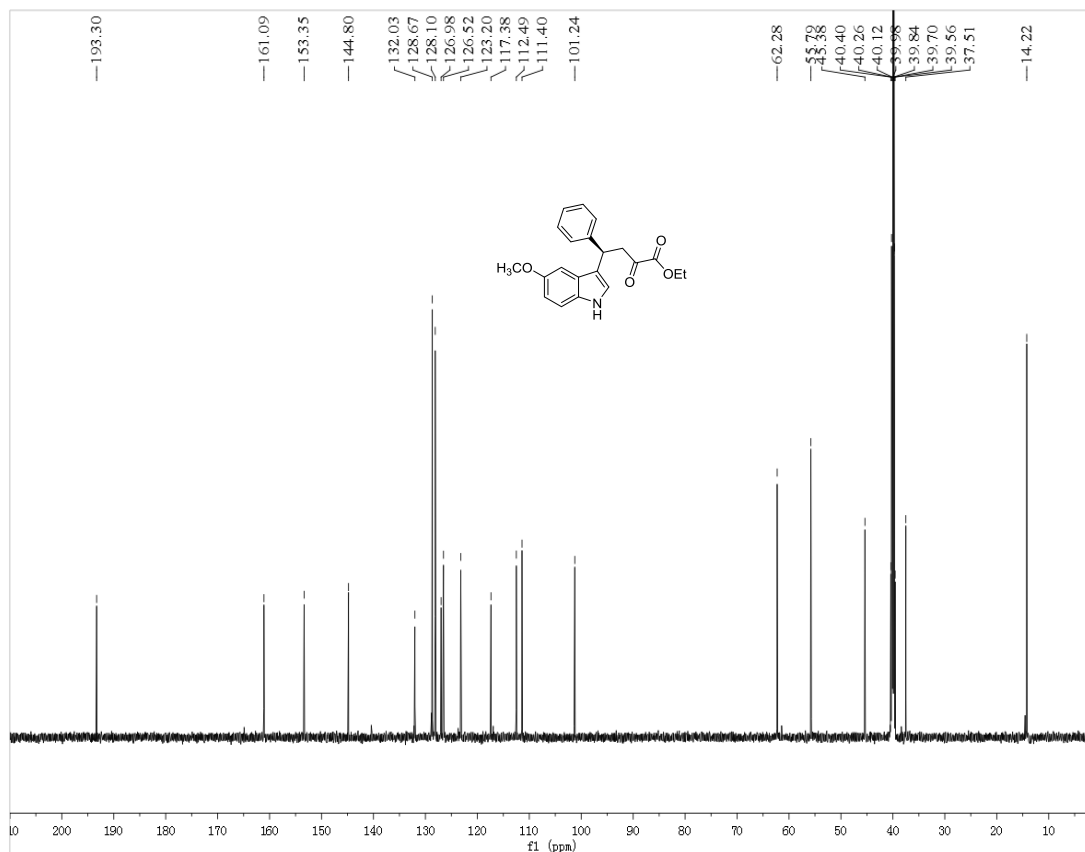

# HPLC of 81

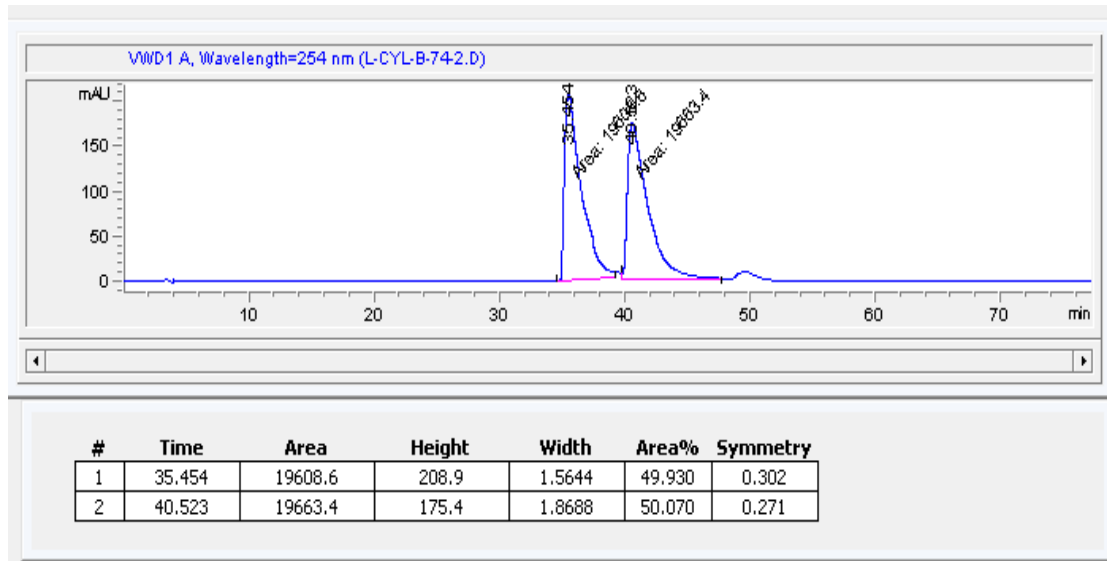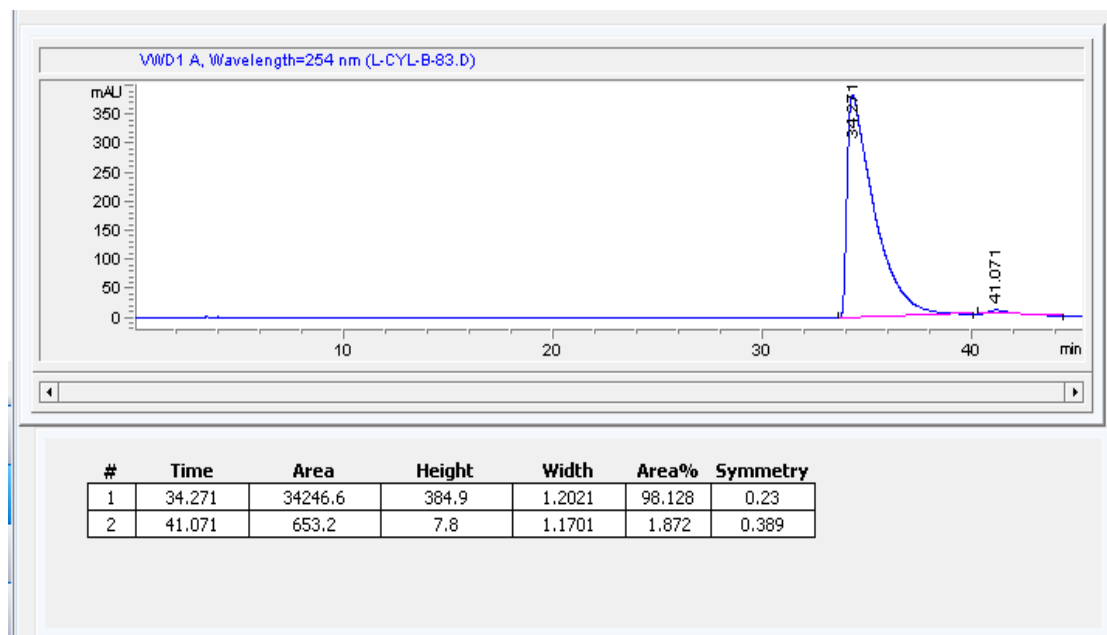

# <sup>1</sup>H and <sup>13</sup>C NMR of 8m

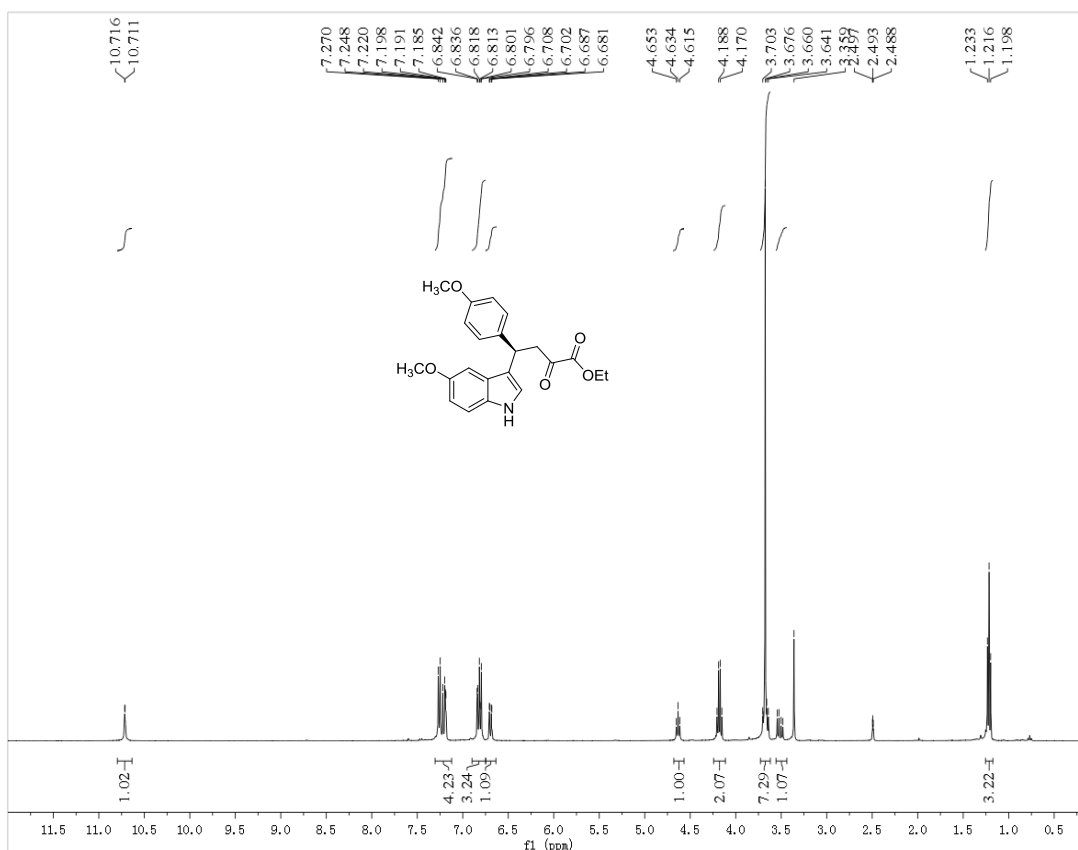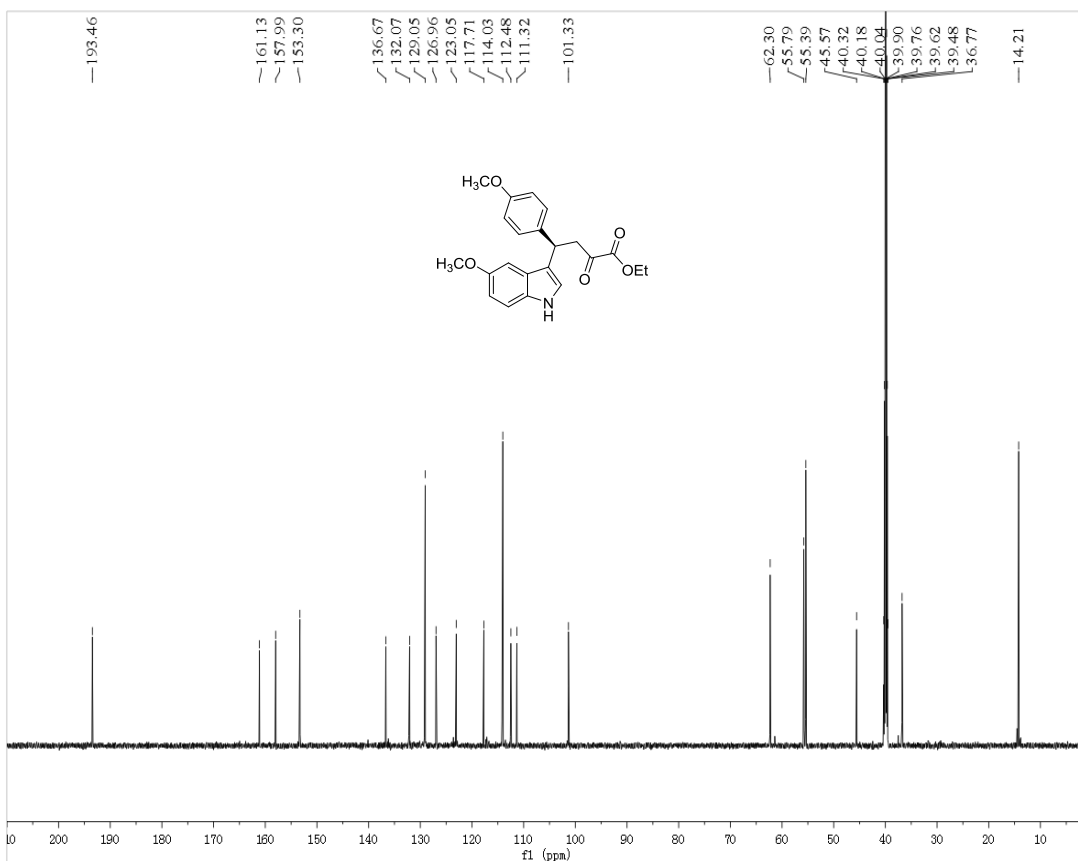

## HPLC of 8m

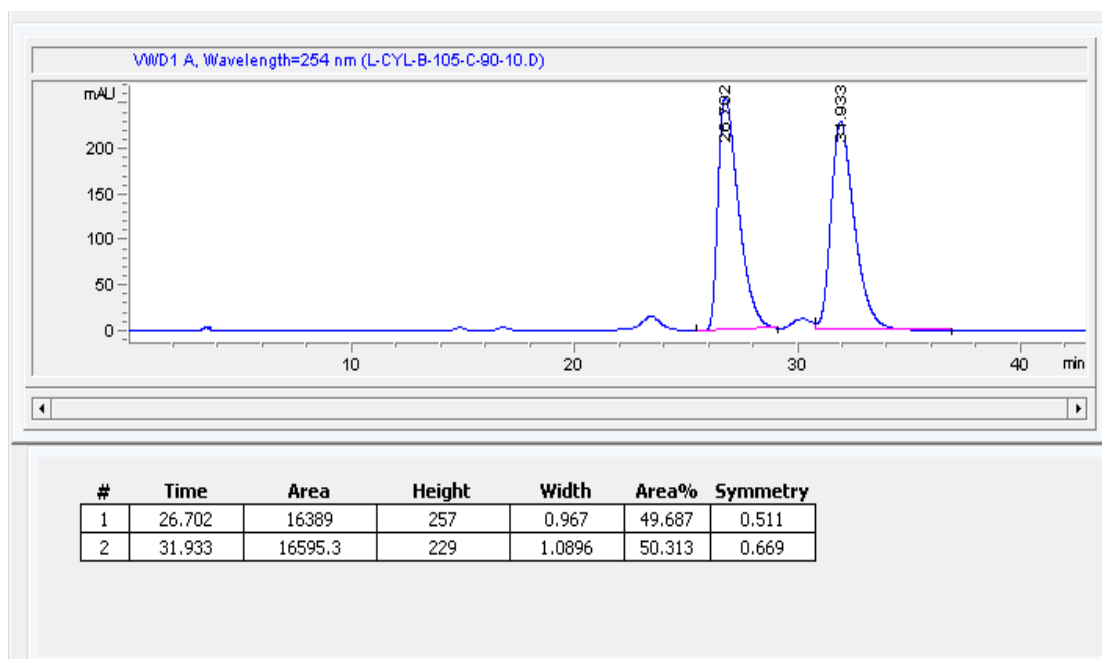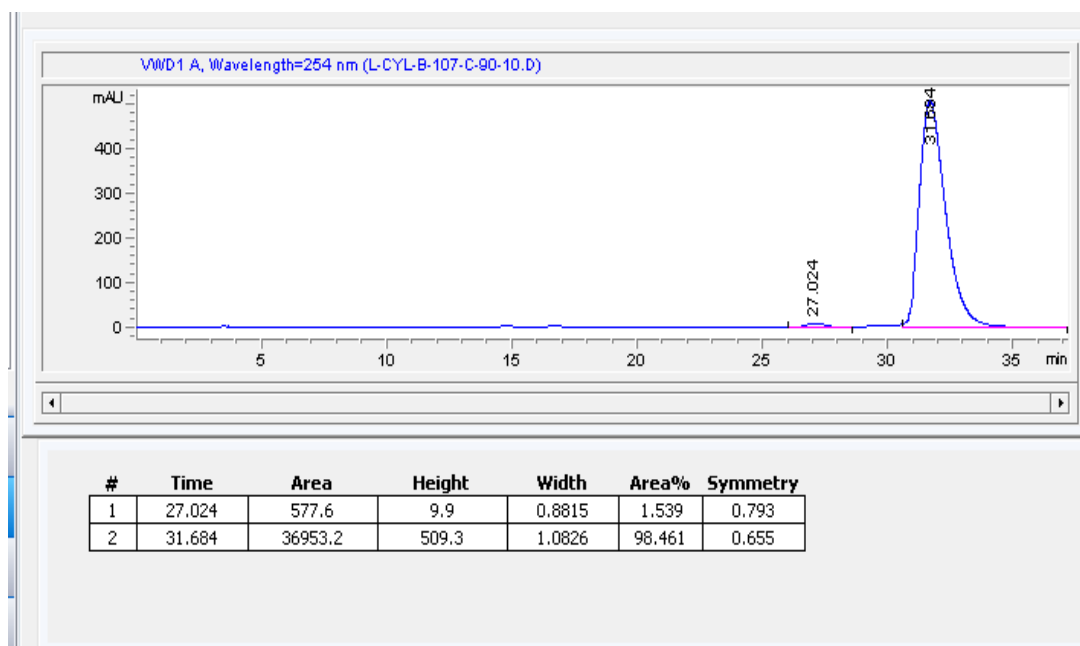

# <sup>1</sup>H and <sup>13</sup>C NMR of 8n

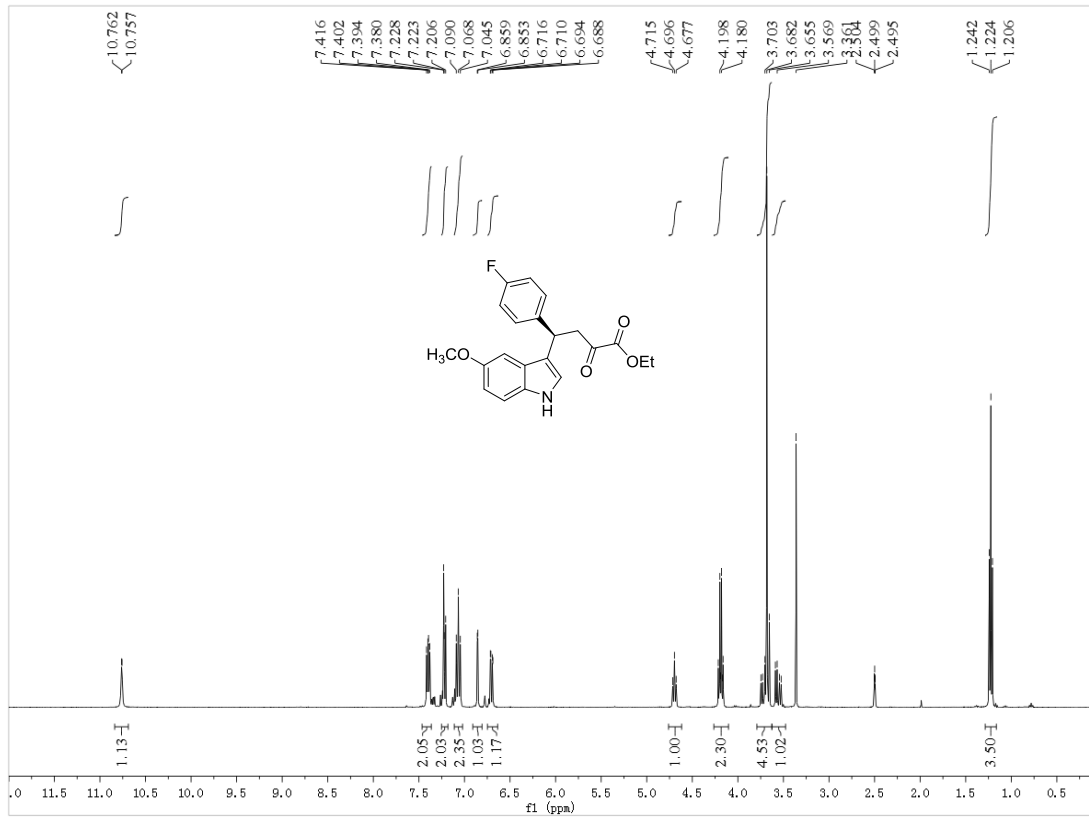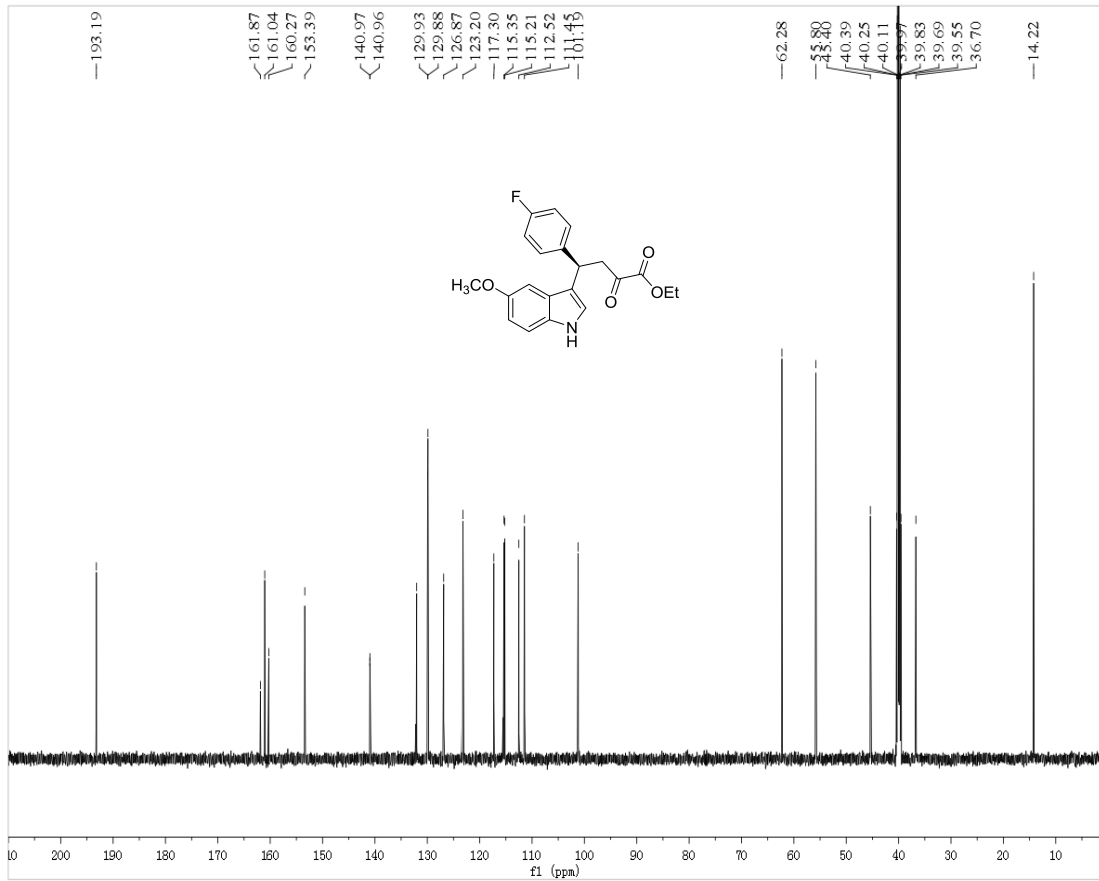

### HPLC of 8n

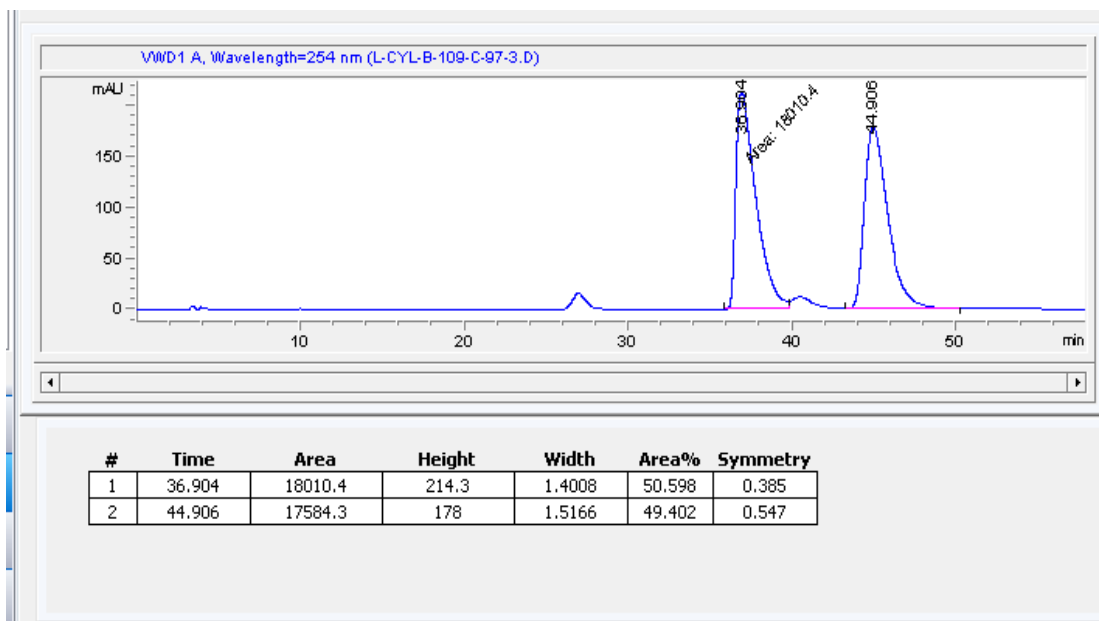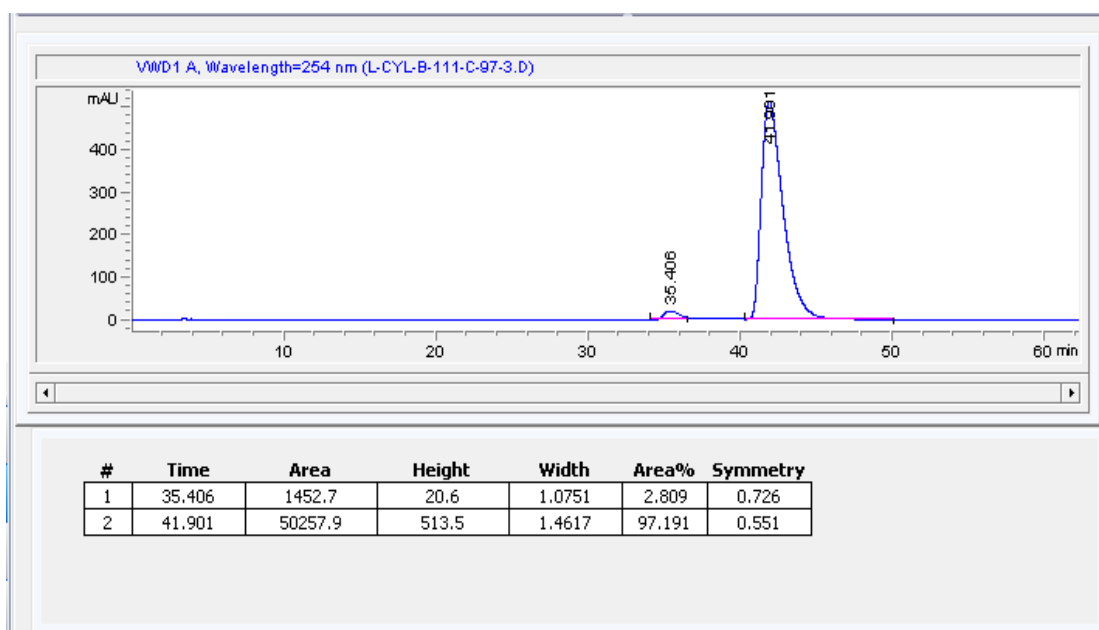



**$^1\text{H}$  and  $^{13}\text{C}$  NMR of 8o**

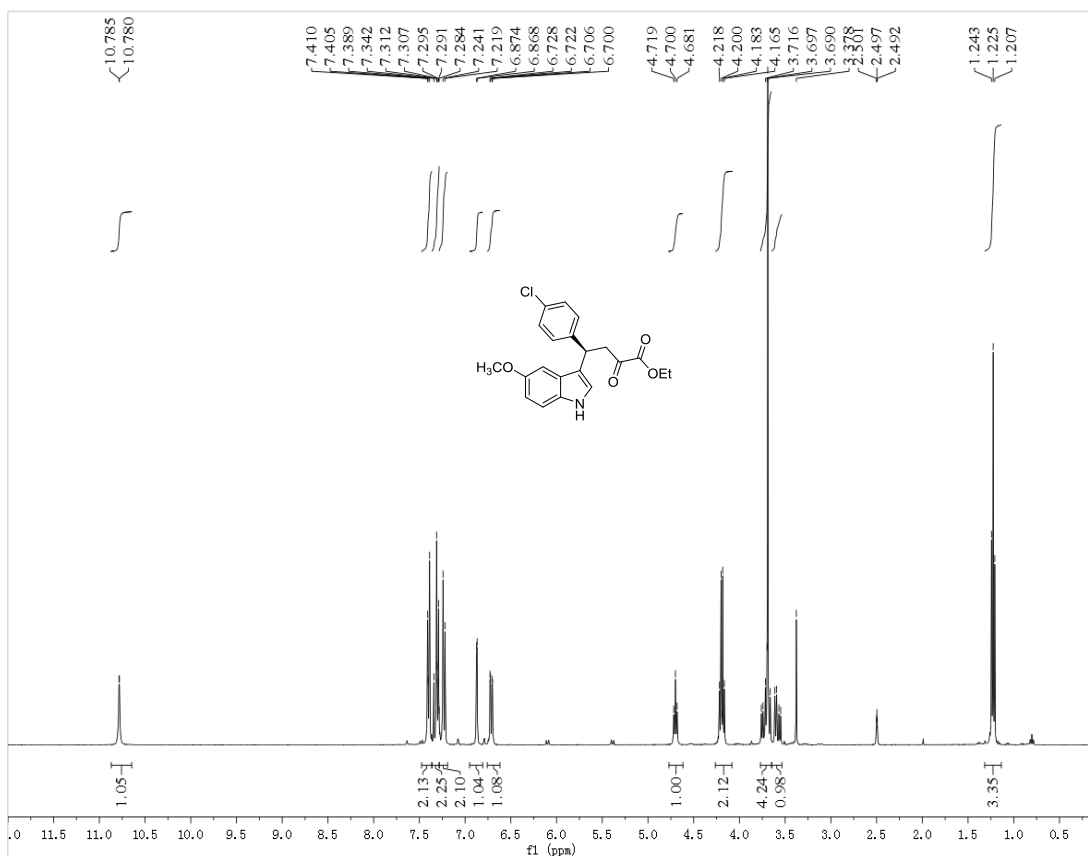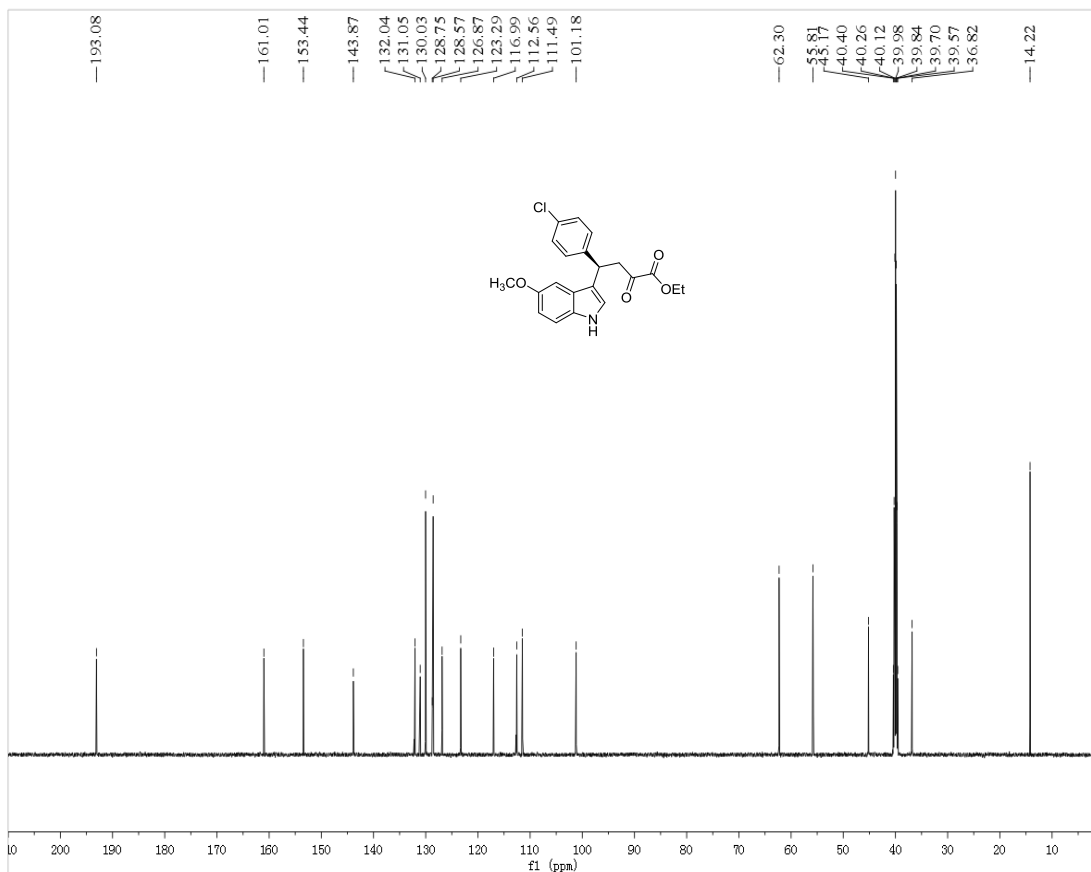

## HPLC of 8o

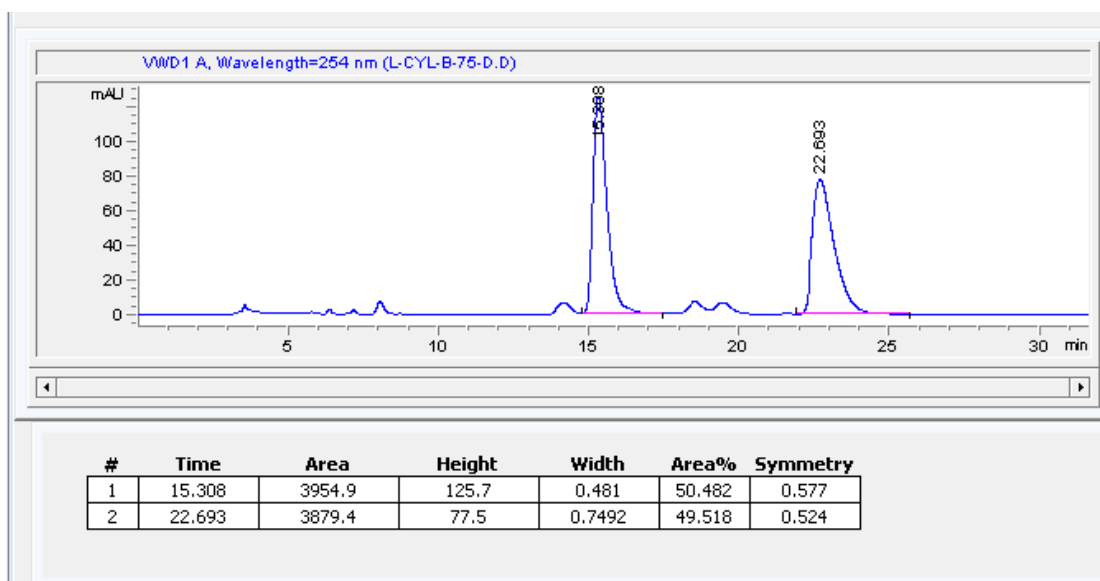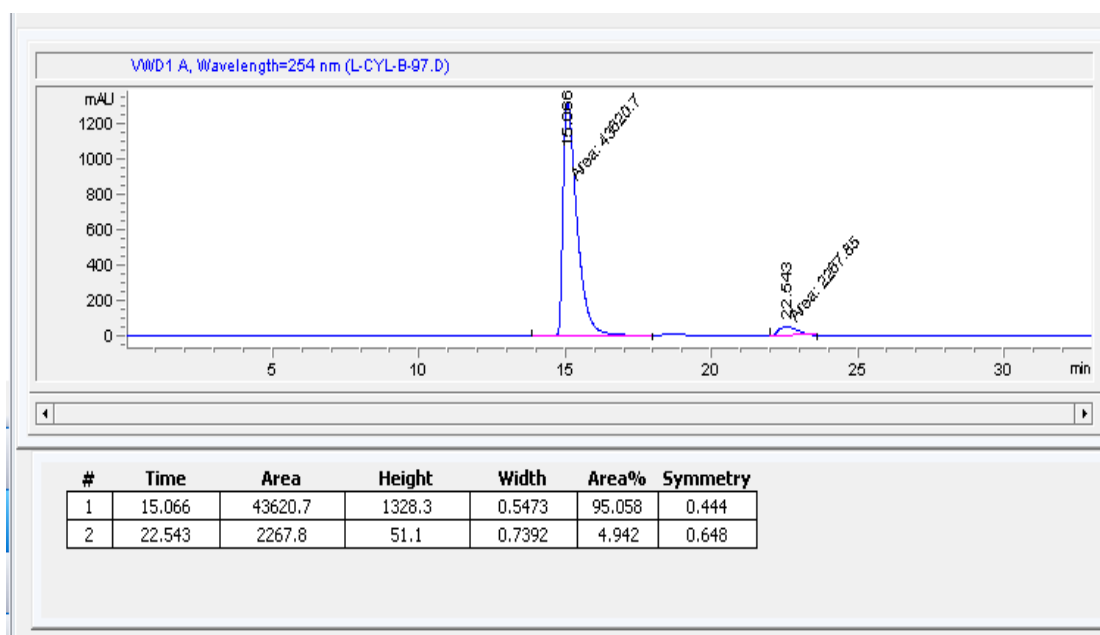

# <sup>1</sup>H and <sup>13</sup>C NMR of 8p

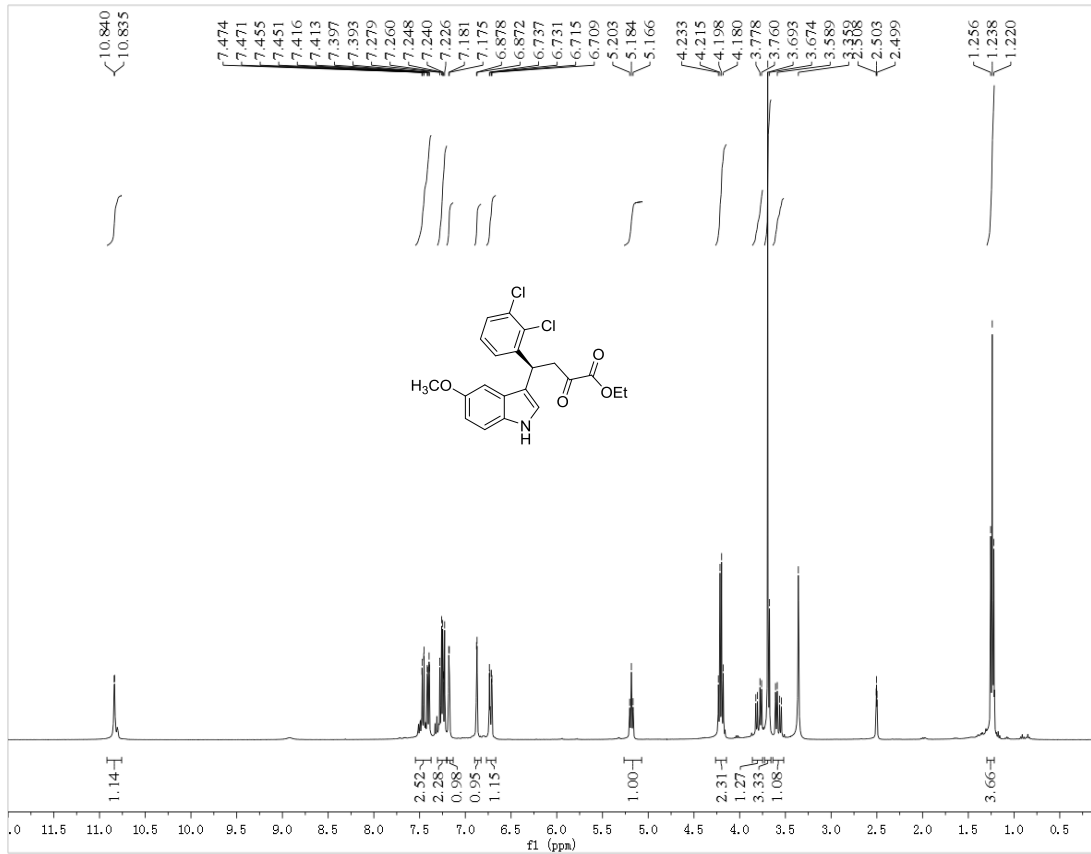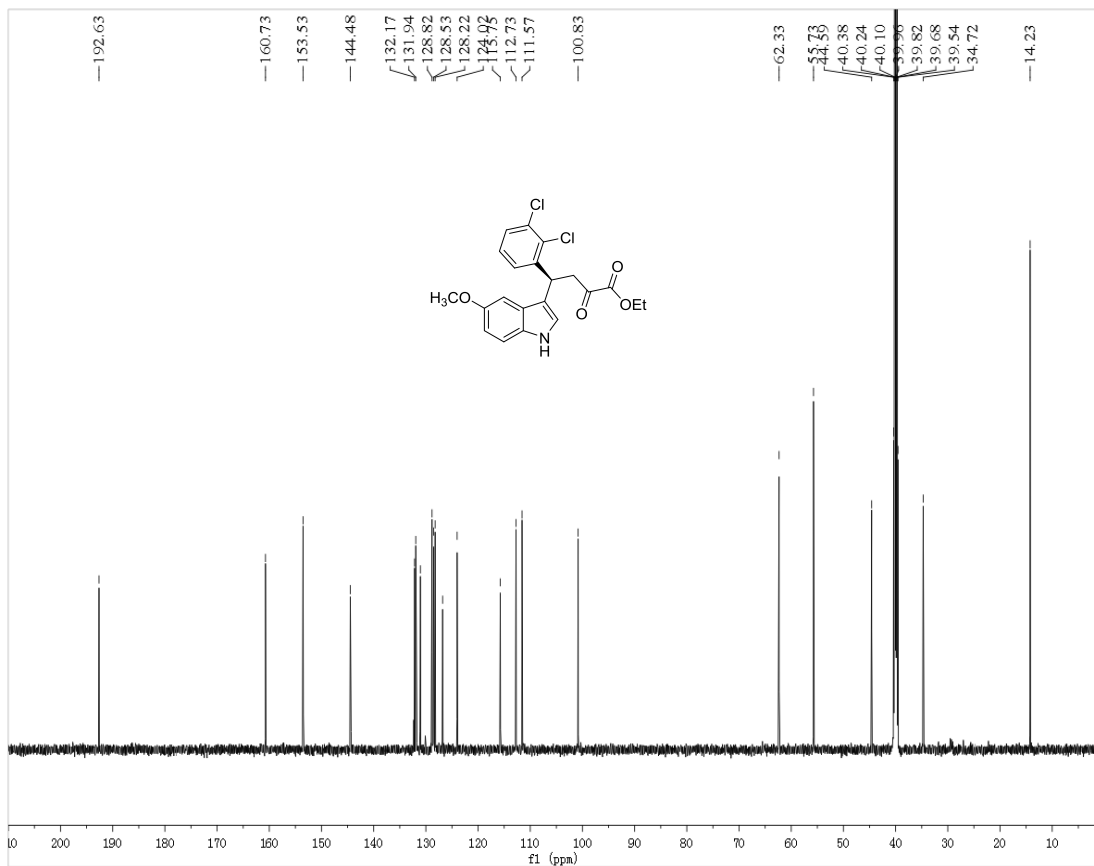

## HPLC of 8p

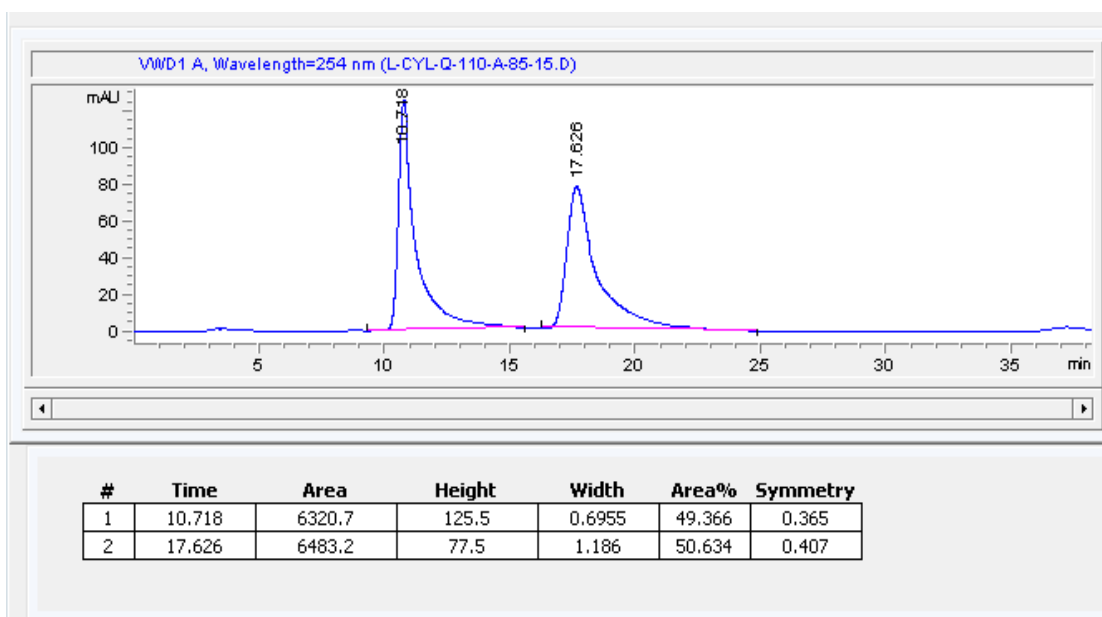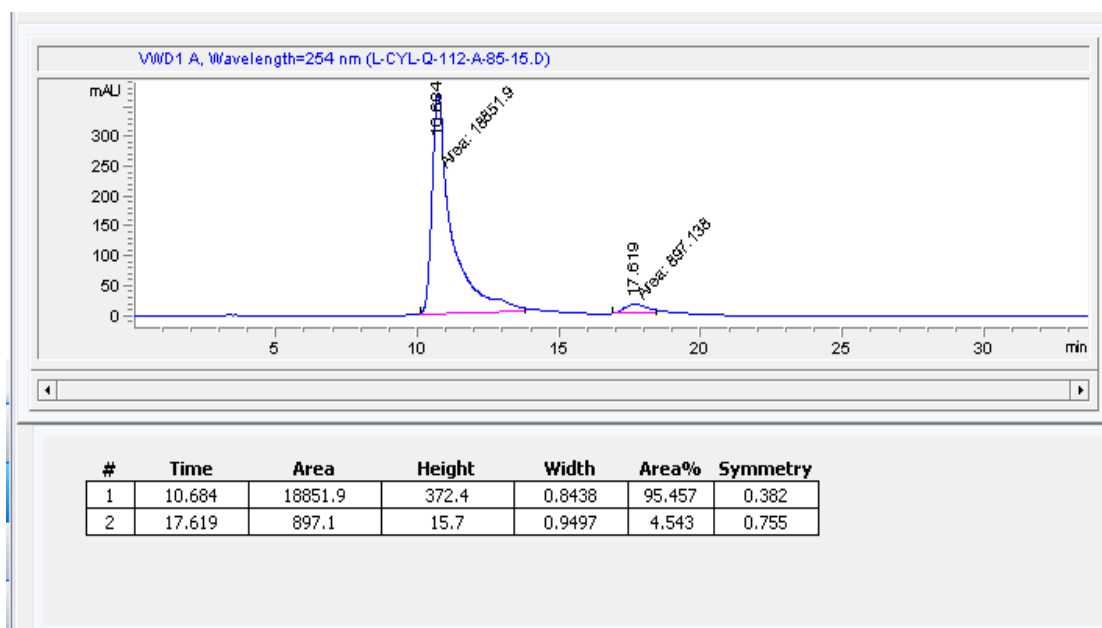

# $^1\text{H}$ and $^{13}\text{C}$ NMR of 8q

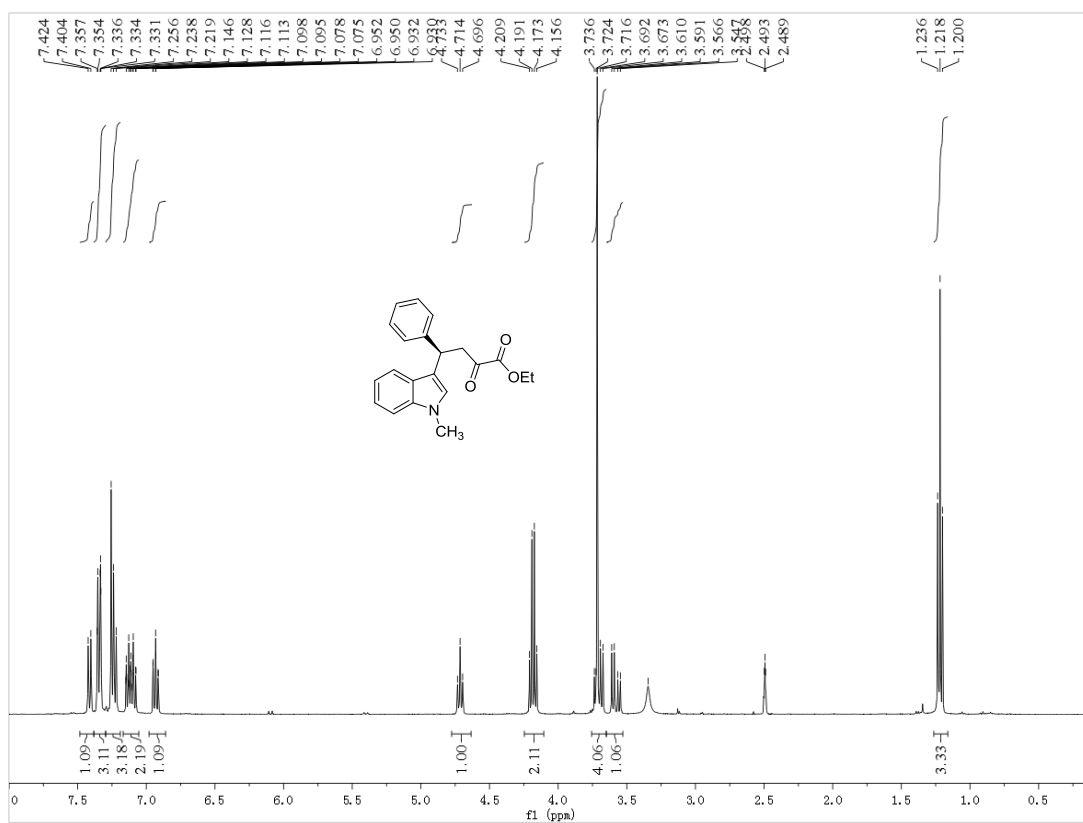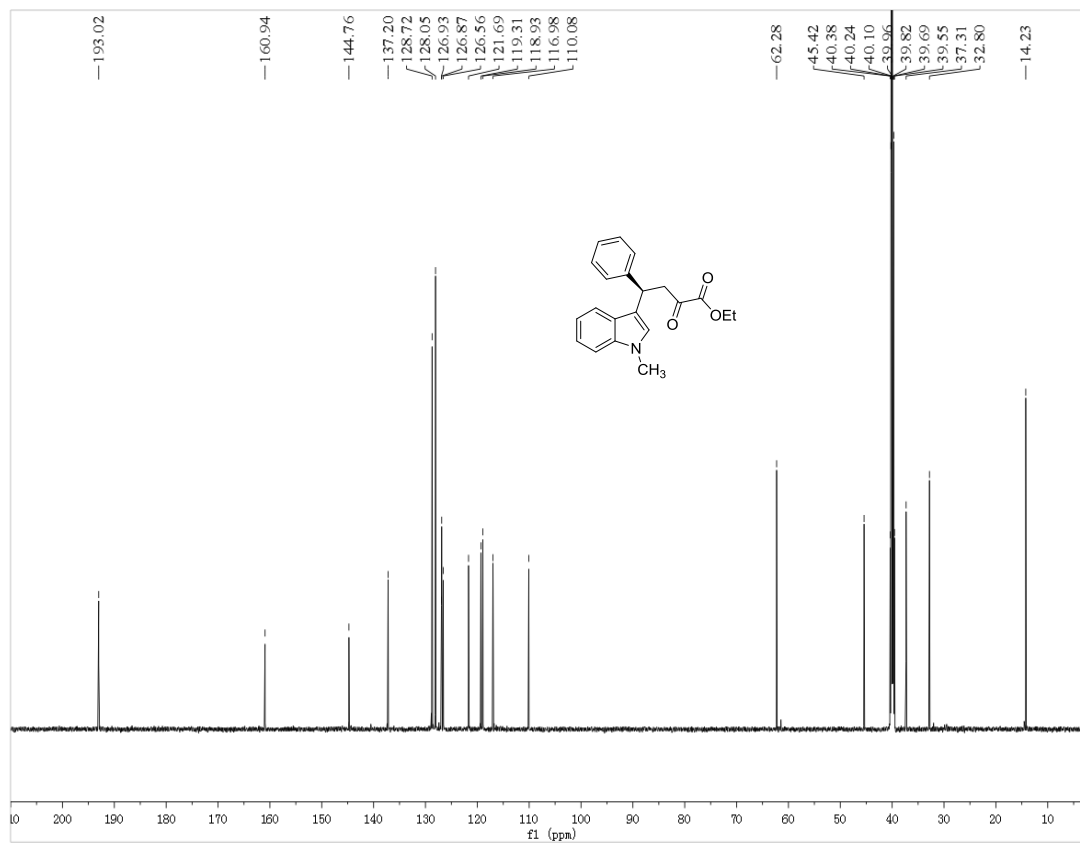

## HPLC of 8q

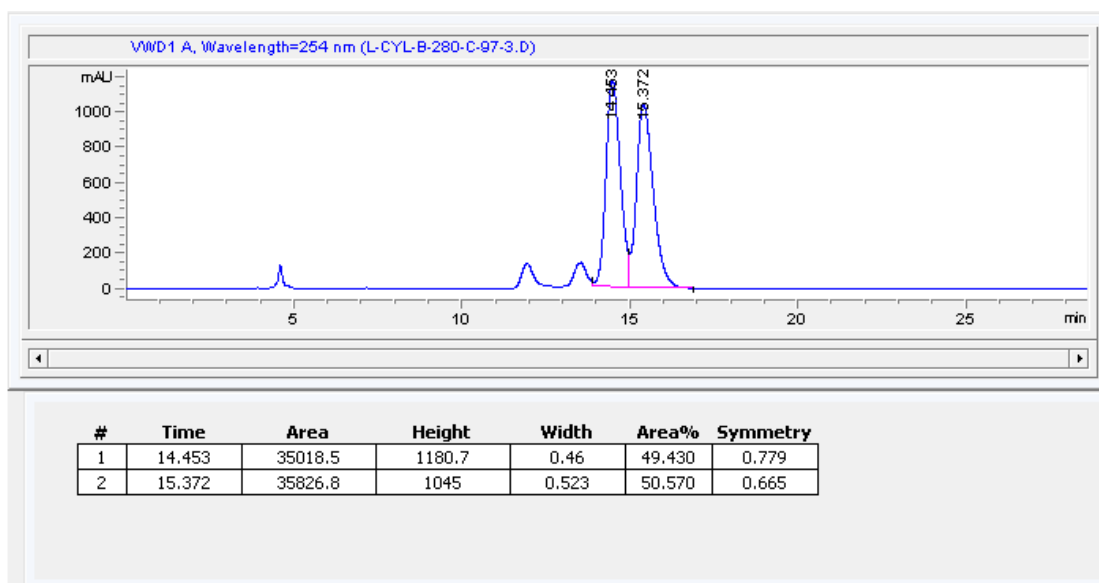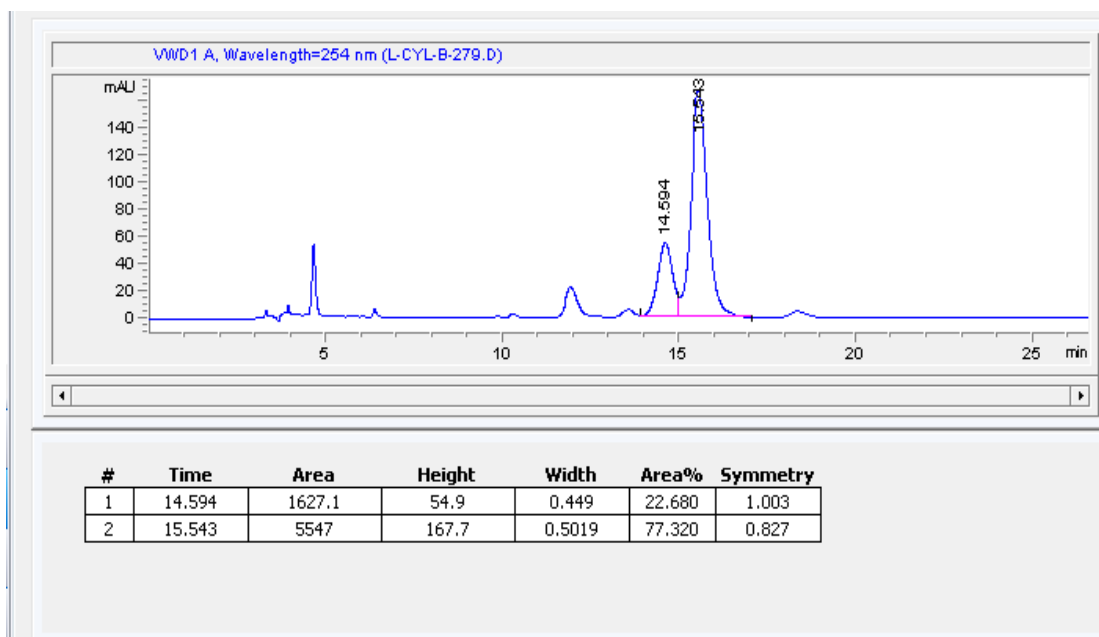

Supplement: d3nj05076a1.pdf [file d3nj05076a1.pdf]
